# Supplementary material for: Wild-Type TP53 Predicts Poor Prognosis in Patients with Gastric Cancer
Source: PubMed Central journal article supplement (PMC8694034; doi:10.26502/jcsct.50790107), 2021-03-18
Supplement: NIHMS1750514-supplement-2.pdf [file NIHMS1750514-supplement-2.pdf]

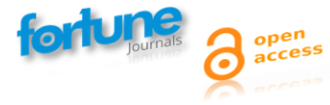

## Research Article

# Wild-Type TP53 Predicts Poor Prognosis in Patients with Gastric Cancer

Wenhong Deng<sup>1, 2</sup>, Qiongyu Hao<sup>2</sup>, Jaydutt Vadgama<sup>2\*</sup>, Yong Wu<sup>2\*</sup>

<sup>1</sup>Department of General Surgery, Renmin Hospital of Wuhan University, Wuhan, China

<sup>2</sup>Division of Cancer Research and Training, Department of Internal Medicine, Charles Drew University of Medicine and Science, CA, USA

**\*Corresponding Authors:** Jaydutt V Vadgama, Department of Internal Medicine, Charles R. Drew University of Medicine and Science, 1748 E. 118th Street, Los Angeles, CA 90059, USA, Tel: 323-563-9397; Fax: 323-563-4889; E-mail: [jayvadgama@cdrewu.edu](mailto:jayvadgama@cdrewu.edu)

Yong Wu, Department of Internal Medicine, Charles Drew University of Medicine and Science, David Geffen UCLA School of Medicine and UCLA Jonsson Comprehensive Cancer Center, Los Angeles, CA, USA, E-mail: [yongwu@cdrewu.edu](mailto:yongwu@cdrewu.edu)

**Received:** 17 December 2020; **Accepted:** 11 January 2021; **Published:** 18 March 2021

**Citation:** Wenhong Deng, Qiongyu Hao, Jaydutt Vadgama, Yong Wu. Wild-Type TP53 Predicts Poor Prognosis in Patients with Gastric Cancer. *Journal of Cancer Science and Clinical Therapeutics* 5 (2021): 134-153.

**Supplemental data**

| ene     | Cytoband   | (A)<br>TP53<br>m | (B)<br>TP53<br>wi | (A)<br>TP53<br>m | (B)<br>TP53<br>wi | Log<br>Ratio | p-<br>Value | q-<br>Value | Higher<br>exp-ression<br>in |
|---------|------------|------------------|-------------------|------------------|-------------------|--------------|-------------|-------------|-----------------------------|
| MDM2    | 12q15      | 10.46            | 11.28             | 0.58             | 0.94              | -0.82        | 1.25E-24    | 1.65E-20    | (B) TP53 wild in GC         |
| DDB2    | 11p11.2    | 8.3              | 8.92              | 0.6              | 0.72              | -0.62        | 1.35E-19    | 8.92E-16    | (B) TP53 wild in GC         |
| TENT2   | 5q14.1     | 9.6              | 9.92              | 0.42             | 0.41              | -0.32        | 1.87E-13    | 4.94E-10    | (B) TP53 wild in GC         |
| FAS     | 10q23.31   | 8.08             | 8.9               | 1.08             | 1.1               | -0.81        | 2.96E-13    | 5.57E-10    | (B) TP53 wild in GC         |
| RPS27L  | 15q22.2    | 9.95             | 10.48             | 0.68             | 0.75              | -0.52        | 5.64E-13    | 8.26E-10    | (B) TP53 wild in GC         |
| ZMAT3   | 3q26.32    | 7.93             | 8.47              | 0.69             | 0.83              | -0.54        | 1.64E-12    | 1.95E-09    | (B) TP53 wild in GC         |
| PDE4D   | 5q11.2-q12 | 8.65             | 9.38              | 1.01             | 1.04              | -0.74        | 1.98E-12    | 2.01E-09    | (B) TP53 wild in GC         |
| CCNG1   | 5q34       | 10.61            | 11.09             | 0.7              | 0.65              | -0.48        | 4.64E-12    | 3.65E-09    | (B) TP53 wild in GC         |
| SPATA18 | 4q12       | 6.39             | 7.32              | 1.29             | 1.43              | -0.93        | 1.38E-11    | 9.08E-09    | (B) TP53 wild in GC         |
| AP3B1   | 5q14.1     | 10.22            | 10.49             | 0.44             | 0.4               | -0.28        | 2.23E-10    | 1.13E-07    | (B) TP53 wild in GC         |
| RPL22L1 | 3q26.2     | 9.12             | 9.93              | 1.33             | 1.26              | -0.81        | 8.24E-10    | 3.10E-07    | (B) TP53 wild in GC         |
| JAK2    | 9p24.1     | 8.95             | 9.58              | 0.98             | 1.06              | -0.63        | 9.10E-10    | 3.21E-07    | (B) TP53 wild in GC         |
| TIGAR   | 12p13.32   | 8.75             | 9.13              | 0.61             | 0.61              | -0.38        | 9.21E-10    | 3.21E-07    | (B) TP53 wild in GC         |
| WDR41   | 5q13.3-q14 | 8.61             | 8.9               | 0.53             | 0.41              | -0.3         | 1.91E-09    | 5.75E-07    | (B) TP53 wild in GC         |

|         |          |       |       |      |      |       |          |          |                     |
|---------|----------|-------|-------|------|------|-------|----------|----------|---------------------|
| RASA1   | 5q14.3   | 9.32  | 9.63  | 0.52 | 0.49 | -0.31 | 2.21E-09 | 6.21E-07 | (B) TP53 wild in GC |
| FDXR    | 17q25.1  | 7.86  | 8.41  | 0.85 | 0.99 | -0.55 | 3.13E-09 | 8.10E-07 | (B) TP53 wild in GC |
| CLEC2D  | 12p13.31 | 8.23  | 8.66  | 0.74 | 0.7  | -0.43 | 4.26E-09 | 9.52E-07 | (B) TP53 wild in GC |
| XPC     | 3p25.1   | 9.41  | 9.67  | 0.44 | 0.41 | -0.25 | 4.49E-09 | 9.87E-07 | (B) TP53 wild in GC |
| TNFAIP8 | 5q23.1   | 8.32  | 8.82  | 0.82 | 0.89 | -0.5  | 6.47E-09 | 1.30E-06 | (B) TP53 wild in GC |
| PARP8   | 5q11.1   | 8.54  | 8.98  | 0.84 | 0.63 | -0.44 | 1.44E-08 | 2.43E-06 | (B) TP53 wild in GC |
| RRM2B   | 8q22.3   | 9.5   | 9.84  | 0.54 | 0.67 | -0.34 | 1.62E-08 | 2.67E-06 | (B) TP53 wild in GC |
| TRIM22  | 11p15.4  | 9.51  | 10.19 | 1.14 | 1.26 | -0.68 | 1.90E-08 | 2.94E-06 | (B) TP53 wild in GC |
| AHCYL2  | 7q32.1   | 10.13 | 10.84 | 1.25 | 1.26 | -0.7  | 3.02E-08 | 4.07E-06 | (B) TP53 wild in GC |
| ZFP2    | 5q35.3   | 3.61  | 4.26  | 1.19 | 1.1  | -0.65 | 3.38E-08 | 4.48E-06 | (B) TP53 wild in GC |
| FBXL5   | 4p15.32  | 10.45 | 10.72 | 0.43 | 0.53 | -0.27 | 3.50E-08 | 4.48E-06 | (B) TP53 wild in GC |
| YTHDC2  | 5q22.2   | 9.2   | 9.54  | 0.63 | 0.58 | -0.34 | 4.37E-08 | 5.39E-06 | (B) TP53 wild in GC |
| CIRBP   | 19p13.3  | 10.52 | 10.82 | 0.54 | 0.58 | -0.3  | 7.28E-08 | 7.86E-06 | (B) TP53 wild in GC |
| AEN     | 15q26.1  | 9.19  | 9.54  | 0.62 | 0.71 | -0.35 | 1.19E-07 | 1.17E-05 | (B) TP53 wild in GC |
| ZFYVE16 | 5q14.1   | 9.64  | 9.9   | 0.48 | 0.52 | -0.26 | 1.35E-07 | 1.28E-05 | (B) TP53 wild in GC |
| MRPS27  | 5q13.2   | 9.95  | 10.21 | 0.49 | 0.48 | -0.26 | 1.45E-07 | 1.33E-05 | (B) TP53 wild in GC |

|          |          |       |       |      |      |       |          |          |                     |
|----------|----------|-------|-------|------|------|-------|----------|----------|---------------------|
| AGGF1    | 5q13.3   | 9.56  | 9.79  | 0.45 | 0.4  | -0.23 | 1.81E-07 | 1.58E-05 | (B) TP53 wild in GC |
| CNOT8    | 5q33.2   | 9.78  | 9.96  | 0.34 | 0.34 | -0.18 | 1.86E-07 | 1.62E-05 | (B) TP53 wild in GC |
| TTC3     | 21q22.13 | 11.54 | 11.81 | 0.47 | 0.57 | -0.27 | 1.96E-07 | 1.68E-05 | (B) TP53 wild in GC |
| UBLCP1   | 5q33.3   | 8.91  | 9.16  | 0.5  | 0.44 | -0.25 | 2.08E-07 | 1.75E-05 | (B) TP53 wild in GC |
| RNF145   | 5q33.3   | 10.42 | 10.74 | 0.61 | 0.64 | -0.33 | 2.20E-07 | 1.81E-05 | (B) TP53 wild in GC |
| HSPA4L   | 4q28.1   | 6.68  | 7.61  | 1.88 | 1.62 | -0.93 | 2.25E-07 | 1.84E-05 | (B) TP53 wild in GC |
| EEF1A1   | 6q13     | 15.69 | 15.96 | 0.5  | 0.51 | -0.26 | 2.59E-07 | 2.05E-05 | (B) TP53 wild in GC |
| CNOT6L   | 4q21.1   | 9.95  | 10.22 | 0.53 | 0.52 | -0.27 | 2.91E-07 | 2.24E-05 | (B) TP53 wild in GC |
| RPS23    | 5q14.2   | 12.73 | 13.06 | 0.64 | 0.59 | -0.32 | 3.00E-07 | 2.28E-05 | (B) TP53 wild in GC |
| RABEP1   | 17p13.2  | 9.78  | 10.04 | 0.48 | 0.5  | -0.25 | 3.04E-07 | 2.29E-05 | (B) TP53 wild in GC |
| RPL3     | 22q13.1  | 14.06 | 14.35 | 0.57 | 0.55 | -0.29 | 3.52E-07 | 2.52E-05 | (B) TP53 wild in GC |
| ARL6IP5  | 3p14.1   | 11.2  | 11.5  | 0.6  | 0.56 | -0.3  | 3.91E-07 | 2.69E-05 | (B) TP53 wild in GC |
| FBXO38   | 5q32     | 9.3   | 9.52  | 0.45 | 0.42 | -0.22 | 4.35E-07 | 2.91E-05 | (B) TP53 wild in GC |
| NCOA4    | 10q11.22 | 12.22 | 12.45 | 0.47 | 0.42 | -0.23 | 5.09E-07 | 3.30E-05 | (B) TP53 wild in GC |
| C21ORF91 | 21q21.1  | 7.95  | 8.28  | 0.67 | 0.64 | -0.33 | 5.14E-07 | 3.32E-05 | (B) TP53 wild in GC |
| RIOK2    | 5q15     | 8.45  | 8.69  | 0.51 | 0.44 | -0.25 | 5.31E-07 | 3.38E-05 | (B) TP53 wild in GC |

|           |            |       |       |      |      |       |          |          |                     |
|-----------|------------|-------|-------|------|------|-------|----------|----------|---------------------|
| ITGB7     | 12q13.13   | 7.4   | 7.98  | 1.1  | 1.18 | -0.57 | 5.44E-07 | 3.40E-05 | (B) TP53 wild in GC |
| CYLD      | 16q12.1    | 9.44  | 9.77  | 0.65 | 0.67 | -0.33 | 5.94E-07 | 3.58E-05 | (B) TP53 wild in GC |
| TTC19     | 17p12      | 9.61  | 9.91  | 0.6  | 0.58 | -0.3  | 6.35E-07 | 3.77E-05 | (B) TP53 wild in GC |
| RPL23AP53 | 8p23.3     | 6.97  | 7.34  | 0.73 | 0.74 | -0.37 | 6.95E-07 | 4.02E-05 | (B) TP53 wild in GC |
| ARHGEF3   | 3p14.3     | 9.19  | 9.49  | 0.53 | 0.65 | -0.29 | 7.05E-07 | 4.04E-05 | (B) TP53 wild in GC |
| ADPRM     | 17p13.1    | 6.73  | 7.02  | 0.58 | 0.55 | -0.28 | 7.08E-07 | 4.04E-05 | (B) TP53 wild in GC |
| USP22     | 17p11.2    | 11.71 | 11.96 | 0.53 | 0.46 | -0.25 | 7.36E-07 | 4.14E-05 | (B) TP53 wild in GC |
| TMED7     | 5q22.3     | 11.21 | 11.46 | 0.49 | 0.5  | -0.25 | 7.43E-07 | 4.14E-05 | (B) TP53 wild in GC |
| PAFAH1B1  | 17p13.3    | 11.05 | 11.26 | 0.4  | 0.43 | -0.21 | 7.85E-07 | 4.27E-05 | (B) TP53 wild in GC |
| FCHO2     | 5q13.2     | 9.62  | 9.94  | 0.66 | 0.64 | -0.33 | 8.05E-07 | 4.35E-05 | (B) TP53 wild in GC |
| MBNL1     | 3q25.1-q25 | 11.75 | 12.03 | 0.54 | 0.59 | -0.28 | 8.59E-07 | 4.62E-05 | (B) TP53 wild in GC |
| FUT10     | 8p12       | 7.31  | 7.65  | 0.71 | 0.7  | -0.35 | 1.01E-06 | 5.21E-05 | (B) TP53 wild in GC |
| TMTC2     | 12q21.31   | 8.47  | 8.89  | 0.86 | 0.87 | -0.43 | 1.02E-06 | 5.22E-05 | (B) TP53 wild in GC |
| PIK3R1    | 5q13.1     | 10.22 | 10.6  | 0.75 | 0.81 | -0.38 | 1.03E-06 | 5.26E-05 | (B) TP53 wild in GC |
| FAM13B    | 5q31.2     | 8.99  | 9.34  | 0.66 | 0.77 | -0.35 | 1.04E-06 | 5.28E-05 | (B) TP53 wild in GC |
| PGGT1B    | 5q22.3     | 8.09  | 8.34  | 0.52 | 0.49 | -0.25 | 1.06E-06 | 5.32E-05 | (B) TP53 wild in GC |

|           |          |       |       |      |      |       |          |          |                     |
|-----------|----------|-------|-------|------|------|-------|----------|----------|---------------------|
| RIC1      | 9p24.1   | 9.01  | 9.34  | 0.7  | 0.63 | -0.33 | 1.12E-06 | 5.44E-05 | (B) TP53 wild in GC |
| GPBP1     | 5q11.2   | 10.31 | 10.51 | 0.41 | 0.41 | -0.2  | 1.18E-06 | 5.71E-05 | (B) TP53 wild in GC |
| DYRK4     | 12p13.32 | 7.96  | 8.32  | 0.82 | 0.62 | -0.36 | 1.33E-06 | 6.18E-05 | (B) TP53 wild in GC |
| SLC25A46  | 5q22.1   | 8.92  | 9.26  | 0.77 | 0.59 | -0.34 | 1.52E-06 | 6.92E-05 | (B) TP53 wild in GC |
| RFX7      | 15q21.3  | 9.34  | 9.63  | 0.59 | 0.62 | -0.29 | 1.61E-06 | 7.22E-05 | (B) TP53 wild in GC |
| ZNF561    | 19p13.2  | 8.75  | 9.02  | 0.58 | 0.54 | -0.27 | 1.63E-06 | 7.30E-05 | (B) TP53 wild in GC |
| EIF4B     | 12q13.13 | 12.29 | 12.51 | 0.47 | 0.47 | -0.23 | 1.71E-06 | 7.54E-05 | (B) TP53 wild in GC |
| METTL25   | 12q21.31 | 5.87  | 6.15  | 0.61 | 0.51 | -0.28 | 1.72E-06 | 7.54E-05 | (B) TP53 wild in GC |
| TNFRSF10C | 8p21.3   | 5.41  | 6.07  | 1.22 | 1.57 | -0.66 | 1.72E-06 | 7.54E-05 | (B) TP53 wild in GC |
| CRTAP     | 3p22.3   | 11.58 | 11.88 | 0.62 | 0.64 | -0.3  | 1.73E-06 | 7.54E-05 | (B) TP53 wild in GC |
| TMEM30A   | 6q14.1   | 11.51 | 11.74 | 0.46 | 0.49 | -0.23 | 1.87E-06 | 7.95E-05 | (B) TP53 wild in GC |
| EEF2      | 19p13.3  | 15.44 | 15.73 | 0.62 | 0.58 | -0.29 | 2.00E-06 | 8.33E-05 | (B) TP53 wild in GC |
| RBFOX2    | 22q12.3  | 10.59 | 10.85 | 0.49 | 0.62 | -0.26 | 2.11E-06 | 8.55E-05 | (B) TP53 wild in GC |
| DGLUCY    | 14q32.11 | 9.03  | 9.35  | 0.66 | 0.71 | -0.32 | 2.22E-06 | 8.91E-05 | (B) TP53 wild in GC |
| MAP2K4    | 17p12    | 9.24  | 9.5   | 0.61 | 0.49 | -0.27 | 2.31E-06 | 9.17E-05 | (B) TP53 wild in GC |
| SMG6      | 17p13.3  | 9.74  | 9.97  | 0.46 | 0.49 | -0.22 | 2.46E-06 | 9.52E-05 | (B) TP53 wild in GC |

|        |         |       |       |      |      |       |          |          |                     |
|--------|---------|-------|-------|------|------|-------|----------|----------|---------------------|
| CEP120 | 5q23.2  | 8.77  | 9.03  | 0.57 | 0.52 | -0.26 | 2.63E-06 | 1.00E-04 | (B) TP53 wild in GC |
| CYB5D2 | 17p13.2 | 7.7   | 7.97  | 0.59 | 0.55 | -0.27 | 2.84E-06 | 1.08E-04 | (B) TP53 wild in GC |
| WDR82  | 3p21.2  | 10.96 | 11.13 | 0.39 | 0.34 | -0.17 | 2.86E-06 | 1.08E-04 | (B) TP53 wild in GC |
| KLRK1  | 12p13.2 | 4.96  | 5.77  | 1.7  | 1.78 | -0.82 | 2.94E-06 | 1.10E-04 | (B) TP53 wild in GC |
| ANKFY1 | 17p13.2 | 10.7  | 10.93 | 0.5  | 0.5  | -0.23 | 3.43E-06 | 1.26E-04 | (B) TP53 wild in GC |
| CELF2  | 10p14   | 8.71  | 9.34  | 1.27 | 1.48 | -0.64 | 3.43E-06 | 1.26E-04 | (B) TP53 wild in GC |
| SNRK   | 3p22.1  | 9.85  | 10.12 | 0.54 | 0.59 | -0.26 | 3.48E-06 | 1.27E-04 | (B) TP53 wild in GC |
| DIP2A  | 21q22.3 | 9.49  | 9.71  | 0.47 | 0.49 | -0.22 | 3.75E-06 | 1.34E-04 | (B) TP53 wild in GC |
| BTF3   | 5q13.2  | 12.26 | 12.52 | 0.56 | 0.56 | -0.26 | 3.75E-06 | 1.34E-04 | (B) TP53 wild in GC |
| SNX18  | 5q11.2  | 9.32  | 9.63  | 0.67 | 0.66 | -0.31 | 4.03E-06 | 1.41E-04 | (B) TP53 wild in GC |
| REEP5  | 5q22.2  | 11.27 | 11.5  | 0.49 | 0.47 | -0.22 | 4.09E-06 | 1.42E-04 | (B) TP53 wild in GC |
| MBLAC2 | 5q14.3  | 7.31  | 7.63  | 0.71 | 0.62 | -0.31 | 4.28E-06 | 1.47E-04 | (B) TP53 wild in GC |
| TMEM71 | 8q24.22 | 4.54  | 5.16  | 1.3  | 1.43 | -0.62 | 4.57E-06 | 1.53E-04 | (B) TP53 wild in GC |
| IPCEF1 | 6q25.2  | 5.56  | 6.16  | 1.28 | 1.31 | -0.6  | 4.57E-06 | 1.53E-04 | (B) TP53 wild in GC |
| ARPP19 | 15q21.2 | 11.83 | 12.04 | 0.47 | 0.44 | -0.21 | 5.00E-06 | 1.65E-04 | (B) TP53 wild in GC |
| NLRC3  | 16p13.3 | 6.94  | 7.48  | 1.13 | 1.23 | -0.54 | 5.00E-06 | 1.65E-04 | (B) TP53 wild in GC |

|         |            |       |       |      |      |       |          |          |                     |
|---------|------------|-------|-------|------|------|-------|----------|----------|---------------------|
| UBASH3A | 21q22.3    | 4.53  | 5.26  | 1.59 | 1.58 | -0.73 | 5.26E-06 | 1.71E-04 | (B) TP53 wild in GC |
| TXNDC15 | 5q31.1     | 9.42  | 9.66  | 0.53 | 0.52 | -0.24 | 5.52E-06 | 1.78E-04 | (B) TP53 wild in GC |
| IPO11   | 5q12.1     | 8.87  | 9.09  | 0.48 | 0.47 | -0.22 | 5.55E-06 | 1.78E-04 | (B) TP53 wild in GC |
| CSNK1A1 | 5q32       | 11.82 | 12    | 0.43 | 0.33 | -0.18 | 6.13E-06 | 1.92E-04 | (B) TP53 wild in GC |
| PJA2    | 5q21.3     | 10.92 | 11.22 | 0.62 | 0.72 | -0.3  | 6.49E-06 | 2.00E-04 | (B) TP53 wild in GC |
| MSH3    | 5q14.1     | 8.48  | 8.72  | 0.53 | 0.53 | -0.24 | 6.64E-06 | 2.04E-04 | (B) TP53 wild in GC |
| RBMS2   | 12q13.3    | 10.07 | 10.39 | 0.72 | 0.69 | -0.32 | 6.86E-06 | 2.08E-04 | (B) TP53 wild in GC |
| AKAP10  | 17p11.2    | 8.42  | 8.65  | 0.54 | 0.49 | -0.24 | 7.10E-06 | 2.15E-04 | (B) TP53 wild in GC |
| TET2    | 4q24       | 9.32  | 9.6   | 0.62 | 0.62 | -0.28 | 7.32E-06 | 2.20E-04 | (B) TP53 wild in GC |
| ANKRA2  | 5q13.2     | 7.83  | 8.04  | 0.48 | 0.44 | -0.21 | 7.33E-06 | 2.20E-04 | (B) TP53 wild in GC |
| CD96    | 3q13.13-q1 | 7.07  | 7.71  | 1.43 | 1.42 | -0.64 | 7.57E-06 | 2.25E-04 | (B) TP53 wild in GC |
| ARHGEF6 | Xq26.3     | 8.17  | 8.67  | 1.08 | 1.15 | -0.5  | 7.63E-06 | 2.26E-04 | (B) TP53 wild in GC |
| CHD1    | 5q15-q21.1 | 9.76  | 10.01 | 0.6  | 0.5  | -0.25 | 8.16E-06 | 2.38E-04 | (B) TP53 wild in GC |
| CCDC50  | 3q28       | 10.44 | 10.72 | 0.6  | 0.66 | -0.28 | 8.29E-06 | 2.42E-04 | (B) TP53 wild in GC |
| FAM151B | 5q14.1     | 3.77  | 4.14  | 0.81 | 0.82 | -0.37 | 8.57E-06 | 2.48E-04 | (B) TP53 wild in GC |
| REV3L   | 6q21       | 9.48  | 9.79  | 0.65 | 0.72 | -0.31 | 8.81E-06 | 2.54E-04 | (B) TP53 wild in GC |



|         |          |       |       |      |      |       |          |          |                     |
|---------|----------|-------|-------|------|------|-------|----------|----------|---------------------|
| PHAX    | 5q23.2   | 8.37  | 8.54  | 0.39 | 0.39 | -0.17 | 9.24E-06 | 2.64E-04 | (B) TP53 wild in GC |
| GALNT10 | 5q33.2   | 10.24 | 10.58 | 0.75 | 0.78 | -0.34 | 9.33E-06 | 2.66E-04 | (B) TP53 wild in GC |
| FEM1C   | 5q22.3   | 9.68  | 9.92  | 0.57 | 0.53 | -0.25 | 9.64E-06 | 2.73E-04 | (B) TP53 wild in GC |
| PRKX    | Xp22.33  | 9.12  | 9.5   | 0.91 | 0.76 | -0.38 | 9.81E-06 | 2.77E-04 | (B) TP53 wild in GC |
| TRIM5   | 11p15.4  | 8.61  | 8.9   | 0.7  | 0.56 | -0.29 | 9.82E-06 | 2.77E-04 | (B) TP53 wild in GC |
| ABHD5   | 3p21.33  | 8.85  | 9.08  | 0.49 | 0.53 | -0.23 | 9.87E-06 | 2.77E-04 | (B) TP53 wild in GC |
| THEMIS  | 6q22.33  | 5.1   | 5.84  | 1.64 | 1.69 | -0.74 | 1.02E-05 | 2.85E-04 | (B) TP53 wild in GC |
| ITK     | 5q33.3   | 6.3   | 6.99  | 1.56 | 1.56 | -0.69 | 1.05E-05 | 2.87E-04 | (B) TP53 wild in GC |
| TK2     | 16q21    | 8.68  | 8.94  | 0.6  | 0.6  | -0.27 | 1.05E-05 | 2.87E-04 | (B) TP53 wild in GC |
| THG1L   | 5q33.3   | 7.38  | 7.63  | 0.59 | 0.53 | -0.25 | 1.08E-05 | 2.92E-04 | (B) TP53 wild in GC |
| RANBP6  | 9p24.1   | 8.44  | 8.74  | 0.71 | 0.64 | -0.3  | 1.18E-05 | 3.14E-04 | (B) TP53 wild in GC |
| GVINP1  | 11p15.4  | 6.67  | 7.31  | 1.45 | 1.47 | -0.64 | 1.21E-05 | 3.20E-04 | (B) TP53 wild in GC |
| GIT2    | 12q24.11 | 10    | 10.23 | 0.51 | 0.55 | -0.23 | 1.27E-05 | 3.32E-04 | (B) TP53 wild in GC |
| NSA2    | 5q13.3   | 10.23 | 10.5  | 0.64 | 0.61 | -0.28 | 1.29E-05 | 3.35E-04 | (B) TP53 wild in GC |
| PRKCQ   | 10p15.1  | 5.23  | 5.97  | 1.76 | 1.59 | -0.74 | 1.31E-05 | 3.38E-04 | (B) TP53 wild in GC |
| CHD3    | 17p13.1  | 11.18 | 11.51 | 0.76 | 0.74 | -0.33 | 1.37E-05 | 3.49E-04 | (B) TP53 wild in GC |

|           |          |       |       |      |      |       |          |          |                     |
|-----------|----------|-------|-------|------|------|-------|----------|----------|---------------------|
| TMEM167   | 5q14.2   | 10.57 | 10.78 | 0.47 | 0.48 | -0.21 | 1.40E-05 | 3.56E-04 | (B) TP53 wild in GC |
| TBC1D12   | 10q23.33 | 8.44  | 8.67  | 0.53 | 0.52 | -0.23 | 1.40E-05 | 3.56E-04 | (B) TP53 wild in GC |
| AGAP2     | 12q14.1  | 6.92  | 7.46  | 1.19 | 1.3  | -0.54 | 1.42E-05 | 3.59E-04 | (B) TP53 wild in GC |
| SECISBP2L | 15q21.1  | 9.82  | 10.08 | 0.55 | 0.62 | -0.25 | 1.43E-05 | 3.62E-04 | (B) TP53 wild in GC |
| UBE2G1    | 17p13.2  | 10.46 | 10.63 | 0.39 | 0.38 | -0.17 | 1.46E-05 | 3.65E-04 | (B) TP53 wild in GC |
| PHLDA3    | 1q32.1   | 8.85  | 9.41  | 1.29 | 1.28 | -0.56 | 1.47E-05 | 3.68E-04 | (B) TP53 wild in GC |
| TTC23     | 15q26.3  | 7.77  | 8.1   | 0.75 | 0.77 | -0.33 | 1.50E-05 | 3.74E-04 | (B) TP53 wild in GC |
| KIAA1143  | 3p21.31  | 9.48  | 9.68  | 0.47 | 0.45 | -0.2  | 1.54E-05 | 3.81E-04 | (B) TP53 wild in GC |
| SCAMP1    | 5q14.1   | 10.06 | 10.27 | 0.47 | 0.54 | -0.22 | 1.58E-05 | 3.87E-04 | (B) TP53 wild in GC |
| PDE5A     | 4q26     | 9.11  | 9.6   | 1.07 | 1.22 | -0.49 | 1.62E-05 | 3.96E-04 | (B) TP53 wild in GC |
| COL4A3BP  | 5q13.3   | 9.54  | 9.74  | 0.46 | 0.47 | -0.2  | 1.63E-05 | 3.97E-04 | (B) TP53 wild in GC |
| MAP4      | 3p21.31  | 12.28 | 12.5  | 0.49 | 0.54 | -0.22 | 1.63E-05 | 3.97E-04 | (B) TP53 wild in GC |
| FUT8      | 14q23.3  | 10    | 10.3  | 0.67 | 0.68 | -0.29 | 1.68E-05 | 4.06E-04 | (B) TP53 wild in GC |
| RBSN      | 3p25.1   | 9.22  | 9.45  | 0.48 | 0.55 | -0.22 | 1.70E-05 | 4.07E-04 | (B) TP53 wild in GC |
| NUDT6     | 4q28.1   | 5.25  | 5.68  | 1.04 | 0.93 | -0.43 | 1.70E-05 | 4.07E-04 | (B) TP53 wild in GC |
| CDC42SE2  | 5q31.1   | 10.41 | 10.68 | 0.62 | 0.61 | -0.26 | 1.73E-05 | 4.13E-04 | (B) TP53 wild in GC |

|         |          |       |       |      |      |       |          |          |                     |
|---------|----------|-------|-------|------|------|-------|----------|----------|---------------------|
| ZNF132  | 19q13.43 | 5.17  | 5.58  | 0.92 | 0.96 | -0.4  | 1.74E-05 | 4.13E-04 | (B) TP53 wild in GC |
| CCNH    | 5q14.3   | 8.9   | 9.1   | 0.5  | 0.43 | -0.2  | 1.80E-05 | 4.26E-04 | (B) TP53 wild in GC |
| DMXL1   | 5q23.1   | 9.55  | 9.83  | 0.64 | 0.68 | -0.28 | 1.81E-05 | 4.28E-04 | (B) TP53 wild in GC |
| ZNF557  | 19p13.2  | 7.39  | 7.66  | 0.67 | 0.56 | -0.27 | 1.82E-05 | 4.28E-04 | (B) TP53 wild in GC |
| APC     | 5q22.2   | 9.63  | 9.93  | 0.73 | 0.66 | -0.3  | 1.87E-05 | 4.37E-04 | (B) TP53 wild in GC |
| PRMT2   | 21q22.3  | 9.82  | 10.04 | 0.52 | 0.48 | -0.22 | 1.93E-05 | 4.50E-04 | (B) TP53 wild in GC |
| SEC31B  | 10q24.31 | 5.62  | 6.17  | 1.26 | 1.3  | -0.55 | 1.94E-05 | 4.51E-04 | (B) TP53 wild in GC |
| GAB3    | Xq28     | 6.19  | 6.64  | 1.01 | 1.14 | -0.46 | 2.00E-05 | 4.60E-04 | (B) TP53 wild in GC |
| TIFA    | 4q25     | 7.5   | 7.76  | 0.6  | 0.62 | -0.26 | 2.11E-05 | 4.80E-04 | (B) TP53 wild in GC |
| CAST    | 5q15     | 11.92 | 12.18 | 0.65 | 0.6  | -0.27 | 2.13E-05 | 4.81E-04 | (B) TP53 wild in GC |
| PTPN22  | 1p13.2   | 6.87  | 7.38  | 1.17 | 1.24 | -0.51 | 2.21E-05 | 4.95E-04 | (B) TP53 wild in GC |
| SP1     | 12q13.13 | 11.87 | 12.03 | 0.36 | 0.4  | -0.16 | 2.24E-05 | 5.01E-04 | (B) TP53 wild in GC |
| MITF    | 3p13     | 7.79  | 8.28  | 1.12 | 1.2  | -0.49 | 2.27E-05 | 5.05E-04 | (B) TP53 wild in GC |
| METTL14 | 4q26     | 7.73  | 7.92  | 0.44 | 0.43 | -0.18 | 2.29E-05 | 5.06E-04 | (B) TP53 wild in GC |
| LINS1   | 15q26.3  | 8.01  | 8.23  | 0.53 | 0.53 | -0.23 | 2.31E-05 | 5.08E-04 | (B) TP53 wild in GC |
| PCGF5   | 10q23.32 | 10.8  | 11.02 | 0.51 | 0.5  | -0.21 | 2.34E-05 | 5.13E-04 | (B) TP53 wild in GC |

|         |            |       |       |      |      |       |          |          |                     |
|---------|------------|-------|-------|------|------|-------|----------|----------|---------------------|
| TLR3    | 4q35.1     | 7.3   | 7.86  | 1.37 | 1.25 | -0.56 | 2.43E-05 | 5.31E-04 | (B) TP53 wild in GC |
| DELE1   | 5q31.3     | 9.65  | 9.83  | 0.47 | 0.39 | -0.18 | 2.45E-05 | 5.33E-04 | (B) TP53 wild in GC |
| NDUFS4  | 5q11.2     | 8.85  | 9.1   | 0.61 | 0.56 | -0.25 | 2.51E-05 | 5.42E-04 | (B) TP53 wild in GC |
| WHAMM   | 15q25.2    | 8.3   | 8.49  | 0.45 | 0.47 | -0.19 | 2.62E-05 | 5.62E-04 | (B) TP53 wild in GC |
| HGSNAT  | 8p11.21-p1 | 10.87 | 11.12 | 0.6  | 0.58 | -0.25 | 2.62E-05 | 5.62E-04 | (B) TP53 wild in GC |
| ITGAE   | 17p13.2    | 7.95  | 8.26  | 0.72 | 0.74 | -0.31 | 2.66E-05 | 5.64E-04 | (B) TP53 wild in GC |
| SLC6A14 | Xq23       | 7.67  | 8.85  | 2.89 | 2.64 | -1.18 | 2.75E-05 | 5.77E-04 | (B) TP53 wild in GC |
| UTRN    | 6q24.2     | 10.47 | 10.86 | 0.9  | 0.94 | -0.39 | 2.75E-05 | 5.78E-04 | (B) TP53 wild in GC |
| OGA     | 10q24.32   | 10.96 | 11.18 | 0.5  | 0.56 | -0.22 | 2.81E-05 | 5.88E-04 | (B) TP53 wild in GC |
| KLRG1   | 12p13.31   | 4     | 4.53  | 1.24 | 1.24 | -0.52 | 2.86E-05 | 5.95E-04 | (B) TP53 wild in GC |
| ARRDC3  | 5q14.3     | 10.2  | 10.5  | 0.73 | 0.73 | -0.31 | 2.90E-05 | 6.04E-04 | (B) TP53 wild in GC |
| SLF2    | 10q24.31   | 9.19  | 9.42  | 0.52 | 0.55 | -0.22 | 3.00E-05 | 6.21E-04 | (B) TP53 wild in GC |
| MECOM   | 3q26.2     | 10.7  | 11.22 | 1.39 | 1.01 | -0.52 | 3.11E-05 | 6.40E-04 | (B) TP53 wild in GC |
| IL16    | 15q25.1    | 8     | 8.51  | 1.21 | 1.27 | -0.52 | 3.15E-05 | 6.46E-04 | (B) TP53 wild in GC |
| FCHSD2  | 11q13.4    | 9.24  | 9.51  | 0.65 | 0.65 | -0.27 | 3.19E-05 | 6.50E-04 | (B) TP53 wild in GC |
| ETV6    | 12p13.2    | 10.6  | 10.8  | 0.51 | 0.44 | -0.2  | 3.21E-05 | 6.52E-04 | (B) TP53 wild in GC |

|          |            |       |       |      |      |       |          |          |                     |
|----------|------------|-------|-------|------|------|-------|----------|----------|---------------------|
| CXCR6    | 3p21.31    | 6.59  | 7.16  | 1.34 | 1.38 | -0.57 | 3.25E-05 | 6.58E-04 | (B) TP53 wild in GC |
| FAM160B1 | 10q25.3    | 9.31  | 9.53  | 0.49 | 0.55 | -0.21 | 3.27E-05 | 6.62E-04 | (B) TP53 wild in GC |
| NOA1     | 4q12       | 9.69  | 9.87  | 0.43 | 0.44 | -0.18 | 3.33E-05 | 6.69E-04 | (B) TP53 wild in GC |
| GANC     | 15q15.1    | 8.32  | 8.56  | 0.55 | 0.58 | -0.24 | 3.34E-05 | 6.69E-04 | (B) TP53 wild in GC |
| BCL2     | 18q21.33   | 7.51  | 7.97  | 1.1  | 1.11 | -0.46 | 3.40E-05 | 6.78E-04 | (B) TP53 wild in GC |
| CCDC125  | 5q13.2     | 7.66  | 7.93  | 0.71 | 0.59 | -0.28 | 3.41E-05 | 6.79E-04 | (B) TP53 wild in GC |
| ACKR4    | 3q22.1     | 6.6   | 7.31  | 1.68 | 1.76 | -0.71 | 3.51E-05 | 6.91E-04 | (B) TP53 wild in GC |
| GPR34    | Xp11.4     | 6.69  | 7.21  | 1.16 | 1.37 | -0.52 | 3.51E-05 | 6.91E-04 | (B) TP53 wild in GC |
| CD8A     | 2p11.2     | 7.29  | 7.99  | 1.66 | 1.71 | -0.7  | 3.58E-05 | 7.03E-04 | (B) TP53 wild in GC |
| C4ORF3   | 4q26       | 10.47 | 10.71 | 0.56 | 0.6  | -0.24 | 3.61E-05 | 7.07E-04 | (B) TP53 wild in GC |
| PITPNM3  | 17p13.2-p1 | 7.51  | 8.2   | 1.63 | 1.67 | -0.68 | 3.65E-05 | 7.09E-04 | (B) TP53 wild in GC |
| CD2      | 1p13.1     | 7.78  | 8.35  | 1.39 | 1.39 | -0.58 | 3.68E-05 | 7.15E-04 | (B) TP53 wild in GC |
| ZNF33B   | 10q11.21   | 9.3   | 9.55  | 0.63 | 0.62 | -0.26 | 3.71E-05 | 7.18E-04 | (B) TP53 wild in GC |
| SMARCA2  | 9p24.3     | 10.24 | 10.6  | 0.87 | 0.83 | -0.35 | 3.80E-05 | 7.28E-04 | (B) TP53 wild in GC |
| CD3E     | 11q23.3    | 8.09  | 8.67  | 1.41 | 1.42 | -0.58 | 3.80E-05 | 7.28E-04 | (B) TP53 wild in GC |
| GABRP    | 5q35.1     | 7.5   | 8.91  | 3.41 | 3.39 | -1.41 | 3.84E-05 | 7.31E-04 | (B) TP53 wild in GC |

|          |            |       |       |      |      |       |          |          |                     |
|----------|------------|-------|-------|------|------|-------|----------|----------|---------------------|
| ARHGAP26 | 5q31.3     | 10.06 | 10.39 | 0.79 | 0.86 | -0.34 | 3.85E-05 | 7.32E-04 | (B) TP53 wild in GC |
| SRR      | 17p13.3    | 6.94  | 7.23  | 0.67 | 0.72 | -0.28 | 3.87E-05 | 7.35E-04 | (B) TP53 wild in GC |
| STX17    | 9q31.1     | 9.69  | 9.87  | 0.43 | 0.41 | -0.17 | 3.93E-05 | 7.43E-04 | (B) TP53 wild in GC |
| CYFIP2   | 5q33.3     | 8.91  | 9.41  | 1.25 | 1.15 | -0.5  | 3.96E-05 | 7.48E-04 | (B) TP53 wild in GC |
| SLMAP    | 3p14.3     | 10.56 | 10.89 | 0.72 | 0.89 | -0.33 | 3.99E-05 | 7.52E-04 | (B) TP53 wild in GC |
| METTL16  | 17p13.3    | 9.34  | 9.51  | 0.43 | 0.43 | -0.18 | 4.08E-05 | 7.62E-04 | (B) TP53 wild in GC |
| ITGA4    | 2q31.3     | 8.62  | 9.09  | 1.14 | 1.1  | -0.46 | 4.11E-05 | 7.67E-04 | (B) TP53 wild in GC |
| RPL26    | 17p13.1    | 12.42 | 12.75 | 0.85 | 0.74 | -0.33 | 4.16E-05 | 7.73E-04 | (B) TP53 wild in GC |
| GZMA     | 5q11.2     | 6.37  | 7.03  | 1.67 | 1.51 | -0.66 | 4.24E-05 | 7.81E-04 | (B) TP53 wild in GC |
| MTMR10   | 15q13.3    | 9.61  | 9.87  | 0.63 | 0.61 | -0.26 | 4.27E-05 | 7.86E-04 | (B) TP53 wild in GC |
| TMEM161  | 5q14.3     | 7.62  | 7.87  | 0.65 | 0.52 | -0.25 | 4.33E-05 | 7.96E-04 | (B) TP53 wild in GC |
| FBXL17   | 5q21.3     | 9.04  | 9.27  | 0.57 | 0.55 | -0.23 | 4.34E-05 | 7.96E-04 | (B) TP53 wild in GC |
| BBS12    | 4q27       | 6.25  | 6.52  | 0.64 | 0.66 | -0.27 | 4.36E-05 | 7.96E-04 | (B) TP53 wild in GC |
| THUMPD1  | 16p12.3    | 9.95  | 10.12 | 0.41 | 0.42 | -0.17 | 4.43E-05 | 8.07E-04 | (B) TP53 wild in GC |
| SLK      | 10q24.33-q | 10.95 | 11.22 | 0.66 | 0.68 | -0.27 | 4.45E-05 | 8.10E-04 | (B) TP53 wild in GC |
| CD101    | 1p13.1     | 5.42  | 5.83  | 0.98 | 1.02 | -0.41 | 4.46E-05 | 8.11E-04 | (B) TP53 wild in GC |

|           |            |       |       |      |      |       |          |          |                     |
|-----------|------------|-------|-------|------|------|-------|----------|----------|---------------------|
| ZNF197    | 3p21.31    | 8.22  | 8.41  | 0.49 | 0.45 | -0.19 | 4.51E-05 | 8.17E-04 | (B) TP53 wild in GC |
| PLK2      | 5q11.2     | 9.11  | 9.54  | 1.01 | 1.11 | -0.43 | 4.67E-05 | 8.38E-04 | (B) TP53 wild in GC |
| EOGT      | 3p14.1     | 9.02  | 9.3   | 0.66 | 0.74 | -0.29 | 4.67E-05 | 8.38E-04 | (B) TP53 wild in GC |
| UBE2G2    | 21q22.3    | 9.78  | 9.97  | 0.49 | 0.43 | -0.19 | 4.70E-05 | 8.41E-04 | (B) TP53 wild in GC |
| GIMAP6    | 7q36.1     | 8.17  | 8.6   | 0.97 | 1.15 | -0.43 | 4.71E-05 | 8.41E-04 | (B) TP53 wild in GC |
| TUBGCP2   | 10q26.3    | 10.4  | 10.56 | 0.4  | 0.37 | -0.16 | 4.72E-05 | 8.41E-04 | (B) TP53 wild in GC |
| CDC14B    | 9q22.32-q2 | 8.91  | 9.16  | 0.65 | 0.6  | -0.26 | 4.74E-05 | 8.43E-04 | (B) TP53 wild in GC |
| TNFRSF10B | 8p21.3     | 10.41 | 10.71 | 0.78 | 0.69 | -0.3  | 4.76E-05 | 8.45E-04 | (B) TP53 wild in GC |
| MTMR6     | 13q12.13   | 9.64  | 9.86  | 0.56 | 0.48 | -0.22 | 5.09E-05 | 8.91E-04 | (B) TP53 wild in GC |
| EDEM1     | 3p26.1     | 10.14 | 10.39 | 0.62 | 0.6  | -0.25 | 5.17E-05 | 9.00E-04 | (B) TP53 wild in GC |
| GNG2      | 14q22.1    | 8.28  | 8.67  | 0.97 | 1    | -0.4  | 5.27E-05 | 9.14E-04 | (B) TP53 wild in GC |
| ZNF654    | 3p11.1     | 8.19  | 8.4   | 0.52 | 0.5  | -0.21 | 5.28E-05 | 9.14E-04 | (B) TP53 wild in GC |
| KIAA0753  | 17p13.1    | 8.35  | 8.56  | 0.5  | 0.54 | -0.21 | 5.30E-05 | 9.15E-04 | (B) TP53 wild in GC |
| C3ORF38   | 3p11.1     | 8.73  | 8.89  | 0.42 | 0.38 | -0.16 | 5.54E-05 | 9.48E-04 | (B) TP53 wild in GC |
| SREK1IP1  | 5q12.3     | 9.71  | 9.98  | 0.73 | 0.57 | -0.27 | 5.61E-05 | 9.57E-04 | (B) TP53 wild in GC |
| LCP2      | 5q35.1     | 8.73  | 9.15  | 0.99 | 1.1  | -0.42 | 5.65E-05 | 9.62E-04 | (B) TP53 wild in GC |

|         |            |       |       |      |      |       |          |          |                     |
|---------|------------|-------|-------|------|------|-------|----------|----------|---------------------|
| ZNF204P | 6p22.1     | 6.14  | 6.75  | 1.69 | 1.21 | -0.61 | 5.68E-05 | 9.66E-04 | (B) TP53 wild in GC |
| NFKB1   | 4q24       | 10.43 | 10.61 | 0.47 | 0.45 | -0.19 | 5.70E-05 | 9.68E-04 | (B) TP53 wild in GC |
| DCP1B   | 12p13.33   | 8.55  | 8.81  | 0.64 | 0.64 | -0.26 | 5.92E-05 | 9.99E-04 | (B) TP53 wild in GC |
| IRF2    | 4q35.1     | 9.89  | 10.08 | 0.45 | 0.46 | -0.18 | 5.94E-05 | 9.99E-04 | (B) TP53 wild in GC |
| COPS2   | 15q21.1    | 10.25 | 10.42 | 0.4  | 0.44 | -0.17 | 5.94E-05 | 9.99E-04 | (B) TP53 wild in GC |
| STN1    | 10q24.33   | 8.9   | 9.13  | 0.58 | 0.57 | -0.23 | 5.94E-05 | 9.99E-04 | (B) TP53 wild in GC |
| MIAT    | 22q12.1    | 6.79  | 7.3   | 1.21 | 1.3  | -0.5  | 6.01E-05 | 1.01E-03 | (B) TP53 wild in GC |
| ALPK1   | 4q25       | 8.37  | 8.7   | 0.87 | 0.76 | -0.33 | 6.06E-05 | 1.01E-03 | (B) TP53 wild in GC |
| SYNJ2BP | 14q24.2    | 10.2  | 10.4  | 0.49 | 0.51 | -0.2  | 6.16E-05 | 1.03E-03 | (B) TP53 wild in GC |
| SH2D1A  | Xq25       | 5.1   | 5.74  | 1.58 | 1.59 | -0.64 | 6.16E-05 | 1.03E-03 | (B) TP53 wild in GC |
| WDR36   | 5q22.1     | 9.82  | 10.03 | 0.55 | 0.52 | -0.22 | 6.16E-05 | 1.03E-03 | (B) TP53 wild in GC |
| WDR48   | 3p22.2     | 9.45  | 9.66  | 0.54 | 0.46 | -0.2  | 6.19E-05 | 1.03E-03 | (B) TP53 wild in GC |
| STAT4   | 2q32.2-q32 | 5.57  | 6.07  | 1.23 | 1.28 | -0.5  | 6.33E-05 | 1.05E-03 | (B) TP53 wild in GC |
| FOXJ2   | 12p13.31   | 9.5   | 9.72  | 0.57 | 0.5  | -0.22 | 6.34E-05 | 1.05E-03 | (B) TP53 wild in GC |
| GRAP2   | 22q13.1    | 5.09  | 5.69  | 1.51 | 1.48 | -0.6  | 6.35E-05 | 1.05E-03 | (B) TP53 wild in GC |
| UHRF2   | 9p24.1     | 9.12  | 9.39  | 0.71 | 0.6  | -0.27 | 6.37E-05 | 1.05E-03 | (B) TP53 wild in GC |



|          |            |       |       |      |      |       |          |          |                     |
|----------|------------|-------|-------|------|------|-------|----------|----------|---------------------|
| ZAP70    | 2q11.2     | 6.27  | 6.88  | 1.55 | 1.5  | -0.61 | 6.56E-05 | 1.08E-03 | (B) TP53 wild in GC |
| DTWD2    | 5q23.1     | 7.84  | 8.09  | 0.64 | 0.61 | -0.25 | 6.72E-05 | 1.09E-03 | (B) TP53 wild in GC |
| PLEKHA2  | 8p11.22    | 9.76  | 10.05 | 0.7  | 0.72 | -0.28 | 6.82E-05 | 1.11E-03 | (B) TP53 wild in GC |
| SLAMF6   | 1q23.2-q23 | 6.51  | 7.13  | 1.51 | 1.59 | -0.62 | 6.84E-05 | 1.11E-03 | (B) TP53 wild in GC |
| MAT2B    | 5q34       | 10.32 | 10.51 | 0.5  | 0.49 | -0.2  | 6.97E-05 | 1.12E-03 | (B) TP53 wild in GC |
| ZNF655   | 7q22.1     | 9.12  | 9.61  | 1.25 | 1.19 | -0.49 | 7.13E-05 | 1.15E-03 | (B) TP53 wild in GC |
| MS4A7    | 11q12.2    | 8.15  | 8.66  | 1.19 | 1.35 | -0.5  | 7.15E-05 | 1.15E-03 | (B) TP53 wild in GC |
| CRBN     | 3p26.2     | 8.8   | 8.99  | 0.48 | 0.51 | -0.2  | 7.25E-05 | 1.16E-03 | (B) TP53 wild in GC |
| SH3BGRL  | Xq21.1     | 10.99 | 11.38 | 0.95 | 1.02 | -0.39 | 7.26E-05 | 1.16E-03 | (B) TP53 wild in GC |
| TCAIM    | 3p21.31    | 9.09  | 9.27  | 0.47 | 0.45 | -0.18 | 7.28E-05 | 1.16E-03 | (B) TP53 wild in GC |
| ARHGAP15 | 2q22.2-q22 | 6.22  | 6.74  | 1.29 | 1.35 | -0.52 | 7.60E-05 | 1.20E-03 | (B) TP53 wild in GC |
| SHOC2    | 10q25.2    | 10.02 | 10.18 | 0.42 | 0.4  | -0.16 | 7.62E-05 | 1.20E-03 | (B) TP53 wild in GC |
| NIN      | 14q22.1    | 9.24  | 9.6   | 0.88 | 0.96 | -0.36 | 7.63E-05 | 1.20E-03 | (B) TP53 wild in GC |
| SERPINB8 | 18q22.1    | 8.44  | 8.78  | 0.91 | 0.81 | -0.34 | 7.67E-05 | 1.21E-03 | (B) TP53 wild in GC |
| ZNF25    | 10p11.21   | 7.32  | 7.64  | 0.75 | 0.88 | -0.32 | 7.75E-05 | 1.22E-03 | (B) TP53 wild in GC |
| COX18    | 4q13.3     | 8.13  | 8.34  | 0.53 | 0.5  | -0.21 | 7.93E-05 | 1.24E-03 | (B) TP53 wild in GC |

|          |            |       |       |      |      |       |          |          |                     |
|----------|------------|-------|-------|------|------|-------|----------|----------|---------------------|
| SLA2     | 20q11.23   | 5.64  | 6.18  | 1.37 | 1.38 | -0.55 | 7.96E-05 | 1.24E-03 | (B) TP53 wild in GC |
| DCP2     | 5q22.2     | 9.32  | 9.54  | 0.57 | 0.55 | -0.22 | 8.27E-05 | 1.27E-03 | (B) TP53 wild in GC |
| PTPRC    | 1q31.3-q32 | 9.6   | 10.18 | 1.44 | 1.48 | -0.57 | 8.40E-05 | 1.29E-03 | (B) TP53 wild in GC |
| TXNIP    | 1q21.1     | 12.69 | 13.13 | 1.08 | 1.16 | -0.44 | 8.41E-05 | 1.29E-03 | (B) TP53 wild in GC |
| CCL5     | 17q12      | 9.07  | 9.67  | 1.49 | 1.58 | -0.6  | 8.55E-05 | 1.31E-03 | (B) TP53 wild in GC |
| ERAP1    | 5q15       | 10.9  | 11.2  | 0.8  | 0.7  | -0.3  | 8.88E-05 | 1.35E-03 | (B) TP53 wild in GC |
| ZBTB1    | 14q23.3    | 9.55  | 9.72  | 0.44 | 0.42 | -0.17 | 9.05E-05 | 1.37E-03 | (B) TP53 wild in GC |
| CD6      | 11q12.2    | 7.22  | 7.73  | 1.27 | 1.33 | -0.51 | 9.16E-05 | 1.38E-03 | (B) TP53 wild in GC |
| MIR155HG | -          | 4.46  | 4.98  | 1.3  | 1.34 | -0.52 | 9.30E-05 | 1.40E-03 | (B) TP53 wild in GC |
| S1PR4    | 19p13.3    | 5.51  | 6.02  | 1.25 | 1.4  | -0.51 | 9.48E-05 | 1.42E-03 | (B) TP53 wild in GC |
| DOCK10   | 2q36.2     | 7.75  | 8.26  | 1.28 | 1.33 | -0.51 | 9.48E-05 | 1.42E-03 | (B) TP53 wild in GC |
| ZDHHC3   | 3p21.31    | 10.91 | 11.1  | 0.47 | 0.49 | -0.19 | 9.60E-05 | 1.44E-03 | (B) TP53 wild in GC |
| CDC37L1  | 9p24.1     | 7.51  | 7.74  | 0.6  | 0.56 | -0.23 | 9.64E-05 | 1.44E-03 | (B) TP53 wild in GC |
| CYTIP    | 2q24.1     | 7.71  | 8.21  | 1.26 | 1.28 | -0.5  | 9.72E-05 | 1.45E-03 | (B) TP53 wild in GC |
| CD226    | 18q22.2    | 4.23  | 4.81  | 1.53 | 1.42 | -0.58 | 9.75E-05 | 1.45E-03 | (B) TP53 wild in GC |
| IL10RA   | 11q23.3    | 8.5   | 9.01  | 1.31 | 1.31 | -0.51 | 9.84E-05 | 1.46E-03 | (B) TP53 wild in GC |

|           |          |       |       |      |      |       |          |          |                     |
|-----------|----------|-------|-------|------|------|-------|----------|----------|---------------------|
| FAM169A   | 5q13.3   | 6.74  | 7.28  | 1.43 | 1.28 | -0.53 | 9.93E-05 | 1.47E-03 | (B) TP53 wild in GC |
| PAXIP1-AS | 7q36.2   | 6.24  | 6.56  | 0.83 | 0.75 | -0.31 | 9.99E-05 | 1.47E-03 | (B) TP53 wild in GC |
| SGCB      | 4q12     | 9.78  | 10.05 | 0.68 | 0.72 | -0.27 | 1.00E-04 | 1.47E-03 | (B) TP53 wild in GC |
| CD3D      | 11q23.3  | 6.51  | 7.08  | 1.47 | 1.45 | -0.57 | 1.01E-04 | 1.49E-03 | (B) TP53 wild in GC |
| GIMAP5    | 7q36.1   | 7.48  | 7.91  | 1.05 | 1.19 | -0.43 | 1.02E-04 | 1.49E-03 | (B) TP53 wild in GC |
| C1RL      | 12p13.31 | 9.48  | 9.76  | 0.74 | 0.69 | -0.28 | 1.04E-04 | 1.52E-03 | (B) TP53 wild in GC |
| MAP4K1    | 19q13.2  | 6.44  | 7.07  | 1.7  | 1.53 | -0.63 | 1.04E-04 | 1.52E-03 | (B) TP53 wild in GC |
| RGS10     | 10q26.11 | 8.46  | 8.78  | 0.83 | 0.78 | -0.31 | 1.05E-04 | 1.53E-03 | (B) TP53 wild in GC |
| CCR5      | 3p21.31  | 6.66  | 7.19  | 1.34 | 1.44 | -0.54 | 1.05E-04 | 1.53E-03 | (B) TP53 wild in GC |
| IKZF1     | 7p12.2   | 8.18  | 8.73  | 1.37 | 1.49 | -0.55 | 1.06E-04 | 1.54E-03 | (B) TP53 wild in GC |
| PPP1R16B  | 20q11.23 | 8     | 8.51  | 1.26 | 1.42 | -0.52 | 1.09E-04 | 1.58E-03 | (B) TP53 wild in GC |
| ST8SIA1   | 12p12.1  | 5.16  | 5.69  | 1.24 | 1.49 | -0.52 | 1.09E-04 | 1.58E-03 | (B) TP53 wild in GC |
| CRK       | 17p13.3  | 10.09 | 10.24 | 0.39 | 0.35 | -0.15 | 1.09E-04 | 1.58E-03 | (B) TP53 wild in GC |
| UIMC1     | 5q35.2   | 8.26  | 8.41  | 0.42 | 0.38 | -0.16 | 1.12E-04 | 1.61E-03 | (B) TP53 wild in GC |
| IFI16     | 1q23.1   | 10.51 | 10.92 | 1.03 | 1.07 | -0.41 | 1.12E-04 | 1.61E-03 | (B) TP53 wild in GC |
| EVL       | 14q32.2  | 9.17  | 9.56  | 0.97 | 1.04 | -0.39 | 1.15E-04 | 1.64E-03 | (B) TP53 wild in GC |

|          |         |       |       |      |      |       |          |          |                     |
|----------|---------|-------|-------|------|------|-------|----------|----------|---------------------|
| RABGAP1L | 1q25.1  | 8.69  | 8.93  | 0.6  | 0.63 | -0.24 | 1.16E-04 | 1.65E-03 | (B) TP53 wild in GC |
| C5ORF24  | 5q31.1  | 10.3  | 10.48 | 0.46 | 0.48 | -0.18 | 1.16E-04 | 1.66E-03 | (B) TP53 wild in GC |
| YBEY     | 21q22.3 | 6.69  | 7     | 0.84 | 0.81 | -0.32 | 1.22E-04 | 1.72E-03 | (B) TP53 wild in GC |
| KIAA1109 | 4q27    | 10.34 | 10.59 | 0.63 | 0.67 | -0.25 | 1.22E-04 | 1.72E-03 | (B) TP53 wild in GC |
| CXCR4    | 2q22.1  | 10.09 | 10.55 | 1.21 | 1.21 | -0.47 | 1.22E-04 | 1.73E-03 | (B) TP53 wild in GC |
| TRAK1    | 3p22.1  | 11.28 | 11.55 | 0.72 | 0.71 | -0.28 | 1.24E-04 | 1.74E-03 | (B) TP53 wild in GC |
| CLK4     | 5q35.3  | 8.13  | 8.37  | 0.67 | 0.6  | -0.25 | 1.24E-04 | 1.74E-03 | (B) TP53 wild in GC |
| CCSER2   | 10q23.1 | 10.03 | 10.27 | 0.6  | 0.71 | -0.25 | 1.25E-04 | 1.75E-03 | (B) TP53 wild in GC |
| DHX29    | 5q11.2  | 9.46  | 9.63  | 0.46 | 0.44 | -0.17 | 1.25E-04 | 1.75E-03 | (B) TP53 wild in GC |
| SLC35E3  | 12q15   | 7.49  | 7.75  | 0.59 | 0.78 | -0.26 | 1.25E-04 | 1.75E-03 | (B) TP53 wild in GC |
| CD247    | 1q24.2  | 5.75  | 6.25  | 1.31 | 1.32 | -0.51 | 1.26E-04 | 1.76E-03 | (B) TP53 wild in GC |
| ST8SIA4  | 5q21.1  | 7.68  | 8.05  | 0.94 | 1.01 | -0.37 | 1.30E-04 | 1.81E-03 | (B) TP53 wild in GC |
| SLFN5    | 17q12   | 9.2   | 9.58  | 1.01 | 0.99 | -0.38 | 1.31E-04 | 1.83E-03 | (B) TP53 wild in GC |
| VPS53    | 17p13.3 | 10.13 | 10.31 | 0.46 | 0.48 | -0.18 | 1.32E-04 | 1.83E-03 | (B) TP53 wild in GC |
| GIMAP4   | 7q36.1  | 8.68  | 9.07  | 0.97 | 1.1  | -0.39 | 1.32E-04 | 1.83E-03 | (B) TP53 wild in GC |
| TLE4     | 9q21.31 | 8.47  | 8.85  | 1.01 | 0.94 | -0.38 | 1.33E-04 | 1.84E-03 | (B) TP53 wild in GC |

|          |          |       |       |      |      |       |          |          |                     |
|----------|----------|-------|-------|------|------|-------|----------|----------|---------------------|
| ITM2A    | Xq21.1   | 7.64  | 8.18  | 1.39 | 1.45 | -0.54 | 1.36E-04 | 1.88E-03 | (B) TP53 wild in GC |
| FAM13A   | 4q22.1   | 8.67  | 9.08  | 1.11 | 1.06 | -0.42 | 1.42E-04 | 1.95E-03 | (B) TP53 wild in GC |
| TSPYL1   | 6q22.1   | 10.57 | 10.76 | 0.53 | 0.46 | -0.19 | 1.42E-04 | 1.95E-03 | (B) TP53 wild in GC |
| STAT2    | 12q13.3  | 10.56 | 10.79 | 0.6  | 0.57 | -0.22 | 1.43E-04 | 1.96E-03 | (B) TP53 wild in GC |
| LYSMD3   | 5q14.3   | 9.06  | 9.25  | 0.51 | 0.46 | -0.19 | 1.46E-04 | 1.99E-03 | (B) TP53 wild in GC |
| CYTH1    | 17q25.3  | 9.74  | 9.93  | 0.51 | 0.51 | -0.19 | 1.47E-04 | 2.00E-03 | (B) TP53 wild in GC |
| CCDC171  | 9p22.3   | 5.07  | 5.45  | 1.02 | 0.98 | -0.38 | 1.47E-04 | 2.00E-03 | (B) TP53 wild in GC |
| NDEL1    | 17p13.1  | 9.53  | 9.69  | 0.44 | 0.42 | -0.16 | 1.48E-04 | 2.01E-03 | (B) TP53 wild in GC |
| EVI2B    | 17q11.2  | 8.96  | 9.48  | 1.27 | 1.44 | -0.51 | 1.49E-04 | 2.01E-03 | (B) TP53 wild in GC |
| GIMAP7   | 7q36.1   | 7.32  | 7.76  | 1.06 | 1.28 | -0.44 | 1.52E-04 | 2.04E-03 | (B) TP53 wild in GC |
| G3BP2    | 4q21.1   | 11.46 | 11.63 | 0.46 | 0.45 | -0.17 | 1.53E-04 | 2.06E-03 | (B) TP53 wild in GC |
| EIF4A2   | 3q27.3   | 12.4  | 12.62 | 0.63 | 0.52 | -0.22 | 1.55E-04 | 2.07E-03 | (B) TP53 wild in GC |
| TRAPPC6B | 14q21.1  | 8.81  | 8.97  | 0.45 | 0.39 | -0.16 | 1.55E-04 | 2.07E-03 | (B) TP53 wild in GC |
| PPWD1    | 5q12.3   | 8.23  | 8.4   | 0.48 | 0.43 | -0.17 | 1.55E-04 | 2.07E-03 | (B) TP53 wild in GC |
| PARP11   | 12p13.32 | 7.36  | 7.67  | 0.85 | 0.74 | -0.31 | 1.57E-04 | 2.10E-03 | (B) TP53 wild in GC |
| MYO1F    | 19p13.2  | 8.24  | 8.65  | 1.04 | 1.13 | -0.41 | 1.58E-04 | 2.10E-03 | (B) TP53 wild in GC |

|          |          |       |       |      |      |       |          |          |                     |
|----------|----------|-------|-------|------|------|-------|----------|----------|---------------------|
| EVI2A    | 17q11.2  | 7.09  | 7.55  | 1.17 | 1.26 | -0.46 | 1.62E-04 | 2.15E-03 | (B) TP53 wild in GC |
| ZFP14    | 19q13.12 | 6.96  | 7.27  | 0.86 | 0.73 | -0.31 | 1.64E-04 | 2.16E-03 | (B) TP53 wild in GC |
| FYCO1    | 3p21.31  | 10.25 | 10.56 | 0.75 | 0.88 | -0.3  | 1.64E-04 | 2.16E-03 | (B) TP53 wild in GC |
| ARL14EP  | 11p14.1  | 8.33  | 8.52  | 0.48 | 0.48 | -0.18 | 1.65E-04 | 2.17E-03 | (B) TP53 wild in GC |
| TRMO     | 9q22.33  | 7.45  | 7.62  | 0.47 | 0.42 | -0.17 | 1.65E-04 | 2.17E-03 | (B) TP53 wild in GC |
| RPL15    | 3p24.2   | 13.65 | 13.86 | 0.53 | 0.53 | -0.2  | 1.65E-04 | 2.17E-03 | (B) TP53 wild in GC |
| IL6ST    | 5q11.2   | 9.74  | 10.17 | 1.06 | 1.24 | -0.43 | 1.69E-04 | 2.20E-03 | (B) TP53 wild in GC |
| SMARCD1  | 4q22.3   | 9.67  | 9.87  | 0.55 | 0.54 | -0.21 | 1.71E-04 | 2.22E-03 | (B) TP53 wild in GC |
| CHURC1 1 | 4q23.3   | 10.15 | 10.33 | 0.49 | 0.51 | -0.19 | 1.71E-04 | 2.22E-03 | (B) TP53 wild in GC |
| DIMT1    | 5q12.1   | 8.84  | 9.01  | 0.44 | 0.46 | -0.17 | 1.72E-04 | 2.22E-03 | (B) TP53 wild in GC |
| SAP30L   | 5q33.2   | 9.39  | 9.58  | 0.53 | 0.47 | -0.19 | 1.73E-04 | 2.23E-03 | (B) TP53 wild in GC |
| GIMAP8   | 7q36.1   | 7.4   | 7.79  | 0.95 | 1.13 | -0.39 | 1.76E-04 | 2.25E-03 | (B) TP53 wild in GC |
| PML 1    | 5q24.1   | 11.38 | 11.63 | 0.66 | 0.67 | -0.25 | 1.78E-04 | 2.27E-03 | (B) TP53 wild in GC |
| SLC30A9  | 4p13     | 10.14 | 10.31 | 0.46 | 0.42 | -0.17 | 1.82E-04 | 2.31E-03 | (B) TP53 wild in GC |
| VCL      | 10q22.2  | 12.21 | 12.51 | 0.77 | 0.86 | -0.3  | 1.83E-04 | 2.31E-03 | (B) TP53 wild in GC |
| TESPA1   | 12q13.2  | 4.27  | 4.91  | 1.67 | 1.71 | -0.63 | 1.83E-04 | 2.31E-03 | (B) TP53 wild in GC |

|          |          |       |       |      |      |       |          |          |                     |
|----------|----------|-------|-------|------|------|-------|----------|----------|---------------------|
| CTSO     | 4q32.1   | 9.11  | 9.47  | 0.98 | 0.9  | -0.36 | 1.84E-04 | 2.32E-03 | (B) TP53 wild in GC |
| TNFSF9   | 19p13.3  | 5.84  | 6.57  | 1.82 | 2.07 | -0.72 | 1.85E-04 | 2.34E-03 | (B) TP53 wild in GC |
| KLRA1P   | 12p13.2  | 4.19  | 4.63  | 1.17 | 1.16 | -0.44 | 1.86E-04 | 2.35E-03 | (B) TP53 wild in GC |
| RNF125   | 18q12.1  | 8.02  | 8.41  | 1.08 | 0.98 | -0.39 | 1.88E-04 | 2.37E-03 | (B) TP53 wild in GC |
| KDM3B    | 5q31.2   | 11.08 | 11.24 | 0.43 | 0.43 | -0.16 | 1.90E-04 | 2.39E-03 | (B) TP53 wild in GC |
| BDP1     | 5q13.2   | 10    | 10.22 | 0.6  | 0.55 | -0.22 | 1.94E-04 | 2.42E-03 | (B) TP53 wild in GC |
| RUNX1    | 21q22.12 | 11.21 | 11.45 | 0.61 | 0.73 | -0.25 | 1.99E-04 | 2.47E-03 | (B) TP53 wild in GC |
| BIN2     | 12q13.13 | 7.35  | 7.76  | 1.04 | 1.17 | -0.41 | 2.00E-04 | 2.48E-03 | (B) TP53 wild in GC |
| CHRFAM7A | 15q13.2  | 5.15  | 5.81  | 1.8  | 1.72 | -0.66 | 2.01E-04 | 2.49E-03 | (B) TP53 wild in GC |
| HIF1AN   | 10q24.31 | 9.77  | 9.95  | 0.49 | 0.47 | -0.18 | 2.01E-04 | 2.49E-03 | (B) TP53 wild in GC |
| PVRIG    | 7q22.1   | 6.28  | 6.7   | 1.08 | 1.15 | -0.41 | 2.02E-04 | 2.49E-03 | (B) TP53 wild in GC |
| ARHGAP9  | 12q13.3  | 7.24  | 7.7   | 1.2  | 1.27 | -0.46 | 2.03E-04 | 2.50E-03 | (B) TP53 wild in GC |
| GPR18    | 13q32.3  | 3.88  | 4.38  | 1.23 | 1.5  | -0.5  | 2.07E-04 | 2.54E-03 | (B) TP53 wild in GC |
| ENTPD1   | 10q24.1  | 10.39 | 10.65 | 0.65 | 0.77 | -0.26 | 2.07E-04 | 2.54E-03 | (B) TP53 wild in GC |
| NR2F2    | 15q26.2  | 10.67 | 11    | 0.86 | 0.91 | -0.33 | 2.14E-04 | 2.60E-03 | (B) TP53 wild in GC |
| PPM1A    | 14q23.1  | 10.16 | 10.32 | 0.43 | 0.45 | -0.16 | 2.14E-04 | 2.60E-03 | (B) TP53 wild in GC |

|          |         |       |       |      |      |       |          |          |                     |
|----------|---------|-------|-------|------|------|-------|----------|----------|---------------------|
| MAST4    | 5q12.3  | 8.93  | 9.28  | 0.92 | 1    | -0.35 | 2.15E-04 | 2.60E-03 | (B) TP53 wild in GC |
| FNBP1    | 9q34.11 | 9.81  | 10.26 | 1.14 | 1.34 | -0.45 | 2.15E-04 | 2.61E-03 | (B) TP53 wild in GC |
| MIER1    | 1p31.3  | 10.3  | 10.46 | 0.41 | 0.41 | -0.15 | 2.22E-04 | 2.67E-03 | (B) TP53 wild in GC |
| DAB2IP   | 9q33.2  | 11.05 | 11.32 | 0.76 | 0.69 | -0.27 | 2.23E-04 | 2.67E-03 | (B) TP53 wild in GC |
| PAM      | 5q21.1  | 10.85 | 11.16 | 0.81 | 0.89 | -0.31 | 2.27E-04 | 2.72E-03 | (B) TP53 wild in GC |
| C14ORF28 | 14q21.2 | 6.62  | 6.87  | 0.67 | 0.68 | -0.25 | 2.28E-04 | 2.72E-03 | (B) TP53 wild in GC |
| ARAP2    | 4p14    | 8.77  | 9.11  | 0.96 | 0.83 | -0.34 | 2.34E-04 | 2.79E-03 | (B) TP53 wild in GC |
| SFMBT2   | 10p14   | 5.53  | 6.04  | 1.33 | 1.46 | -0.51 | 2.40E-04 | 2.84E-03 | (B) TP53 wild in GC |
| RPP14    | 3p14.3  | 8.97  | 9.11  | 0.39 | 0.38 | -0.14 | 2.41E-04 | 2.84E-03 | (B) TP53 wild in GC |
| MAN2A1   | 5q21.3  | 9.66  | 9.94  | 0.76 | 0.75 | -0.28 | 2.41E-04 | 2.84E-03 | (B) TP53 wild in GC |
| ZNF624 1 | 7p11.2  | 6.44  | 6.66  | 0.62 | 0.58 | -0.22 | 2.41E-04 | 2.84E-03 | (B) TP53 wild in GC |
| RASGRP1  | 15q14   | 6.99  | 7.49  | 1.42 | 1.22 | -0.49 | 2.41E-04 | 2.85E-03 | (B) TP53 wild in GC |
| ARHGAP1  | 11p11.2 | 11.8  | 11.98 | 0.47 | 0.5  | -0.18 | 2.44E-04 | 2.86E-03 | (B) TP53 wild in GC |
| ATG12    | 5q22.3  | 8.85  | 9.01  | 0.46 | 0.43 | -0.16 | 2.46E-04 | 2.89E-03 | (B) TP53 wild in GC |
| ITGAL    | 16p11.2 | 8.42  | 8.95  | 1.43 | 1.49 | -0.54 | 2.47E-04 | 2.90E-03 | (B) TP53 wild in GC |
| LSM11    | 5q33.3  | 7.47  | 7.68  | 0.55 | 0.59 | -0.21 | 2.48E-04 | 2.91E-03 | (B) TP53 wild in GC |



|          |            |       |      |      |      |       |          |          |                     |
|----------|------------|-------|------|------|------|-------|----------|----------|---------------------|
| GM2A     | 5q33.1     | 10.63 | 10.9 | 0.76 | 0.69 | -0.27 | 2.50E-04 | 2.93E-03 | (B) TP53 wild in GC |
| JKAMP    | 14q23.1    | 9.57  | 9.73 | 0.46 | 0.44 | -0.16 | 2.54E-04 | 2.97E-03 | (B) TP53 wild in GC |
| FAM78A   | 9q34.13    | 7.3   | 7.68 | 1.02 | 1.03 | -0.38 | 2.55E-04 | 2.97E-03 | (B) TP53 wild in GC |
| NCKAP1L  | 12q13.13-q | 8.22  | 8.74 | 1.48 | 1.38 | -0.53 | 2.57E-04 | 2.99E-03 | (B) TP53 wild in GC |
| MIER3    | 5q11.2     | 9.11  | 9.31 | 0.56 | 0.54 | -0.2  | 2.57E-04 | 2.99E-03 | (B) TP53 wild in GC |
| TVP23B   | 17p11.2    | 9.09  | 9.31 | 0.63 | 0.56 | -0.22 | 2.60E-04 | 3.02E-03 | (B) TP53 wild in GC |
| SLF1     | 5q15       | 6.96  | 7.18 | 0.62 | 0.58 | -0.22 | 2.62E-04 | 3.04E-03 | (B) TP53 wild in GC |
| RNF144B  | 6p22.3     | 8     | 8.39 | 1.04 | 1.11 | -0.39 | 2.63E-04 | 3.05E-03 | (B) TP53 wild in GC |
| TMX3     | 18q22.1    | 9.51  | 9.73 | 0.62 | 0.56 | -0.22 | 2.72E-04 | 3.13E-03 | (B) TP53 wild in GC |
| GMFG     | 19q13.2    | 7.2   | 7.55 | 0.93 | 1.01 | -0.35 | 2.77E-04 | 3.17E-03 | (B) TP53 wild in GC |
| TRIAP1   | 12q24.31   | 8.63  | 8.81 | 0.47 | 0.54 | -0.18 | 2.78E-04 | 3.18E-03 | (B) TP53 wild in GC |
| FOXO1    | 13q14.11   | 9.66  | 9.98 | 0.87 | 0.84 | -0.31 | 2.80E-04 | 3.20E-03 | (B) TP53 wild in GC |
| PIK3CG   | 7q22.3     | 6.7   | 7.27 | 1.52 | 1.59 | -0.56 | 2.80E-04 | 3.20E-03 | (B) TP53 wild in GC |
| TNFSF13B | 13q33.3    | 6.38  | 6.84 | 1.29 | 1.25 | -0.46 | 2.81E-04 | 3.20E-03 | (B) TP53 wild in GC |
| TAGAP    | 6q25.3     | 7.08  | 7.59 | 1.4  | 1.46 | -0.52 | 2.87E-04 | 3.26E-03 | (B) TP53 wild in GC |
| RPL13A   | 19q13.33   | 12.05 | 12.3 | 0.72 | 0.65 | -0.25 | 2.93E-04 | 3.31E-03 | (B) TP53 wild in GC |

|         |            |       |       |      |      |       |          |          |                     |
|---------|------------|-------|-------|------|------|-------|----------|----------|---------------------|
| CFAP36  | 2p16.1     | 8.84  | 9.04  | 0.57 | 0.52 | -0.2  | 2.96E-04 | 3.34E-03 | (B) TP53 wild in GC |
| CDK17   | 12q23.1    | 9.15  | 9.34  | 0.48 | 0.55 | -0.19 | 2.98E-04 | 3.36E-03 | (B) TP53 wild in GC |
| NRIP1   | 21q11.2-q2 | 10.1  | 10.33 | 0.68 | 0.58 | -0.23 | 2.99E-04 | 3.36E-03 | (B) TP53 wild in GC |
| DUT     | 15q21.1    | 9.5   | 9.7   | 0.56 | 0.53 | -0.2  | 2.99E-04 | 3.36E-03 | (B) TP53 wild in GC |
| RPS3A   | 4q31.3     | 11.31 | 11.56 | 0.73 | 0.69 | -0.26 | 3.00E-04 | 3.36E-03 | (B) TP53 wild in GC |
| C1ORF54 | 1q21.2     | 6.19  | 6.52  | 0.88 | 0.94 | -0.33 | 3.01E-04 | 3.36E-03 | (B) TP53 wild in GC |
| BACH1   | 21q21.3    | 9.87  | 10.08 | 0.57 | 0.61 | -0.21 | 3.01E-04 | 3.36E-03 | (B) TP53 wild in GC |
| ZNF658  | 9q21.11    | 4.97  | 5.34  | 1.02 | 0.99 | -0.37 | 3.01E-04 | 3.36E-03 | (B) TP53 wild in GC |
| CEP85L  | 6q22.31    | 5.25  | 5.69  | 1.19 | 1.2  | -0.43 | 3.02E-04 | 3.36E-03 | (B) TP53 wild in GC |
| IL7R    | 5p13.2     | 6.88  | 7.43  | 1.47 | 1.57 | -0.55 | 3.02E-04 | 3.36E-03 | (B) TP53 wild in GC |
| MS4A6A  | 11q12.2    | 8.59  | 9.05  | 1.23 | 1.32 | -0.46 | 3.03E-04 | 3.37E-03 | (B) TP53 wild in GC |
| CYTH4   | 22q13.1    | 7.58  | 8     | 1.13 | 1.2  | -0.42 | 3.06E-04 | 3.39E-03 | (B) TP53 wild in GC |
| RASSF2  | 20p13      | 8.71  | 9.15  | 1.16 | 1.3  | -0.44 | 3.06E-04 | 3.39E-03 | (B) TP53 wild in GC |
| ZNF35   | 3p21.31    | 7.47  | 7.63  | 0.46 | 0.41 | -0.16 | 3.07E-04 | 3.40E-03 | (B) TP53 wild in GC |
| GFM2    | 5q13.3     | 8.94  | 9.12  | 0.51 | 0.53 | -0.19 | 3.15E-04 | 3.47E-03 | (B) TP53 wild in GC |
| PCNX1   | 14q24.2    | 10.29 | 10.51 | 0.56 | 0.66 | -0.22 | 3.16E-04 | 3.48E-03 | (B) TP53 wild in GC |

|         |         |       |       |      |      |       |          |          |                     |
|---------|---------|-------|-------|------|------|-------|----------|----------|---------------------|
| SRSF5   | 14q24.1 | 11.01 | 11.17 | 0.44 | 0.45 | -0.16 | 3.18E-04 | 3.49E-03 | (B) TP53 wild in GC |
| RPL36AL | 14q21.3 | 11.27 | 11.49 | 0.64 | 0.58 | -0.22 | 3.18E-04 | 3.49E-03 | (B) TP53 wild in GC |
| TNPO1   | 5q13.2  | 11.24 | 11.4  | 0.46 | 0.44 | -0.16 | 3.23E-04 | 3.52E-03 | (B) TP53 wild in GC |
| TANC1   | 2q24.2  | 10.01 | 10.22 | 0.57 | 0.6  | -0.21 | 3.23E-04 | 3.52E-03 | (B) TP53 wild in GC |
| DOCK2   | 5q35.1  | 8.07  | 8.6   | 1.51 | 1.43 | -0.53 | 3.25E-04 | 3.53E-03 | (B) TP53 wild in GC |
| WIPF1   | 2q31.1  | 10.2  | 10.57 | 0.98 | 1.09 | -0.37 | 3.26E-04 | 3.53E-03 | (B) TP53 wild in GC |
| ARL15   | 5q11.2  | 7.68  | 7.9   | 0.6  | 0.63 | -0.22 | 3.28E-04 | 3.54E-03 | (B) TP53 wild in GC |
| CYFIP1  | 15q11.2 | 11.46 | 11.62 | 0.44 | 0.4  | -0.15 | 3.37E-04 | 3.63E-03 | (B) TP53 wild in GC |
| ZNF596  | 8p23.3  | 5.16  | 5.5   | 0.95 | 0.92 | -0.34 | 3.39E-04 | 3.64E-03 | (B) TP53 wild in GC |
| FBXW2   | 9q33.2  | 10.47 | 10.62 | 0.43 | 0.41 | -0.15 | 3.42E-04 | 3.68E-03 | (B) TP53 wild in GC |
| LNPEP   | 5q15    | 8.31  | 8.63  | 0.87 | 0.91 | -0.32 | 3.44E-04 | 3.69E-03 | (B) TP53 wild in GC |
| ANKRD44 | 2q33.1  | 6.38  | 6.89  | 1.42 | 1.4  | -0.51 | 3.44E-04 | 3.69E-03 | (B) TP53 wild in GC |
| PRF1    | 10q22.1 | 7     | 7.49  | 1.39 | 1.32 | -0.49 | 3.46E-04 | 3.70E-03 | (B) TP53 wild in GC |
| YIPF5   | 5q31.3  | 9.77  | 9.93  | 0.45 | 0.47 | -0.16 | 3.48E-04 | 3.71E-03 | (B) TP53 wild in GC |
| LPXN    | 11q12.1 | 8.11  | 8.45  | 0.96 | 0.94 | -0.34 | 3.49E-04 | 3.72E-03 | (B) TP53 wild in GC |
| BLOC1S6 | 15q21.1 | 9.91  | 10.06 | 0.39 | 0.43 | -0.15 | 3.51E-04 | 3.73E-03 | (B) TP53 wild in GC |

|          |            |       |       |      |      |       |          |          |                     |
|----------|------------|-------|-------|------|------|-------|----------|----------|---------------------|
| RHOA     | 3p21.31    | 13.3  | 13.44 | 0.37 | 0.4  | -0.14 | 3.52E-04 | 3.74E-03 | (B) TP53 wild in GC |
| SREBF1   | 17p11.2    | 11.11 | 11.4  | 0.83 | 0.83 | -0.3  | 3.53E-04 | 3.74E-03 | (B) TP53 wild in GC |
| SETX     | 9q34.13    | 11.03 | 11.24 | 0.56 | 0.58 | -0.2  | 3.55E-04 | 3.76E-03 | (B) TP53 wild in GC |
| 1-Mar    | 4q32.2-q32 | 5.83  | 6.29  | 1.26 | 1.3  | -0.46 | 3.64E-04 | 3.84E-03 | (B) TP53 wild in GC |
| PDE4B    | 1p31.3     | 8.33  | 8.77  | 1.19 | 1.25 | -0.43 | 3.71E-04 | 3.90E-03 | (B) TP53 wild in GC |
| MARF1    | 16p13.11   | 10.76 | 10.97 | 0.54 | 0.61 | -0.2  | 3.73E-04 | 3.92E-03 | (B) TP53 wild in GC |
| S1PR2    | 19p13.2    | 7.34  | 7.64  | 0.91 | 0.79 | -0.31 | 3.75E-04 | 3.93E-03 | (B) TP53 wild in GC |
| HAPLN3   | 15q26.1    | 7.91  | 8.32  | 1.13 | 1.17 | -0.41 | 3.75E-04 | 3.93E-03 | (B) TP53 wild in GC |
| CBR4     | 4q32.3     | 8.3   | 8.51  | 0.61 | 0.59 | -0.21 | 3.76E-04 | 3.93E-03 | (B) TP53 wild in GC |
| GGTA1P   | 9q33.2     | 5.78  | 6.26  | 1.29 | 1.44 | -0.48 | 3.79E-04 | 3.96E-03 | (B) TP53 wild in GC |
| LIMD1    | 3p21.31    | 9.81  | 9.99  | 0.51 | 0.52 | -0.18 | 3.82E-04 | 3.98E-03 | (B) TP53 wild in GC |
| PHF21A   | 11p11.2    | 9.26  | 9.48  | 0.64 | 0.58 | -0.22 | 3.82E-04 | 3.98E-03 | (B) TP53 wild in GC |
| ACAP1    | 17p13.1    | 6.4   | 6.91  | 1.41 | 1.48 | -0.51 | 3.83E-04 | 3.98E-03 | (B) TP53 wild in GC |
| JAML     | 11q23.3    | 6.86  | 7.31  | 1.17 | 1.36 | -0.45 | 3.83E-04 | 3.98E-03 | (B) TP53 wild in GC |
| TRAF3IP3 | 1q32.2     | 6.06  | 6.5   | 1.17 | 1.34 | -0.44 | 3.85E-04 | 3.99E-03 | (B) TP53 wild in GC |
| MS4A14   | 11q12.2    | 4.75  | 5.19  | 1.18 | 1.33 | -0.44 | 3.88E-04 | 4.01E-03 | (B) TP53 wild in GC |

|         |            |       |       |      |      |       |          |          |                     |
|---------|------------|-------|-------|------|------|-------|----------|----------|---------------------|
| VPS13C  | 15q22.2    | 10.7  | 10.94 | 0.66 | 0.71 | -0.24 | 3.88E-04 | 4.01E-03 | (B) TP53 wild in GC |
| TMEM64  | 8q21.3     | 8.85  | 9.18  | 0.92 | 0.93 | -0.33 | 3.91E-04 | 4.03E-03 | (B) TP53 wild in GC |
| CHSY1   | 15q26.3    | 9.76  | 9.97  | 0.56 | 0.61 | -0.21 | 3.97E-04 | 4.07E-03 | (B) TP53 wild in GC |
| CD47    | 3q13.12    | 11.08 | 11.3  | 0.6  | 0.66 | -0.22 | 3.98E-04 | 4.07E-03 | (B) TP53 wild in GC |
| TNFSF14 | 19p13.3    | 3.16  | 3.67  | 1.39 | 1.48 | -0.51 | 3.98E-04 | 4.07E-03 | (B) TP53 wild in GC |
| HCLS1   | 3q13.33    | 8.62  | 9.02  | 1.09 | 1.18 | -0.4  | 4.01E-04 | 4.09E-03 | (B) TP53 wild in GC |
| NPM1    | 5q35.1     | 11.79 | 12.03 | 0.66 | 0.66 | -0.23 | 4.02E-04 | 4.09E-03 | (B) TP53 wild in GC |
| RBM5    | 3p21.31    | 10.2  | 10.38 | 0.48 | 0.53 | -0.18 | 4.12E-04 | 4.16E-03 | (B) TP53 wild in GC |
| CARD8   | 19q13.33   | 8.63  | 8.85  | 0.67 | 0.61 | -0.23 | 4.12E-04 | 4.16E-03 | (B) TP53 wild in GC |
| FBXW11  | 5q35.1     | 9.76  | 9.94  | 0.5  | 0.53 | -0.18 | 4.17E-04 | 4.19E-03 | (B) TP53 wild in GC |
| CTSW    | 11q13.1    | 5.75  | 6.41  | 1.93 | 1.81 | -0.66 | 4.17E-04 | 4.19E-03 | (B) TP53 wild in GC |
| SEPTIN6 | Xq24       | 9.45  | 9.81  | 1.07 | 1    | -0.37 | 4.19E-04 | 4.20E-03 | (B) TP53 wild in GC |
| USP25   | 21q21.1    | 9.45  | 9.64  | 0.55 | 0.5  | -0.19 | 4.19E-04 | 4.20E-03 | (B) TP53 wild in GC |
| MED7    | 5q33.3     | 7.4   | 7.56  | 0.48 | 0.42 | -0.16 | 4.23E-04 | 4.22E-03 | (B) TP53 wild in GC |
| TMF1    | 3p14.1     | 10.24 | 10.43 | 0.53 | 0.53 | -0.19 | 4.23E-04 | 4.22E-03 | (B) TP53 wild in GC |
| ATG10   | 5q14.1-q14 | 6.16  | 6.36  | 0.58 | 0.54 | -0.2  | 4.26E-04 | 4.24E-03 | (B) TP53 wild in GC |

|         |            |       |       |      |      |       |          |          |                     |
|---------|------------|-------|-------|------|------|-------|----------|----------|---------------------|
| CD209   | 19p13.2    | 7.24  | 7.76  | 1.4  | 1.52 | -0.51 | 4.29E-04 | 4.26E-03 | (B) TP53 wild in GC |
| RANBP3  | 19p13.3    | 10.16 | 10.3  | 0.42 | 0.38 | -0.14 | 4.33E-04 | 4.29E-03 | (B) TP53 wild in GC |
| GPX8    | 5q11.2     | 8.5   | 8.87  | 0.99 | 1.17 | -0.38 | 4.38E-04 | 4.34E-03 | (B) TP53 wild in GC |
| PALLD   | 4q32.3     | 11.65 | 12.07 | 1.09 | 1.3  | -0.42 | 4.53E-04 | 4.46E-03 | (B) TP53 wild in GC |
| DOCK8   | 9p24.3     | 8.99  | 9.41  | 1.24 | 1.15 | -0.42 | 4.56E-04 | 4.48E-03 | (B) TP53 wild in GC |
| ARRDC4  | 15q26.2    | 9.02  | 9.37  | 0.97 | 1.04 | -0.35 | 4.61E-04 | 4.51E-03 | (B) TP53 wild in GC |
| GBP4    | 1p22.2     | 10.16 | 10.69 | 1.43 | 1.58 | -0.52 | 4.62E-04 | 4.52E-03 | (B) TP53 wild in GC |
| RCSD1   | 1q24.2     | 7.66  | 8.06  | 1.1  | 1.22 | -0.4  | 4.62E-04 | 4.52E-03 | (B) TP53 wild in GC |
| DCUN1D4 | 4q12       | 8.91  | 9.09  | 0.52 | 0.53 | -0.18 | 4.63E-04 | 4.52E-03 | (B) TP53 wild in GC |
| SCML4   | 6q21       | 5.19  | 5.77  | 1.65 | 1.67 | -0.58 | 4.64E-04 | 4.52E-03 | (B) TP53 wild in GC |
| GPR65   | 14q31.3    | 5.73  | 6.16  | 1.15 | 1.31 | -0.43 | 4.64E-04 | 4.52E-03 | (B) TP53 wild in GC |
| PIK3R3  | 1p34.1     | 9.12  | 9.37  | 0.68 | 0.82 | -0.26 | 4.66E-04 | 4.53E-03 | (B) TP53 wild in GC |
| LILRB1  | 19q13.42   | 6.4   | 6.86  | 1.28 | 1.37 | -0.46 | 4.67E-04 | 4.55E-03 | (B) TP53 wild in GC |
| RCL1    | 9p24.1     | 8.21  | 8.45  | 0.6  | 0.79 | -0.24 | 4.68E-04 | 4.55E-03 | (B) TP53 wild in GC |
| AFF1    | 4q21.3-q22 | 10.75 | 10.96 | 0.58 | 0.61 | -0.21 | 4.70E-04 | 4.56E-03 | (B) TP53 wild in GC |
| LURAPIL | 9p23       | 8.48  | 8.83  | 1.08 | 0.94 | -0.36 | 4.71E-04 | 4.56E-03 | (B) TP53 wild in GC |

|          |            |       |       |      |      |       |          |          |                     |
|----------|------------|-------|-------|------|------|-------|----------|----------|---------------------|
| SELPLG   | 12q24.11   | 8.56  | 8.94  | 1.1  | 1.1  | -0.39 | 4.72E-04 | 4.56E-03 | (B) TP53 wild in GC |
| CENPC    | 4q13.2     | 7.78  | 7.98  | 0.58 | 0.57 | -0.2  | 4.74E-04 | 4.58E-03 | (B) TP53 wild in GC |
| CYB5D1   | 17p13.1    | 8.36  | 8.55  | 0.54 | 0.56 | -0.19 | 4.75E-04 | 4.58E-03 | (B) TP53 wild in GC |
| IGIP     | 5q31.3     | 7.69  | 7.93  | 0.65 | 0.76 | -0.24 | 4.75E-04 | 4.58E-03 | (B) TP53 wild in GC |
| LMF1     | 16p13.3    | 7.43  | 7.76  | 0.98 | 0.87 | -0.33 | 4.77E-04 | 4.60E-03 | (B) TP53 wild in GC |
| CD48     | 1q23.3     | 7.69  | 8.19  | 1.36 | 1.54 | -0.5  | 4.80E-04 | 4.62E-03 | (B) TP53 wild in GC |
| ABRAXAS1 | 4q21.23    | 7.35  | 7.59  | 0.7  | 0.67 | -0.24 | 4.86E-04 | 4.66E-03 | (B) TP53 wild in GC |
| PTGER2   | 14q22.1    | 7.19  | 7.7   | 1.46 | 1.5  | -0.52 | 4.91E-04 | 4.70E-03 | (B) TP53 wild in GC |
| ZNF831   | 20q13.32   | 4.88  | 5.51  | 1.81 | 1.76 | -0.62 | 5.00E-04 | 4.77E-03 | (B) TP53 wild in GC |
| ANK1     | 8p11.21    | 5.9   | 6.55  | 1.7  | 2.06 | -0.65 | 5.01E-04 | 4.77E-03 | (B) TP53 wild in GC |
| TRAPPC10 | 21q22.3    | 10.34 | 10.5  | 0.48 | 0.43 | -0.16 | 5.08E-04 | 4.82E-03 | (B) TP53 wild in GC |
| PDCD1LG2 | 9p24.1     | 5.53  | 6.01  | 1.31 | 1.44 | -0.48 | 5.10E-04 | 4.84E-03 | (B) TP53 wild in GC |
| PRKCB    | 16p12.2-p1 | 7.89  | 8.46  | 1.52 | 1.78 | -0.57 | 5.14E-04 | 4.87E-03 | (B) TP53 wild in GC |
| MTREX    | 5q11.2     | 10.14 | 10.3  | 0.45 | 0.46 | -0.16 | 5.15E-04 | 4.87E-03 | (B) TP53 wild in GC |
| NKG7     | 19q13.41   | 7.03  | 7.59  | 1.59 | 1.65 | -0.56 | 5.19E-04 | 4.91E-03 | (B) TP53 wild in GC |
| CFH      | 1q31.3     | 9.92  | 10.36 | 1.17 | 1.4  | -0.44 | 5.21E-04 | 4.92E-03 | (B) TP53 wild in GC |

|           |         |       |       |      |      |       |          |          |                     |
|-----------|---------|-------|-------|------|------|-------|----------|----------|---------------------|
| PITPNC1   | 17q24.2 | 7.93  | 8.22  | 0.85 | 0.8  | -0.29 | 5.23E-04 | 4.92E-03 | (B) TP53 wild in GC |
| RORA      | 15q22.2 | 7.89  | 8.26  | 1.03 | 1.12 | -0.37 | 5.26E-04 | 4.95E-03 | (B) TP53 wild in GC |
| SACMIL    | 3p21.31 | 9.7   | 9.85  | 0.42 | 0.42 | -0.15 | 5.38E-04 | 5.05E-03 | (B) TP53 wild in GC |
| GNPNAT1   | 14q22.1 | 10.35 | 10.59 | 0.67 | 0.69 | -0.23 | 5.39E-04 | 5.05E-03 | (B) TP53 wild in GC |
| ATP11C    | Xq27.1  | 8.65  | 8.91  | 0.76 | 0.7  | -0.25 | 5.41E-04 | 5.06E-03 | (B) TP53 wild in GC |
| TP53INP1  | 8q22.1  | 9.17  | 9.47  | 0.85 | 0.88 | -0.3  | 5.42E-04 | 5.06E-03 | (B) TP53 wild in GC |
| RPS6      | 9p22.1  | 14.02 | 14.26 | 0.72 | 0.68 | -0.24 | 5.43E-04 | 5.06E-03 | (B) TP53 wild in GC |
| RGS18     | 1q31.2  | 4.84  | 5.29  | 1.2  | 1.46 | -0.45 | 5.53E-04 | 5.14E-03 | (B) TP53 wild in GC |
| EPB41L4A- | 5q22.1  | 7.42  | 7.7   | 0.83 | 0.78 | -0.28 | 5.61E-04 | 5.19E-03 | (B) TP53 wild in GC |
| PRKAR2B   | 7q22.3  | 7.3   | 7.8   | 1.3  | 1.62 | -0.5  | 5.63E-04 | 5.21E-03 | (B) TP53 wild in GC |
| IL2RB     | 22q12.3 | 8.8   | 9.23  | 1.25 | 1.26 | -0.43 | 5.64E-04 | 5.21E-03 | (B) TP53 wild in GC |
| LOC15476  | 17q35   | 4.57  | 4.96  | 1.19 | 1.07 | -0.39 | 5.65E-04 | 5.22E-03 | (B) TP53 wild in GC |
| GIMAP2    | 7q36.1  | 7.11  | 7.45  | 1    | 0.95 | -0.34 | 5.73E-04 | 5.27E-03 | (B) TP53 wild in GC |
| RIPOR2    | 6p22.3  | 6.48  | 7.01  | 1.46 | 1.66 | -0.53 | 5.76E-04 | 5.29E-03 | (B) TP53 wild in GC |
| MKNK2     | 19p13.3 | 11.46 | 11.67 | 0.62 | 0.58 | -0.21 | 5.85E-04 | 5.35E-03 | (B) TP53 wild in GC |
| TMC8      | 17q25.3 | 8.28  | 8.66  | 1.07 | 1.18 | -0.38 | 5.87E-04 | 5.36E-03 | (B) TP53 wild in GC |



|          |            |       |       |      |      |       |          |          |                     |
|----------|------------|-------|-------|------|------|-------|----------|----------|---------------------|
| RNF14    | 5q31.3     | 9.32  | 9.46  | 0.39 | 0.43 | -0.14 | 5.89E-04 | 5.37E-03 | (B) TP53 wild in GC |
| CYBB Xp  | 21.1-p11   | 9.68  | 10.13 | 1.3  | 1.33 | -0.45 | 5.92E-04 | 5.38E-03 | (B) TP53 wild in GC |
| ATP8B4   | 15q21.2    | 5.43  | 5.84  | 1.14 | 1.24 | -0.41 | 5.93E-04 | 5.39E-03 | (B) TP53 wild in GC |
| ZBTB38   | 3q23       | 10.96 | 11.17 | 0.58 | 0.69 | -0.22 | 6.01E-04 | 5.45E-03 | (B) TP53 wild in GC |
| PXK 3p   | 14.3       | 7.86  | 8.1   | 0.71 | 0.65 | -0.24 | 6.10E-04 | 5.51E-03 | (B) TP53 wild in GC |
| ACTR8    | 3p21.1     | 8.4   | 8.54  | 0.45 | 0.39 | -0.15 | 6.14E-04 | 5.54E-03 | (B) TP53 wild in GC |
| 5-Mar    | 10q23.32-q | 9.48  | 9.63  | 0.42 | 0.45 | -0.15 | 6.15E-04 | 5.54E-03 | (B) TP53 wild in GC |
| FYB1     | 5p13.1     | 9.2   | 9.62  | 1.16 | 1.29 | -0.42 | 6.16E-04 | 5.54E-03 | (B) TP53 wild in GC |
| GABPA    | 21q21.3    | 9.37  | 9.53  | 0.44 | 0.46 | -0.15 | 6.19E-04 | 5.56E-03 | (B) TP53 wild in GC |
| MAPK1IP1 | 14q22.3    | 11.44 | 11.57 | 0.4  | 0.34 | -0.13 | 6.19E-04 | 5.56E-03 | (B) TP53 wild in GC |
| UTP15    | 5q13.2     | 8.03  | 8.2   | 0.47 | 0.47 | -0.16 | 6.20E-04 | 5.56E-03 | (B) TP53 wild in GC |
| TLR7     | Xp22.2     | 5.82  | 6.37  | 1.57 | 1.66 | -0.55 | 6.22E-04 | 5.57E-03 | (B) TP53 wild in GC |
| BBC3     | 19q13.32   | 7.93  | 8.26  | 0.92 | 0.99 | -0.33 | 6.25E-04 | 5.59E-03 | (B) TP53 wild in GC |
| RASAL3   | 19p13.12   | 7.45  | 7.86  | 1.17 | 1.26 | -0.41 | 6.25E-04 | 5.59E-03 | (B) TP53 wild in GC |
| CD4      | 12p13.31   | 9.73  | 10.12 | 1.14 | 1.16 | -0.39 | 6.26E-04 | 5.59E-03 | (B) TP53 wild in GC |
| MNT      | 17p13.3    | 9.71  | 9.87  | 0.46 | 0.49 | -0.16 | 6.28E-04 | 5.60E-03 | (B) TP53 wild in GC |

|        |            |       |       |      |      |       |          |          |                     |
|--------|------------|-------|-------|------|------|-------|----------|----------|---------------------|
| HMG20A | 15q24.3    | 9.38  | 9.51  | 0.39 | 0.38 | -0.13 | 6.33E-04 | 5.63E-03 | (B) TP53 wild in GC |
| COX10  | 17p12      | 8.56  | 8.72  | 0.49 | 0.47 | -0.16 | 6.33E-04 | 5.63E-03 | (B) TP53 wild in GC |
| MEIS1  | 2p14       | 8.02  | 8.46  | 1.21 | 1.4  | -0.44 | 6.34E-04 | 5.63E-03 | (B) TP53 wild in GC |
| PDE12  | 3p14.3     | 9.73  | 9.9   | 0.53 | 0.44 | -0.17 | 6.37E-04 | 5.65E-03 | (B) TP53 wild in GC |
| RNASE6 | 14q11.2    | 7.75  | 8.17  | 1.15 | 1.36 | -0.42 | 6.44E-04 | 5.70E-03 | (B) TP53 wild in GC |
| RPL10A | 6p21.31    | 12.72 | 12.92 | 0.62 | 0.58 | -0.21 | 6.45E-04 | 5.70E-03 | (B) TP53 wild in GC |
| COX15  | 10q24.2    | 10.04 | 10.19 | 0.43 | 0.46 | -0.15 | 6.47E-04 | 5.71E-03 | (B) TP53 wild in GC |
| SMAD2  | 18q21.1    | 10.38 | 10.55 | 0.49 | 0.46 | -0.16 | 6.47E-04 | 5.71E-03 | (B) TP53 wild in GC |
| ACAD11 | 3q22.1     | 7.46  | 7.71  | 0.69 | 0.77 | -0.25 | 6.48E-04 | 5.71E-03 | (B) TP53 wild in GC |
| GLIPR2 | 9p13.3     | 8.04  | 8.4   | 0.98 | 1.13 | -0.36 | 6.50E-04 | 5.72E-03 | (B) TP53 wild in GC |
| TBC1D1 | 4p14       | 10.35 | 10.57 | 0.6  | 0.7  | -0.22 | 6.53E-04 | 5.74E-03 | (B) TP53 wild in GC |
| GLIPR1 | 12q21.2    | 9.03  | 9.42  | 0.98 | 1.32 | -0.39 | 6.54E-04 | 5.74E-03 | (B) TP53 wild in GC |
| ESR1   | 6q25.1-q25 | 4.25  | 4.75  | 1.38 | 1.58 | -0.5  | 6.56E-04 | 5.76E-03 | (B) TP53 wild in GC |
| DPYSL2 | 8p21.2     | 10.89 | 11.18 | 0.84 | 0.85 | -0.29 | 6.58E-04 | 5.77E-03 | (B) TP53 wild in GC |
| MCUB   | 4q25       | 7.77  | 8.07  | 0.92 | 0.8  | -0.3  | 6.59E-04 | 5.78E-03 | (B) TP53 wild in GC |
| THAP6  | 4q21.1     | 8.07  | 8.21  | 0.4  | 0.43 | -0.14 | 6.60E-04 | 5.78E-03 | (B) TP53 wild in GC |

|          |          |       |       |      |      |       |          |          |                     |
|----------|----------|-------|-------|------|------|-------|----------|----------|---------------------|
| HERC1    | 15q22.31 | 10.17 | 10.39 | 0.61 | 0.65 | -0.21 | 6.63E-04 | 5.81E-03 | (B) TP53 wild in GC |
| PIK3R6   | 17p13.1  | 4.99  | 5.39  | 1.16 | 1.19 | -0.4  | 6.66E-04 | 5.83E-03 | (B) TP53 wild in GC |
| MRPL54   | 19p13.3  | 8.27  | 8.49  | 0.63 | 0.62 | -0.21 | 6.71E-04 | 5.86E-03 | (B) TP53 wild in GC |
| PARVA    | 11p15.3  | 10.57 | 10.83 | 0.68 | 0.84 | -0.26 | 6.73E-04 | 5.87E-03 | (B) TP53 wild in GC |
| UBE2D3   | 4q24     | 11.73 | 11.86 | 0.42 | 0.38 | -0.14 | 6.76E-04 | 5.89E-03 | (B) TP53 wild in GC |
| SIRPG    | 20p13    | 5.51  | 6.06  | 1.63 | 1.62 | -0.55 | 6.77E-04 | 5.89E-03 | (B) TP53 wild in GC |
| MEF2A    | 15q26.3  | 10.37 | 10.59 | 0.58 | 0.71 | -0.22 | 6.81E-04 | 5.92E-03 | (B) TP53 wild in GC |
| FAM114A2 | 5q33.2   | 8.27  | 8.42  | 0.46 | 0.46 | -0.16 | 6.86E-04 | 5.93E-03 | (B) TP53 wild in GC |
| MFAP3    | 5q33.2   | 9.56  | 9.72  | 0.44 | 0.46 | -0.15 | 6.87E-04 | 5.94E-03 | (B) TP53 wild in GC |
| CMKLR1   | 12q23.3  | 7.72  | 8.13  | 1.14 | 1.31 | -0.41 | 6.97E-04 | 6.00E-03 | (B) TP53 wild in GC |
| PIIP5K2  | 5q21.1   | 9.63  | 9.84  | 0.61 | 0.61 | -0.21 | 7.01E-04 | 6.03E-03 | (B) TP53 wild in GC |
| TP53     | 17p13.1  | 10.39 | 10.76 | 1.13 | 1.01 | -0.37 | 7.04E-04 | 6.05E-03 | (B) TP53 wild in GC |
| CREBL2   | 12p13.1  | 9.95  | 10.14 | 0.54 | 0.59 | -0.19 | 7.05E-04 | 6.05E-03 | (B) TP53 wild in GC |
| IL15     | 4q31.21  | 6.04  | 6.4   | 1.13 | 1.01 | -0.37 | 7.13E-04 | 6.11E-03 | (B) TP53 wild in GC |
| CCND2    | 12p13.32 | 10.63 | 11.15 | 1.53 | 1.54 | -0.52 | 7.18E-04 | 6.13E-03 | (B) TP53 wild in GC |
| CDKN1A   | 6p21.2   | 10.92 | 11.22 | 0.91 | 0.91 | -0.31 | 7.23E-04 | 6.17E-03 | (B) TP53 wild in GC |

|          |          |       |       |      |      |       |          |          |                     |
|----------|----------|-------|-------|------|------|-------|----------|----------|---------------------|
| ARIH2    | 3p21.31  | 10.04 | 10.17 | 0.39 | 0.36 | -0.13 | 7.25E-04 | 6.17E-03 | (B) TP53 wild in GC |
| RAD17    | 5q13.2   | 8.77  | 8.92  | 0.44 | 0.4  | -0.14 | 7.25E-04 | 6.17E-03 | (B) TP53 wild in GC |
| HLA-DPB1 | 6p21.32  | 11.01 | 11.48 | 1.36 | 1.44 | -0.47 | 7.30E-04 | 6.21E-03 | (B) TP53 wild in GC |
| ZNF836   | 19q13.41 | 6.54  | 6.78  | 0.73 | 0.66 | -0.24 | 7.33E-04 | 6.22E-03 | (B) TP53 wild in GC |
| TRAPPC11 | 4q35.1   | 9.53  | 9.69  | 0.46 | 0.47 | -0.16 | 7.39E-04 | 6.26E-03 | (B) TP53 wild in GC |
| TLR4     | 9q33.1   | 8.04  | 8.43  | 1.16 | 1.14 | -0.39 | 7.46E-04 | 6.31E-03 | (B) TP53 wild in GC |
| ATXN7    | 3p14.1   | 9.43  | 9.59  | 0.49 | 0.47 | -0.16 | 7.51E-04 | 6.34E-03 | (B) TP53 wild in GC |
| STAB1    | 3p21.1   | 9.78  | 10.12 | 0.95 | 1.07 | -0.34 | 7.53E-04 | 6.34E-03 | (B) TP53 wild in GC |
| RSL24D1  | 15q21.3  | 10.31 | 10.49 | 0.55 | 0.5  | -0.18 | 7.53E-04 | 6.35E-03 | (B) TP53 wild in GC |
| ZZEF1    | 17p13.2  | 10.66 | 10.86 | 0.6  | 0.6  | -0.2  | 7.59E-04 | 6.39E-03 | (B) TP53 wild in GC |
| RAP1B    | 12q15    | 10.98 | 11.18 | 0.55 | 0.66 | -0.2  | 7.63E-04 | 6.42E-03 | (B) TP53 wild in GC |
| ZNF616   | 19q13.41 | 7     | 7.21  | 0.65 | 0.62 | -0.21 | 7.68E-04 | 6.45E-03 | (B) TP53 wild in GC |
| FNIP1    | 5q31.1   | 9.41  | 9.58  | 0.52 | 0.52 | -0.17 | 7.71E-04 | 6.47E-03 | (B) TP53 wild in GC |
| C2CD2    | 21q22.3  | 9.24  | 9.44  | 0.57 | 0.61 | -0.2  | 7.77E-04 | 6.51E-03 | (B) TP53 wild in GC |
| N6AMT1   | 21q21.3  | 7.17  | 7.35  | 0.54 | 0.53 | -0.18 | 7.90E-04 | 6.60E-03 | (B) TP53 wild in GC |
| PIGY     | 4q22.1   | 10.11 | 10.25 | 0.44 | 0.39 | -0.14 | 7.95E-04 | 6.62E-03 | (B) TP53 wild in GC |

|         |          |       |       |      |      |       |          |          |                     |
|---------|----------|-------|-------|------|------|-------|----------|----------|---------------------|
| LPAR6   | 13q14.2  | 8.24  | 8.56  | 0.93 | 0.98 | -0.32 | 8.04E-04 | 6.68E-03 | (B) TP53 wild in GC |
| C5ORF56 | 5q31.1   | 6.46  | 6.75  | 0.83 | 0.87 | -0.28 | 8.05E-04 | 6.68E-03 | (B) TP53 wild in GC |
| CSNK1G3 | 5q23.2   | 9.33  | 9.49  | 0.49 | 0.44 | -0.16 | 8.09E-04 | 6.71E-03 | (B) TP53 wild in GC |
| GBP1    | 1p22.2   | 9.95  | 10.36 | 1.21 | 1.27 | -0.41 | 8.15E-04 | 6.75E-03 | (B) TP53 wild in GC |
| KIF27   | 9q21.32  | 6.19  | 6.46  | 0.83 | 0.75 | -0.27 | 8.17E-04 | 6.76E-03 | (B) TP53 wild in GC |
| MYOF    | 10q23.33 | 11.48 | 11.82 | 0.96 | 1.1  | -0.34 | 8.36E-04 | 6.88E-03 | (B) TP53 wild in GC |
| CD53    | 1p13.3   | 9.16  | 9.59  | 1.25 | 1.34 | -0.43 | 8.37E-04 | 6.89E-03 | (B) TP53 wild in GC |
| RB1     | 13q14.2  | 10.83 | 11.05 | 0.74 | 0.54 | -0.22 | 8.48E-04 | 6.96E-03 | (B) TP53 wild in GC |
| TMEM106 | 17q21.31 | 7.1   | 7.4   | 0.98 | 0.81 | -0.3  | 8.48E-04 | 6.96E-03 | (B) TP53 wild in GC |
| FKBP15  | 9q32     | 9.77  | 9.92  | 0.46 | 0.41 | -0.15 | 8.52E-04 | 6.98E-03 | (B) TP53 wild in GC |
| GNAQ    | 9q21.2   | 10.84 | 11.04 | 0.63 | 0.54 | -0.2  | 8.53E-04 | 6.98E-03 | (B) TP53 wild in GC |
| RAPGEF6 | 5q31.1   | 8.38  | 8.63  | 0.73 | 0.77 | -0.25 | 8.54E-04 | 6.98E-03 | (B) TP53 wild in GC |
| SAMSN1  | 21q11.2  | 7.46  | 7.88  | 1.22 | 1.27 | -0.41 | 8.62E-04 | 7.04E-03 | (B) TP53 wild in GC |
| ITPR1   | 3p26.1   | 8.54  | 8.93  | 1.12 | 1.27 | -0.39 | 8.63E-04 | 7.05E-03 | (B) TP53 wild in GC |
| WARS    | 14q32.2  | 12.02 | 12.39 | 0.96 | 1.29 | -0.37 | 8.69E-04 | 7.07E-03 | (B) TP53 wild in GC |
| DCAF16  | 4p15.31  | 9.49  | 9.66  | 0.52 | 0.49 | -0.17 | 8.79E-04 | 7.14E-03 | (B) TP53 wild in GC |

|         |         |       |       |      |      |       |          |          |                     |
|---------|---------|-------|-------|------|------|-------|----------|----------|---------------------|
| PRMT9   | 4q31.23 | 7.12  | 7.29  | 0.54 | 0.47 | -0.17 | 8.84E-04 | 7.17E-03 | (B) TP53 wild in GC |
| RAB27A  | 15q21.3 | 9.28  | 9.54  | 0.75 | 0.79 | -0.25 | 8.86E-04 | 7.18E-03 | (B) TP53 wild in GC |
| CD28    | 2q33.2  | 5.65  | 6.11  | 1.37 | 1.46 | -0.47 | 8.89E-04 | 7.20E-03 | (B) TP53 wild in GC |
| RPL29   | 3p21.2  | 13.18 | 13.42 | 0.77 | 0.72 | -0.25 | 9.01E-04 | 7.29E-03 | (B) TP53 wild in GC |
| AZI2    | 3p24.1  | 9.44  | 9.57  | 0.38 | 0.41 | -0.13 | 9.01E-04 | 7.29E-03 | (B) TP53 wild in GC |
| MANBA   | 4q24    | 9.13  | 9.33  | 0.59 | 0.57 | -0.19 | 9.17E-04 | 7.39E-03 | (B) TP53 wild in GC |
| FAT1    | 4q35.2  | 12.59 | 12.89 | 0.89 | 0.88 | -0.29 | 9.25E-04 | 7.44E-03 | (B) TP53 wild in GC |
| TSPAN12 | 7q31.31 | 8.25  | 8.62  | 1.16 | 1.08 | -0.37 | 9.31E-04 | 7.47E-03 | (B) TP53 wild in GC |
| AKNA    | 9q32    | 10.14 | 10.42 | 0.81 | 0.9  | -0.28 | 9.32E-04 | 7.48E-03 | (B) TP53 wild in GC |
| SLC9A9  | 3q24    | 6.19  | 6.64  | 1.26 | 1.48 | -0.45 | 9.35E-04 | 7.50E-03 | (B) TP53 wild in GC |
| SEC24B  | 4q25    | 10.19 | 10.33 | 0.43 | 0.41 | -0.14 | 9.47E-04 | 7.57E-03 | (B) TP53 wild in GC |
| CSF1R   | 5q32    | 9.44  | 9.87  | 1.29 | 1.33 | -0.43 | 9.50E-04 | 7.58E-03 | (B) TP53 wild in GC |
| GRIN3A  | 9q31.1  | 4.24  | 4.6   | 1.14 | 1.01 | -0.36 | 9.50E-04 | 7.58E-03 | (B) TP53 wild in GC |
| SLC1A3  | 5p13.2  | 7.06  | 7.56  | 1.5  | 1.51 | -0.5  | 9.59E-04 | 7.64E-03 | (B) TP53 wild in GC |
| PIK3CD  | 1p36.22 | 8.27  | 8.63  | 1.04 | 1.16 | -0.36 | 9.63E-04 | 7.65E-03 | (B) TP53 wild in GC |
| MTR     | 1q43    | 9.79  | 9.99  | 0.57 | 0.61 | -0.19 | 9.63E-04 | 7.65E-03 | (B) TP53 wild in GC |

|          |              |       |       |      |      |       |          |          |                     |
|----------|--------------|-------|-------|------|------|-------|----------|----------|---------------------|
| BNIP3L   | 8p21.2       | 10.49 | 10.7  | 0.66 | 0.59 | -0.21 | 9.69E-04 | 7.69E-03 | (B) TP53 wild in GC |
| ARHGAP30 | 1q23.3       | 8.62  | 8.97  | 1.02 | 1.11 | -0.35 | 9.72E-04 | 7.69E-03 | (B) TP53 wild in GC |
| EIF4E    | 4q23         | 8.44  | 8.62  | 0.55 | 0.56 | -0.18 | 9.75E-04 | 7.71E-03 | (B) TP53 wild in GC |
| WDR7     | 18q21.31     | 8.77  | 8.99  | 0.68 | 0.62 | -0.22 | 9.79E-04 | 7.73E-03 | (B) TP53 wild in GC |
| RNF122   | 8p12         | 7.04  | 7.32  | 0.83 | 0.89 | -0.28 | 9.87E-04 | 7.76E-03 | (B) TP53 wild in GC |
| ZBTB7C   | 18q21.1      | 7.43  | 8.16  | 2.21 | 2.23 | -0.73 | 9.87E-04 | 7.76E-03 | (B) TP53 wild in GC |
| SLC12A2  | 5q23.3       | 11.6  | 12.02 | 1.26 | 1.29 | -0.42 | 1.00E-03 | 7.86E-03 | (B) TP53 wild in GC |
| TOM1L2   | 17p11.2      | 9.98  | 10.23 | 0.77 | 0.71 | -0.25 | 1.00E-03 | 7.86E-03 | (B) TP53 wild in GC |
| LOC      | 1001299q33.3 | 10.84 | 11.07 | 0.74 | 0.65 | -0.23 | 1.01E-03 | 7.88E-03 | (B) TP53 wild in GC |
| TENT5A   | 6q14.1       | 10.16 | 10.47 | 0.98 | 0.87 | -0.31 | 1.01E-03 | 7.89E-03 | (B) TP53 wild in GC |
| SAV1     | 14q22.1      | 9.33  | 9.52  | 0.57 | 0.6  | -0.19 | 1.02E-03 | 7.93E-03 | (B) TP53 wild in GC |
| POLH     | 6p21.1       | 9.09  | 9.3   | 0.65 | 0.6  | -0.21 | 1.02E-03 | 7.95E-03 | (B) TP53 wild in GC |
| ABR      | 17p13.3      | 11.47 | 11.64 | 0.52 | 0.53 | -0.17 | 1.04E-03 | 8.05E-03 | (B) TP53 wild in GC |
| C16ORF54 | 16p11.2      | 5.56  | 6.08  | 1.58 | 1.59 | -0.52 | 1.04E-03 | 8.08E-03 | (B) TP53 wild in GC |
| CD5      | 11q12.2      | 7.02  | 7.52  | 1.59 | 1.4  | -0.5  | 1.05E-03 | 8.08E-03 | (B) TP53 wild in GC |
| GCSAM    | 3q13.2       | 5.09  | 5.48  | 1.14 | 1.22 | -0.39 | 1.05E-03 | 8.08E-03 | (B) TP53 wild in GC |

|        |            |       |       |      |      |       |          |          |                     |
|--------|------------|-------|-------|------|------|-------|----------|----------|---------------------|
| WBP1L  | 10q24.32   | 10.07 | 10.25 | 0.54 | 0.59 | -0.18 | 1.05E-03 | 8.11E-03 | (B) TP53 wild in GC |
| FLI1   | 11q24.3    | 7.95  | 8.28  | 0.94 | 1.11 | -0.33 | 1.06E-03 | 8.14E-03 | (B) TP53 wild in GC |
| PPM1L  | 3q25.33-q2 | 7.06  | 7.41  | 1.01 | 1.15 | -0.35 | 1.07E-03 | 8.20E-03 | (B) TP53 wild in GC |
| ZNF589 | 3p21.31    | 7.64  | 7.85  | 0.65 | 0.66 | -0.21 | 1.07E-03 | 8.20E-03 | (B) TP53 wild in GC |
| CLEC4A | 12p13.31   | 5.14  | 5.52  | 1.14 | 1.22 | -0.38 | 1.07E-03 | 8.20E-03 | (B) TP53 wild in GC |
| JADE1  | 4q28.2     | 9.65  | 9.88  | 0.75 | 0.67 | -0.24 | 1.07E-03 | 8.22E-03 | (B) TP53 wild in GC |
| NISCH  | 3p21.1     | 10.35 | 10.53 | 0.55 | 0.6  | -0.19 | 1.07E-03 | 8.24E-03 | (B) TP53 wild in GC |
| RAB8B  | 15q22.2    | 9.21  | 9.42  | 0.62 | 0.69 | -0.21 | 1.08E-03 | 8.26E-03 | (B) TP53 wild in GC |
| PIGB   | 15q21.3    | 7.81  | 7.97  | 0.54 | 0.44 | -0.16 | 1.08E-03 | 8.26E-03 | (B) TP53 wild in GC |
| LRMP   | 12p12.1    | 5.8   | 6.37  | 1.77 | 1.73 | -0.57 | 1.08E-03 | 8.29E-03 | (B) TP53 wild in GC |
| ATP2B4 | 1q32.1     | 11.39 | 11.75 | 0.99 | 1.21 | -0.36 | 1.09E-03 | 8.32E-03 | (B) TP53 wild in GC |
| TRIM23 | 5q12.3     | 7.1   | 7.29  | 0.57 | 0.61 | -0.19 | 1.11E-03 | 8.43E-03 | (B) TP53 wild in GC |
| CD33   | 19q13.41   | 4.91  | 5.33  | 1.3  | 1.29 | -0.42 | 1.11E-03 | 8.43E-03 | (B) TP53 wild in GC |
| MOB3A  | 19p13.3    | 10.32 | 10.52 | 0.64 | 0.62 | -0.21 | 1.11E-03 | 8.44E-03 | (B) TP53 wild in GC |
| IL18BP | 11q13.4    | 8.72  | 9.03  | 0.94 | 0.99 | -0.31 | 1.13E-03 | 8.53E-03 | (B) TP53 wild in GC |
| PSIP1  | 9p22.3     | 9.99  | 10.21 | 0.71 | 0.62 | -0.22 | 1.13E-03 | 8.56E-03 | (B) TP53 wild in GC |



|          |            |       |       |      |      |       |          |          |                     |
|----------|------------|-------|-------|------|------|-------|----------|----------|---------------------|
| WAS      | Xp11.23    | 7.58  | 7.98  | 1.27 | 1.21 | -0.4  | 1.14E-03 | 8.57E-03 | (B) TP53 wild in GC |
| RAP1GDS1 | 4q23       | 9.16  | 9.31  | 0.5  | 0.44 | -0.15 | 1.14E-03 | 8.57E-03 | (B) TP53 wild in GC |
| TBC1D2B  | 15q24.3-q2 | 10.17 | 10.37 | 0.6  | 0.63 | -0.2  | 1.16E-03 | 8.67E-03 | (B) TP53 wild in GC |
| CD74     | 5q33.1     | 15.21 | 15.64 | 1.32 | 1.3  | -0.43 | 1.16E-03 | 8.67E-03 | (B) TP53 wild in GC |
| KAT2B    | 3p24.3     | 8.72  | 8.99  | 0.81 | 0.9  | -0.28 | 1.16E-03 | 8.67E-03 | (B) TP53 wild in GC |
| LANCL1   | 2q34       | 10.29 | 10.53 | 0.72 | 0.78 | -0.24 | 1.17E-03 | 8.73E-03 | (B) TP53 wild in GC |
| DRAM1    | 12q23.2    | 9.28  | 9.55  | 0.86 | 0.86 | -0.28 | 1.17E-03 | 8.73E-03 | (B) TP53 wild in GC |
| GIMAP1   | 7q36.1     | 5.92  | 6.3   | 1.08 | 1.26 | -0.38 | 1.17E-03 | 8.73E-03 | (B) TP53 wild in GC |
| GNA13    | 17q24.1    | 11.29 | 11.45 | 0.5  | 0.43 | -0.15 | 1.18E-03 | 8.81E-03 | (B) TP53 wild in GC |
| CCNI     | 4q21.1     | 11.72 | 11.89 | 0.51 | 0.5  | -0.16 | 1.18E-03 | 8.83E-03 | (B) TP53 wild in GC |
| CCDC68   | 18q21.2    | 8.34  | 8.75  | 1.33 | 1.14 | -0.41 | 1.19E-03 | 8.85E-03 | (B) TP53 wild in GC |
| TRIB2    | 2p24.3     | 9.59  | 9.92  | 1.05 | 0.99 | -0.33 | 1.20E-03 | 8.91E-03 | (B) TP53 wild in GC |
| APOBEC3G | 22q13.1    | 7.6   | 8     | 1.24 | 1.27 | -0.41 | 1.25E-03 | 9.21E-03 | (B) TP53 wild in GC |
| DGKA     | 12q13.2    | 8.96  | 9.27  | 0.97 | 0.96 | -0.31 | 1.25E-03 | 9.21E-03 | (B) TP53 wild in GC |
| ZNF18    | 17p12      | 7     | 7.17  | 0.6  | 0.48 | -0.18 | 1.25E-03 | 9.23E-03 | (B) TP53 wild in GC |
| DIPK2A   | 3q24       | 9.14  | 9.35  | 0.69 | 0.57 | -0.21 | 1.25E-03 | 9.25E-03 | (B) TP53 wild in GC |

|          |          |       |       |      |      |       |          |          |                     |
|----------|----------|-------|-------|------|------|-------|----------|----------|---------------------|
| SLA      | 8q24.22  | 7.98  | 8.38  | 1.22 | 1.3  | -0.4  | 1.26E-03 | 9.27E-03 | (B) TP53 wild in GC |
| CAMTA2   | 17p13.2  | 10.14 | 10.3  | 0.47 | 0.48 | -0.15 | 1.26E-03 | 9.28E-03 | (B) TP53 wild in GC |
| ATG7     | 3p25.3   | 9.17  | 9.29  | 0.4  | 0.35 | -0.12 | 1.27E-03 | 9.31E-03 | (B) TP53 wild in GC |
| SARAF    | 8p12     | 11.95 | 12.12 | 0.55 | 0.49 | -0.17 | 1.27E-03 | 9.32E-03 | (B) TP53 wild in GC |
| CHD9     | 16q12.2  | 10.04 | 10.24 | 0.6  | 0.64 | -0.2  | 1.29E-03 | 9.43E-03 | (B) TP53 wild in GC |
| SLC4A4   | 4q13.3   | 8.38  | 9.12  | 2.33 | 2.23 | -0.74 | 1.29E-03 | 9.46E-03 | (B) TP53 wild in GC |
| TLR1     | 4p14     | 6.32  | 6.76  | 1.31 | 1.46 | -0.44 | 1.29E-03 | 9.46E-03 | (B) TP53 wild in GC |
| CASP7    | 10q25.3  | 9.84  | 10.06 | 0.69 | 0.72 | -0.23 | 1.30E-03 | 9.50E-03 | (B) TP53 wild in GC |
| TBC1D10C | 11q13.2  | 6.12  | 6.6   | 1.45 | 1.52 | -0.48 | 1.31E-03 | 9.54E-03 | (B) TP53 wild in GC |
| NEK1     | 4q33     | 7.81  | 8     | 0.58 | 0.62 | -0.19 | 1.31E-03 | 9.54E-03 | (B) TP53 wild in GC |
| TNKS2    | 10q23.32 | 10.44 | 10.59 | 0.46 | 0.49 | -0.15 | 1.32E-03 | 9.62E-03 | (B) TP53 wild in GC |
| ZNF491   | 19p13.2  | 3.63  | 3.97  | 1.03 | 1.08 | -0.34 | 1.33E-03 | 9.65E-03 | (B) TP53 wild in GC |
| SASH3    | Xq26.1   | 8.01  | 8.43  | 1.29 | 1.37 | -0.43 | 1.33E-03 | 9.65E-03 | (B) TP53 wild in GC |
| CD37     | 19q13.33 | 8.68  | 9.15  | 1.43 | 1.51 | -0.47 | 1.34E-03 | 9.69E-03 | (B) TP53 wild in GC |
| TAMM41   | 3p25.2   | 7.02  | 7.18  | 0.51 | 0.48 | -0.16 | 1.35E-03 | 9.75E-03 | (B) TP53 wild in GC |
| TMEM268  | 9q32     | 8.48  | 8.65  | 0.54 | 0.54 | -0.17 | 1.35E-03 | 9.75E-03 | (B) TP53 wild in GC |

|         |          |       |       |      |      |       |          |          |                     |
|---------|----------|-------|-------|------|------|-------|----------|----------|---------------------|
| SCO1    | 17p13.1  | 8.66  | 8.84  | 0.55 | 0.53 | -0.17 | 1.36E-03 | 9.82E-03 | (B) TP53 wild in GC |
| CRYZL1  | 21q22.11 | 7.69  | 7.85  | 0.51 | 0.54 | -0.17 | 1.36E-03 | 9.85E-03 | (B) TP53 wild in GC |
| MYO1G   | 7p13     | 7.4   | 7.79  | 1.18 | 1.24 | -0.39 | 1.37E-03 | 9.91E-03 | (B) TP53 wild in GC |
| PLCB2   | 15q15.1  | 7.74  | 8.09  | 1.12 | 1.06 | -0.35 | 1.38E-03 | 9.91E-03 | (B) TP53 wild in GC |
| ASB8    | 12q13.11 | 9.05  | 9.17  | 0.36 | 0.39 | -0.12 | 1.38E-03 | 9.91E-03 | (B) TP53 wild in GC |
| CPED1   | 7q31.31  | 7.97  | 8.52  | 1.65 | 1.84 | -0.55 | 1.38E-03 | 9.91E-03 | (B) TP53 wild in GC |
| PIP5K1C | 19p13.3  | 10.75 | 10.95 | 0.57 | 0.67 | -0.2  | 1.38E-03 | 9.91E-03 | (B) TP53 wild in GC |
| NLGN3   | Xq13.1   | 5.09  | 5.51  | 1.25 | 1.37 | -0.42 | 1.39E-03 | 9.96E-03 | (B) TP53 wild in GC |
| BTN3A3  | 6p22.2   | 8.7   | 9.01  | 0.95 | 0.98 | -0.31 | 1.39E-03 | 9.97E-03 | (B) TP53 wild in GC |
| SLU7    | 5q33.3   | 9.76  | 9.92  | 0.54 | 0.42 | -0.16 | 1.39E-03 | 9.97E-03 | (B) TP53 wild in GC |
| NCBP3   | 17p13.2  | 9.1   | 9.25  | 0.46 | 0.45 | -0.15 | 1.40E-03 | 0.01     | (B) TP53 wild in GC |
| PIK3IP1 | 22q12.2  | 9.01  | 9.3   | 0.9  | 0.89 | -0.29 | 1.40E-03 | 0.01     | (B) TP53 wild in GC |
| EXOG    | 3p22.2   | 7.01  | 7.18  | 0.54 | 0.55 | -0.17 | 1.40E-03 | 0.0101   | (B) TP53 wild in GC |
| TRNT1   | 3p26.2   | 7.95  | 8.11  | 0.52 | 0.47 | -0.16 | 1.40E-03 | 0.0101   | (B) TP53 wild in GC |
| SP140   | 2q37.1   | 6.21  | 6.68  | 1.44 | 1.51 | -0.47 | 1.41E-03 | 0.0101   | (B) TP53 wild in GC |
| NSD1    | 5q35.3   | 11.03 | 11.19 | 0.51 | 0.49 | -0.16 | 1.41E-03 | 0.0101   | (B) TP53 wild in GC |

|        |           |       |       |      |      |       |          |        |                     |
|--------|-----------|-------|-------|------|------|-------|----------|--------|---------------------|
| ASPHD2 | 22q12.1   | 7.44  | 7.8   | 1.16 | 1.12 | -0.36 | 1.44E-03 | 0.0103 | (B) TP53 wild in GC |
| TLN1   | 9p13.3    | 13.25 | 13.5  | 0.72 | 0.86 | -0.25 | 1.44E-03 | 0.0103 | (B) TP53 wild in GC |
| ERCC8  | 5q12.1    | 7.02  | 7.17  | 0.49 | 0.46 | -0.15 | 1.45E-03 | 0.0103 | (B) TP53 wild in GC |
| MYO5C  | 15q21.2   | 10.06 | 10.35 | 0.95 | 0.87 | -0.29 | 1.45E-03 | 0.0103 | (B) TP53 wild in GC |
| IK     | 5q31.3    | 10.08 | 10.2  | 0.4  | 0.35 | -0.12 | 1.46E-03 | 0.0103 | (B) TP53 wild in GC |
| CGGBP1 | 3p11.1    | 10.84 | 10.97 | 0.43 | 0.4  | -0.13 | 1.47E-03 | 0.0104 | (B) TP53 wild in GC |
| PWWP3A | 19p13.3   | 9.17  | 9.33  | 0.51 | 0.46 | -0.16 | 1.47E-03 | 0.0105 | (B) TP53 wild in GC |
| SOS2   | 14q21.3   | 9.74  | 9.9   | 0.51 | 0.54 | -0.17 | 1.48E-03 | 0.0105 | (B) TP53 wild in GC |
| ADA2   | 22q11.1   | 9.89  | 10.31 | 1.31 | 1.31 | -0.42 | 1.49E-03 | 0.0105 | (B) TP53 wild in GC |
| TUT7   | 9q21.33   | 9.61  | 9.79  | 0.59 | 0.52 | -0.18 | 1.50E-03 | 0.0106 | (B) TP53 wild in GC |
| MOCS2  | 5q11.2    | 9.04  | 9.21  | 0.52 | 0.56 | -0.17 | 1.50E-03 | 0.0106 | (B) TP53 wild in GC |
| ARFIP1 | 4q31.3    | 9.73  | 9.88  | 0.5  | 0.38 | -0.14 | 1.51E-03 | 0.0106 | (B) TP53 wild in GC |
| ZEB2   | 2q22.3    | 9.25  | 9.6   | 0.98 | 1.22 | -0.35 | 1.51E-03 | 0.0106 | (B) TP53 wild in GC |
| FOXP1  | 3p13      | 10.88 | 11.1  | 0.71 | 0.62 | -0.21 | 1.51E-03 | 0.0106 | (B) TP53 wild in GC |
| ADM5   | 19q13.33  | 4.8   | 5.14  | 1.07 | 1.06 | -0.34 | 1.51E-03 | 0.0106 | (B) TP53 wild in GC |
| IKZF3  | 17q12-q21 | 6.37  | 6.95  | 1.77 | 1.92 | -0.58 | 1.52E-03 | 0.0107 | (B) TP53 wild in GC |

|         |          |       |       |      |      |       |          |        |                     |
|---------|----------|-------|-------|------|------|-------|----------|--------|---------------------|
| HADH    | 4q25     | 10.01 | 10.21 | 0.62 | 0.64 | -0.2  | 1.53E-03 | 0.0107 | (B) TP53 wild in GC |
| PDE10A  | 6q27     | 6.58  | 7.01  | 1.24 | 1.5  | -0.43 | 1.55E-03 | 0.0108 | (B) TP53 wild in GC |
| LAP3    | 4p15.32  | 10.98 | 11.21 | 0.68 | 0.78 | -0.23 | 1.55E-03 | 0.0108 | (B) TP53 wild in GC |
| AK3     | 9p24.1   | 10.77 | 10.97 | 0.65 | 0.58 | -0.2  | 1.56E-03 | 0.0109 | (B) TP53 wild in GC |
| SYNE1   | 6q25.2   | 9.26  | 9.71  | 1.31 | 1.55 | -0.45 | 1.57E-03 | 0.0109 | (B) TP53 wild in GC |
| FAM172A | 5q15     | 8.62  | 8.82  | 0.65 | 0.67 | -0.21 | 1.57E-03 | 0.0109 | (B) TP53 wild in GC |
| SLFN12  | 17q12    | 6.02  | 6.37  | 1.11 | 1.09 | -0.35 | 1.58E-03 | 0.011  | (B) TP53 wild in GC |
| TNFSF13 | 17p13.1  | 9.44  | 9.78  | 1.09 | 1.06 | -0.34 | 1.58E-03 | 0.011  | (B) TP53 wild in GC |
| MATR3   | 5q31.2   | 12.14 | 12.26 | 0.37 | 0.34 | -0.11 | 1.59E-03 | 0.011  | (B) TP53 wild in GC |
| LMBR1L  | 12q13.12 | 8.17  | 8.32  | 0.49 | 0.45 | -0.15 | 1.59E-03 | 0.011  | (B) TP53 wild in GC |
| FMNL1   | 17q21.31 | 9.08  | 9.41  | 1.03 | 1.04 | -0.33 | 1.60E-03 | 0.0111 | (B) TP53 wild in GC |
| SLC35B4 | 7q33     | 8.64  | 8.81  | 0.52 | 0.56 | -0.17 | 1.61E-03 | 0.0111 | (B) TP53 wild in GC |
| SUSD6   | 14q24.1  | 10.48 | 10.66 | 0.54 | 0.58 | -0.18 | 1.61E-03 | 0.0111 | (B) TP53 wild in GC |
| RTL6    | 22q13.31 | 9.95  | 10.14 | 0.66 | 0.55 | -0.19 | 1.62E-03 | 0.0111 | (B) TP53 wild in GC |
| CD200R1 | 3q13.2   | 4.14  | 4.59  | 1.36 | 1.53 | -0.45 | 1.62E-03 | 0.0111 | (B) TP53 wild in GC |
| CFP     | Xp11.23  | 4.84  | 5.25  | 1.23 | 1.38 | -0.41 | 1.66E-03 | 0.0113 | (B) TP53 wild in GC |

|          |          |       |       |      |      |       |          |        |                     |
|----------|----------|-------|-------|------|------|-------|----------|--------|---------------------|
| ITPKB    | 1q42.12  | 9.56  | 9.89  | 0.96 | 1.14 | -0.33 | 1.67E-03 | 0.0114 | (B) TP53 wild in GC |
| USP16    | 21q21.3  | 9.66  | 9.81  | 0.5  | 0.45 | -0.15 | 1.67E-03 | 0.0114 | (B) TP53 wild in GC |
| APPL1    | 3p14.3   | 10.37 | 10.54 | 0.58 | 0.5  | -0.17 | 1.68E-03 | 0.0114 | (B) TP53 wild in GC |
| FMNL3    | 12q13.12 | 9.89  | 10.15 | 0.79 | 0.87 | -0.26 | 1.69E-03 | 0.0115 | (B) TP53 wild in GC |
| RGS1     | 1q31.2   | 9.72  | 10.16 | 1.46 | 1.35 | -0.44 | 1.70E-03 | 0.0115 | (B) TP53 wild in GC |
| ZNF621   | 3p22.1   | 9.05  | 9.22  | 0.54 | 0.54 | -0.17 | 1.70E-03 | 0.0115 | (B) TP53 wild in GC |
| P3H2     | 3q28     | 7.35  | 7.88  | 1.63 | 1.72 | -0.52 | 1.70E-03 | 0.0115 | (B) TP53 wild in GC |
| DDX5     | 17q23.3  | 12.92 | 13.04 | 0.39 | 0.37 | -0.12 | 1.71E-03 | 0.0116 | (B) TP53 wild in GC |
| ENDOV    | 17q25.3  | 6.27  | 6.52  | 0.85 | 0.77 | -0.26 | 1.71E-03 | 0.0116 | (B) TP53 wild in GC |
| ZFP90    | 16q22.1  | 8.54  | 8.71  | 0.52 | 0.55 | -0.17 | 1.71E-03 | 0.0116 | (B) TP53 wild in GC |
| MED31    | 17p13.1  | 6.55  | 6.74  | 0.59 | 0.56 | -0.18 | 1.72E-03 | 0.0116 | (B) TP53 wild in GC |
| ATP6V1B2 | 8p21.3   | 10.7  | 10.86 | 0.53 | 0.51 | -0.16 | 1.73E-03 | 0.0117 | (B) TP53 wild in GC |
| DENND1C  | 19p13.3  | 8.11  | 8.34  | 0.73 | 0.74 | -0.23 | 1.73E-03 | 0.0117 | (B) TP53 wild in GC |
| FAM160B2 | 8p21.3   | 10    | 10.17 | 0.53 | 0.51 | -0.16 | 1.74E-03 | 0.0117 | (B) TP53 wild in GC |
| PCDH18   | 4q28.3   | 8.9   | 9.22  | 1    | 1.06 | -0.32 | 1.78E-03 | 0.012  | (B) TP53 wild in GC |
| RBM43    | 2q23.3   | 7.22  | 7.47  | 0.81 | 0.85 | -0.26 | 1.79E-03 | 0.012  | (B) TP53 wild in GC |

|          |            |       |       |      |      |       |          |        |                     |
|----------|------------|-------|-------|------|------|-------|----------|--------|---------------------|
| SYK      | 9q22.2     | 10.12 | 10.39 | 0.93 | 0.77 | -0.27 | 1.79E-03 | 0.012  | (B) TP53 wild in GC |
| LCP1     | 13q14.13   | 10.94 | 11.32 | 1.2  | 1.26 | -0.38 | 1.79E-03 | 0.012  | (B) TP53 wild in GC |
| CD274    | 9p24.1     | 5.01  | 5.49  | 1.43 | 1.65 | -0.48 | 1.79E-03 | 0.012  | (B) TP53 wild in GC |
| GPM6B    | Xp22.2     | 5.67  | 6.1   | 1.35 | 1.44 | -0.43 | 1.80E-03 | 0.012  | (B) TP53 wild in GC |
| RELL1    | 4p14       | 9.16  | 9.37  | 0.63 | 0.69 | -0.2  | 1.80E-03 | 0.012  | (B) TP53 wild in GC |
| COX7C    | 5q14.3     | 10.88 | 11.09 | 0.7  | 0.66 | -0.21 | 1.81E-03 | 0.0121 | (B) TP53 wild in GC |
| EPB41L4A | 5q22.1-q22 | 7.96  | 8.32  | 1.14 | 1.12 | -0.35 | 1.82E-03 | 0.0121 | (B) TP53 wild in GC |
| AFF4     | 5q31.1     | 11.3  | 11.49 | 0.57 | 0.68 | -0.19 | 1.82E-03 | 0.0121 | (B) TP53 wild in GC |
| ZNF136   | 19p13.2    | 7.32  | 7.55  | 0.74 | 0.74 | -0.23 | 1.82E-03 | 0.0121 | (B) TP53 wild in GC |
| CD84     | 1q23.3     | 6.64  | 7.14  | 1.59 | 1.63 | -0.5  | 1.82E-03 | 0.0121 | (B) TP53 wild in GC |
| HVCN1    | 12q24.11   | 6.9   | 7.25  | 1.09 | 1.17 | -0.35 | 1.85E-03 | 0.0123 | (B) TP53 wild in GC |
| SKP1     | 5q31.1     | 11.37 | 11.52 | 0.48 | 0.49 | -0.15 | 1.85E-03 | 0.0123 | (B) TP53 wild in GC |
| P2RY13   | 3q25.1     | 5.95  | 6.41  | 1.38 | 1.61 | -0.46 | 1.85E-03 | 0.0123 | (B) TP53 wild in GC |
| TCAF2    | 7q35       | 7.17  | 7.5   | 1.07 | 1.02 | -0.33 | 1.85E-03 | 0.0123 | (B) TP53 wild in GC |
| POU6F1   | 12q13.13   | 6.42  | 6.75  | 0.96 | 1.17 | -0.33 | 1.86E-03 | 0.0123 | (B) TP53 wild in GC |
| CYSLTR1  | Xq21.1     | 4.73  | 5.2   | 1.51 | 1.51 | -0.47 | 1.86E-03 | 0.0123 | (B) TP53 wild in GC |

|         |            |       |       |      |      |       |          |        |                     |
|---------|------------|-------|-------|------|------|-------|----------|--------|---------------------|
| BAG1    | 9p13.3     | 10.25 | 10.46 | 0.68 | 0.67 | -0.21 | 1.87E-03 | 0.0124 | (B) TP53 wild in GC |
| MYCBP2  | 13q22.3    | 10.74 | 10.94 | 0.63 | 0.63 | -0.2  | 1.88E-03 | 0.0124 | (B) TP53 wild in GC |
| DOK2    | 8p21.3     | 6.84  | 7.19  | 1.11 | 1.2  | -0.36 | 1.89E-03 | 0.0124 | (B) TP53 wild in GC |
| SGMS2   | 4q25       | 9.84  | 10.13 | 0.95 | 0.91 | -0.29 | 1.89E-03 | 0.0125 | (B) TP53 wild in GC |
| NCF4    | 22q12.3    | 7.11  | 7.46  | 1.09 | 1.13 | -0.34 | 1.91E-03 | 0.0125 | (B) TP53 wild in GC |
| CSF2RA  | Xp22.33 an | 6.38  | 6.81  | 1.31 | 1.5  | -0.43 | 1.92E-03 | 0.0126 | (B) TP53 wild in GC |
| AP1S2   | Xp22.2     | 7.74  | 8.05  | 0.95 | 1.08 | -0.31 | 1.92E-03 | 0.0126 | (B) TP53 wild in GC |
| HEXB    | 5q13.3     | 11.17 | 11.34 | 0.55 | 0.52 | -0.17 | 1.93E-03 | 0.0126 | (B) TP53 wild in GC |
| AKAP13  | 15q25.3    | 11.88 | 12.07 | 0.6  | 0.66 | -0.19 | 1.93E-03 | 0.0126 | (B) TP53 wild in GC |
| USP4    | 3p21.31    | 9.86  | 9.98  | 0.41 | 0.35 | -0.12 | 1.95E-03 | 0.0127 | (B) TP53 wild in GC |
| PPM1D   | 17q23.2    | 8.39  | 8.52  | 0.4  | 0.42 | -0.13 | 1.96E-03 | 0.0127 | (B) TP53 wild in GC |
| NUDT12  | 5q21.2     | 8.03  | 8.42  | 1.31 | 1.2  | -0.39 | 1.96E-03 | 0.0127 | (B) TP53 wild in GC |
| HLA-DRA | 6p21.32    | 13.28 | 13.72 | 1.44 | 1.35 | -0.43 | 1.96E-03 | 0.0128 | (B) TP53 wild in GC |
| PRRC1   | 5q23.2     | 10.68 | 10.82 | 0.45 | 0.49 | -0.15 | 1.97E-03 | 0.0128 | (B) TP53 wild in GC |
| ADCY6   | 12q13.12   | 9.9   | 10.1  | 0.67 | 0.59 | -0.2  | 1.99E-03 | 0.0129 | (B) TP53 wild in GC |
| ITPRID2 | 2q31.3     | 11.67 | 11.89 | 0.68 | 0.73 | -0.22 | 2.00E-03 | 0.0129 | (B) TP53 wild in GC |



|          |          |       |       |      |      |       |          |        |                     |
|----------|----------|-------|-------|------|------|-------|----------|--------|---------------------|
| ZADH2    | 18q22.3  | 9.3   | 9.49  | 0.63 | 0.53 | -0.18 | 2.00E-03 | 0.013  | (B) TP53 wild in GC |
| BTG2     | 1q32.1   | 11.2  | 11.5  | 0.92 | 1.03 | -0.3  | 2.01E-03 | 0.013  | (B) TP53 wild in GC |
| BTN3A1   | 6p22.2   | 9.4   | 9.67  | 0.91 | 0.82 | -0.27 | 2.01E-03 | 0.013  | (B) TP53 wild in GC |
| S100B    | 21q22.3  | 5.11  | 5.57  | 1.39 | 1.64 | -0.46 | 2.02E-03 | 0.0131 | (B) TP53 wild in GC |
| HLA-DPA1 | 6p21.32  | 11.89 | 12.35 | 1.48 | 1.51 | -0.46 | 2.03E-03 | 0.0131 | (B) TP53 wild in GC |
| PIK3R5   | 17p13.1  | 7.1   | 7.49  | 1.26 | 1.32 | -0.4  | 2.03E-03 | 0.0131 | (B) TP53 wild in GC |
| ANKRD28  | 3p25.1   | 10.02 | 10.18 | 0.5  | 0.52 | -0.16 | 2.03E-03 | 0.0131 | (B) TP53 wild in GC |
| LY9      | 1q23.3   | 5.14  | 5.72  | 1.79 | 1.96 | -0.57 | 2.04E-03 | 0.0131 | (B) TP53 wild in GC |
| PLS3     | Xq23     | 11.13 | 11.35 | 0.76 | 0.65 | -0.22 | 2.04E-03 | 0.0131 | (B) TP53 wild in GC |
| SEMA3B   | 3p21.31  | 9.23  | 9.66  | 1.51 | 1.24 | -0.43 | 2.04E-03 | 0.0131 | (B) TP53 wild in GC |
| ABHD10   | 3q13.2   | 9.18  | 9.33  | 0.46 | 0.52 | -0.15 | 2.05E-03 | 0.0132 | (B) TP53 wild in GC |
| HELQ     | 4q21.23  | 7.29  | 7.42  | 0.4  | 0.43 | -0.13 | 2.05E-03 | 0.0132 | (B) TP53 wild in GC |
| KDM4B    | 19p13.3  | 9.6   | 9.77  | 0.55 | 0.51 | -0.16 | 2.07E-03 | 0.0133 | (B) TP53 wild in GC |
| CABIN1   | 22q11.23 | 11.22 | 11.41 | 0.61 | 0.65 | -0.19 | 2.08E-03 | 0.0133 | (B) TP53 wild in GC |
| GNG7     | 19p13.3  | 6.3   | 6.74  | 1.38 | 1.53 | -0.45 | 2.09E-03 | 0.0133 | (B) TP53 wild in GC |
| LIAS     | 4p14     | 7.09  | 7.27  | 0.6  | 0.58 | -0.18 | 2.09E-03 | 0.0133 | (B) TP53 wild in GC |

|           |          |       |       |      |      |       |          |        |                     |
|-----------|----------|-------|-------|------|------|-------|----------|--------|---------------------|
| TGFBR1    | 9q22.33  | 10.33 | 10.56 | 0.69 | 0.79 | -0.23 | 2.09E-03 | 0.0134 | (B) TP53 wild in GC |
| BTRC      | 10q24.32 | 8.79  | 8.94  | 0.44 | 0.52 | -0.15 | 2.10E-03 | 0.0134 | (B) TP53 wild in GC |
| FER       | 5q21.3   | 5.87  | 6.16  | 0.94 | 0.94 | -0.29 | 2.10E-03 | 0.0134 | (B) TP53 wild in GC |
| WDR55     | 5q31.3   | 9.08  | 9.22  | 0.46 | 0.45 | -0.14 | 2.11E-03 | 0.0134 | (B) TP53 wild in GC |
| RHOH      | 4p14     | 6.48  | 6.91  | 1.31 | 1.47 | -0.42 | 2.12E-03 | 0.0135 | (B) TP53 wild in GC |
| MCTP1     | 5q15     | 6.64  | 7.02  | 1.1  | 1.36 | -0.37 | 2.12E-03 | 0.0135 | (B) TP53 wild in GC |
| ETF1      | 5q31.2   | 11.08 | 11.2  | 0.44 | 0.37 | -0.13 | 2.13E-03 | 0.0135 | (B) TP53 wild in GC |
| RUFY2     | 10q21.3  | 7.83  | 8     | 0.62 | 0.51 | -0.18 | 2.13E-03 | 0.0135 | (B) TP53 wild in GC |
| EFCAB14   | 1p33     | 11.98 | 12.13 | 0.49 | 0.45 | -0.15 | 2.14E-03 | 0.0136 | (B) TP53 wild in GC |
| SOCS2     | 12q22    | 7.91  | 8.2   | 0.95 | 0.97 | -0.29 | 2.14E-03 | 0.0136 | (B) TP53 wild in GC |
| APOL6     | 22q12.3  | 11.6  | 11.85 | 0.77 | 0.84 | -0.25 | 2.15E-03 | 0.0136 | (B) TP53 wild in GC |
| SPN       | 16p11.2  | 7.79  | 8.18  | 1.23 | 1.39 | -0.4  | 2.15E-03 | 0.0136 | (B) TP53 wild in GC |
| LINC02693 | 17p11.2  | 7.28  | 7.57  | 0.94 | 0.95 | -0.29 | 2.16E-03 | 0.0136 | (B) TP53 wild in GC |
| PIGL      | 17p11.2  | 6.54  | 6.75  | 0.74 | 0.67 | -0.22 | 2.16E-03 | 0.0137 | (B) TP53 wild in GC |
| CSF2RB    | 22q12.3  | 8.42  | 8.83  | 1.26 | 1.45 | -0.41 | 2.17E-03 | 0.0137 | (B) TP53 wild in GC |
| NCALD     | 8q22.3   | 7.5   | 7.85  | 1.07 | 1.2  | -0.35 | 2.17E-03 | 0.0137 | (B) TP53 wild in GC |

|           |          |       |       |      |      |       |          |        |                     |
|-----------|----------|-------|-------|------|------|-------|----------|--------|---------------------|
| TLR8      | Xp22.2   | 5.51  | 6.03  | 1.62 | 1.81 | -0.52 | 2.18E-03 | 0.0137 | (B) TP53 wild in GC |
| CNOT6     | 5q35.3   | 9.92  | 10.06 | 0.46 | 0.44 | -0.14 | 2.20E-03 | 0.0138 | (B) TP53 wild in GC |
| ZNF224    | 19q13.31 | 7.13  | 7.38  | 0.83 | 0.73 | -0.24 | 2.20E-03 | 0.0138 | (B) TP53 wild in GC |
| KIAA0586  | 14q23.1  | 8.37  | 8.54  | 0.57 | 0.54 | -0.17 | 2.20E-03 | 0.0138 | (B) TP53 wild in GC |
| INPP5F    | 10q26.11 | 8.64  | 8.82  | 0.55 | 0.65 | -0.18 | 2.22E-03 | 0.0139 | (B) TP53 wild in GC |
| KLHL28    | 14q21.2  | 8.5   | 8.66  | 0.54 | 0.48 | -0.16 | 2.22E-03 | 0.0139 | (B) TP53 wild in GC |
| CD59      | 11p13    | 12.35 | 12.59 | 0.75 | 0.81 | -0.24 | 2.22E-03 | 0.0139 | (B) TP53 wild in GC |
| CLUAP1    | 16p13.3  | 8.13  | 8.31  | 0.61 | 0.57 | -0.18 | 2.23E-03 | 0.0139 | (B) TP53 wild in GC |
| C12ORF4   | 12p13.32 | 8.29  | 8.45  | 0.53 | 0.48 | -0.16 | 2.23E-03 | 0.0139 | (B) TP53 wild in GC |
| ICAM2     | 17q23.3  | 7.96  | 8.25  | 0.91 | 1.04 | -0.3  | 2.24E-03 | 0.014  | (B) TP53 wild in GC |
| HLA-F-AS1 | 6p22.1   | 4.76  | 5.07  | 0.97 | 1.09 | -0.31 | 2.25E-03 | 0.014  | (B) TP53 wild in GC |
| RAPGEF2   | 4q32.1   | 9.59  | 9.76  | 0.54 | 0.55 | -0.17 | 2.25E-03 | 0.014  | (B) TP53 wild in GC |
| HNRNPA1   | 12q13.13 | 12.17 | 12.33 | 0.49 | 0.5  | -0.15 | 2.27E-03 | 0.0141 | (B) TP53 wild in GC |
| ISCU      | 12q23.3  | 10.32 | 10.47 | 0.48 | 0.52 | -0.15 | 2.27E-03 | 0.0141 | (B) TP53 wild in GC |
| USP15     | 12q14.1  | 9.93  | 10.08 | 0.49 | 0.49 | -0.15 | 2.27E-03 | 0.0141 | (B) TP53 wild in GC |
| MPEG1     | 11q12.1  | 9.36  | 9.78  | 1.32 | 1.44 | -0.42 | 2.28E-03 | 0.0141 | (B) TP53 wild in GC |

|         |            |       |       |      |      |       |          |        |                     |
|---------|------------|-------|-------|------|------|-------|----------|--------|---------------------|
| ATP5F1A | 18q21.1    | 12.55 | 12.73 | 0.62 | 0.57 | -0.18 | 2.28E-03 | 0.0142 | (B) TP53 wild in GC |
| IL21R   | 16p12.1    | 5.97  | 6.42  | 1.5  | 1.5  | -0.46 | 2.30E-03 | 0.0143 | (B) TP53 wild in GC |
| PCM1    | 8p22       | 11.07 | 11.28 | 0.74 | 0.6  | -0.21 | 2.31E-03 | 0.0143 | (B) TP53 wild in GC |
| DPYD    | 1p21.3     | 8.42  | 8.82  | 1.23 | 1.39 | -0.4  | 2.31E-03 | 0.0143 | (B) TP53 wild in GC |
| AIF1    | 6p21.33    | 8.09  | 8.43  | 1.11 | 1.2  | -0.35 | 2.33E-03 | 0.0144 | (B) TP53 wild in GC |
| NUMB    | 14q24.2-q2 | 10.85 | 10.95 | 0.35 | 0.37 | -0.11 | 2.35E-03 | 0.0145 | (B) TP53 wild in GC |
| CCDC66  | 3p14.3     | 7.52  | 7.72  | 0.71 | 0.63 | -0.21 | 2.35E-03 | 0.0145 | (B) TP53 wild in GC |
| RPL34   | 4q25       | 11.99 | 12.22 | 0.77 | 0.75 | -0.23 | 2.36E-03 | 0.0145 | (B) TP53 wild in GC |
| PARP3   | 3p21.2     | 8.63  | 8.86  | 0.8  | 0.76 | -0.24 | 2.36E-03 | 0.0145 | (B) TP53 wild in GC |
| POGLUT1 | 3q13.33    | 8.54  | 8.68  | 0.46 | 0.46 | -0.14 | 2.36E-03 | 0.0146 | (B) TP53 wild in GC |
| FOLR2   | 11q13.4    | 6.53  | 7.05  | 1.69 | 1.74 | -0.52 | 2.37E-03 | 0.0146 | (B) TP53 wild in GC |
| KLF12   | 13q22.1    | 8.01  | 8.4   | 1.27 | 1.28 | -0.39 | 2.37E-03 | 0.0146 | (B) TP53 wild in GC |
| QKI     | 6q26       | 10.07 | 10.34 | 0.85 | 0.95 | -0.27 | 2.38E-03 | 0.0146 | (B) TP53 wild in GC |
| SNX2    | 5q23.2     | 10.08 | 10.23 | 0.5  | 0.48 | -0.15 | 2.38E-03 | 0.0146 | (B) TP53 wild in GC |
| RPS14   | 5q33.1     | 13.45 | 13.64 | 0.66 | 0.61 | -0.19 | 2.38E-03 | 0.0146 | (B) TP53 wild in GC |
| SIDT1   | 3q13.2     | 6.71  | 7.23  | 1.81 | 1.55 | -0.52 | 2.40E-03 | 0.0147 | (B) TP53 wild in GC |

|          |          |       |       |      |      |       |          |        |                     |
|----------|----------|-------|-------|------|------|-------|----------|--------|---------------------|
| PRDM1    | 6q21     | 9.78  | 10.06 | 0.94 | 0.92 | -0.28 | 2.40E-03 | 0.0147 | (B) TP53 wild in GC |
| FRYL     | 4p11     | 10.46 | 10.66 | 0.71 | 0.59 | -0.2  | 2.42E-03 | 0.0148 | (B) TP53 wild in GC |
| SLFN12L  | 17q12    | 4.37  | 4.81  | 1.43 | 1.48 | -0.44 | 2.43E-03 | 0.0148 | (B) TP53 wild in GC |
| BANK1    | 4q24     | 6.43  | 6.98  | 1.8  | 1.86 | -0.55 | 2.43E-03 | 0.0149 | (B) TP53 wild in GC |
| COPS3    | 17p11.2  | 9.69  | 9.83  | 0.48 | 0.44 | -0.14 | 2.43E-03 | 0.0149 | (B) TP53 wild in GC |
| ADARB1   | 21q22.3  | 8.45  | 8.72  | 0.89 | 0.93 | -0.28 | 2.44E-03 | 0.0149 | (B) TP53 wild in GC |
| TRANK1   | 3p22.2   | 9.28  | 9.57  | 0.91 | 0.99 | -0.29 | 2.45E-03 | 0.015  | (B) TP53 wild in GC |
| TLN2     | 15q22.2  | 9.56  | 9.88  | 1.11 | 0.96 | -0.32 | 2.46E-03 | 0.015  | (B) TP53 wild in GC |
| GBP2     | 1p22.2   | 10.47 | 10.79 | 1    | 1.1  | -0.31 | 2.47E-03 | 0.015  | (B) TP53 wild in GC |
| VCAM1    | 1p21.2   | 8.82  | 9.18  | 1.12 | 1.24 | -0.36 | 2.47E-03 | 0.015  | (B) TP53 wild in GC |
| PTPRCAP  | 11q13.2  | 7.76  | 8.23  | 1.55 | 1.57 | -0.47 | 2.48E-03 | 0.0151 | (B) TP53 wild in GC |
| CIITA    | 16p13.13 | 8.69  | 9.16  | 1.54 | 1.6  | -0.47 | 2.52E-03 | 0.0152 | (B) TP53 wild in GC |
| ARID5B   | 10q21.2  | 10.6  | 10.85 | 0.84 | 0.79 | -0.25 | 2.53E-03 | 0.0153 | (B) TP53 wild in GC |
| EEF1A1P9 | 4q24     | 7.37  | 7.85  | 1.59 | 1.64 | -0.49 | 2.55E-03 | 0.0154 | (B) TP53 wild in GC |
| CST7     | 20p11.21 | 7.03  | 7.45  | 1.42 | 1.44 | -0.43 | 2.60E-03 | 0.0156 | (B) TP53 wild in GC |
| STIM2    | 4p15.2   | 9.2   | 9.38  | 0.61 | 0.53 | -0.17 | 2.61E-03 | 0.0157 | (B) TP53 wild in GC |

|          |          |       |       |      |      |       |          |        |                     |
|----------|----------|-------|-------|------|------|-------|----------|--------|---------------------|
| ARHGDIB  | 12p12.3  | 10.68 | 10.97 | 0.95 | 0.97 | -0.29 | 2.62E-03 | 0.0157 | (B) TP53 wild in GC |
| NUDT2    | 9p13.3   | 7.47  | 7.68  | 0.7  | 0.7  | -0.21 | 2.65E-03 | 0.0159 | (B) TP53 wild in GC |
| TLCD3A   | 17p13.3  | 9.39  | 9.6   | 0.64 | 0.78 | -0.21 | 2.69E-03 | 0.016  | (B) TP53 wild in GC |
| SNX20    | 16q12.1  | 5.76  | 6.15  | 1.24 | 1.37 | -0.39 | 2.70E-03 | 0.0161 | (B) TP53 wild in GC |
| ABL1     | 9q34.12  | 11.31 | 11.48 | 0.56 | 0.62 | -0.18 | 2.70E-03 | 0.0161 | (B) TP53 wild in GC |
| GUF1     | 4p12     | 9.76  | 9.92  | 0.55 | 0.51 | -0.16 | 2.72E-03 | 0.0162 | (B) TP53 wild in GC |
| TRIM38   | 6p22.2   | 9.02  | 9.22  | 0.71 | 0.63 | -0.2  | 2.72E-03 | 0.0162 | (B) TP53 wild in GC |
| PLA2G4A  | 1q31.1   | 7.94  | 8.4   | 1.63 | 1.43 | -0.46 | 2.74E-03 | 0.0162 | (B) TP53 wild in GC |
| PARVG    | 22q13.31 | 7.25  | 7.59  | 1.12 | 1.16 | -0.34 | 2.75E-03 | 0.0163 | (B) TP53 wild in GC |
| LRRN3    | 7q31.1   | 3.45  | 3.89  | 1.42 | 1.51 | -0.44 | 2.77E-03 | 0.0164 | (B) TP53 wild in GC |
| ALDH3A2  | 17p11.2  | 10.54 | 10.76 | 0.72 | 0.7  | -0.21 | 2.78E-03 | 0.0164 | (B) TP53 wild in GC |
| GIN1     | 5q21.1   | 6.43  | 6.6   | 0.51 | 0.61 | -0.17 | 2.78E-03 | 0.0164 | (B) TP53 wild in GC |
| TMEM131L | 4q31.3   | 8.3   | 8.57  | 0.87 | 0.91 | -0.26 | 2.80E-03 | 0.0165 | (B) TP53 wild in GC |
| SLC35A5  | 3q13.2   | 9.16  | 9.31  | 0.47 | 0.52 | -0.15 | 2.80E-03 | 0.0165 | (B) TP53 wild in GC |
| TOP2B    | 3p24.2   | 11.14 | 11.3  | 0.56 | 0.55 | -0.17 | 2.83E-03 | 0.0166 | (B) TP53 wild in GC |
| CCL4     | 17q12    | 7.17  | 7.61  | 1.47 | 1.46 | -0.44 | 2.85E-03 | 0.0167 | (B) TP53 wild in GC |

|          |            |       |       |      |      |       |          |        |                     |
|----------|------------|-------|-------|------|------|-------|----------|--------|---------------------|
| C3AR1    | 12p13.31   | 7.77  | 8.16  | 1.28 | 1.38 | -0.39 | 2.87E-03 | 0.0168 | (B) TP53 wild in GC |
| NUP88    | 17p13.2    | 9.7   | 9.85  | 0.48 | 0.49 | -0.14 | 2.87E-03 | 0.0168 | (B) TP53 wild in GC |
| CXORF21  | Xp21.2     | 4.86  | 5.23  | 1.18 | 1.27 | -0.36 | 2.88E-03 | 0.0168 | (B) TP53 wild in GC |
| ZNF652   | 17q21.32-q | 10.38 | 10.52 | 0.46 | 0.48 | -0.14 | 2.89E-03 | 0.0169 | (B) TP53 wild in GC |
| ZNF45    | 19q13.31   | 7.63  | 7.81  | 0.69 | 0.5  | -0.18 | 2.90E-03 | 0.0169 | (B) TP53 wild in GC |
| GNB4     | 3q26.33    | 9.44  | 9.77  | 1.04 | 1.17 | -0.33 | 2.90E-03 | 0.0169 | (B) TP53 wild in GC |
| BDH2     | 4q24       | 8.02  | 8.29  | 0.92 | 0.83 | -0.26 | 2.91E-03 | 0.017  | (B) TP53 wild in GC |
| LIMA1    | 12q13.12   | 11.7  | 11.94 | 0.79 | 0.81 | -0.24 | 2.93E-03 | 0.0171 | (B) TP53 wild in GC |
| CFL2     | 14q13.1    | 8.81  | 9.2   | 1.18 | 1.43 | -0.38 | 2.93E-03 | 0.0171 | (B) TP53 wild in GC |
| ADH5     | 4q23       | 10.65 | 10.81 | 0.53 | 0.52 | -0.16 | 2.94E-03 | 0.0171 | (B) TP53 wild in GC |
| KDM4C    | 9p24.1     | 9.18  | 9.36  | 0.64 | 0.53 | -0.18 | 2.94E-03 | 0.0171 | (B) TP53 wild in GC |
| ARHGAP25 | 2p13.3     | 7.63  | 7.96  | 1.1  | 1.17 | -0.34 | 2.96E-03 | 0.0172 | (B) TP53 wild in GC |
| RACK1    | 5q35.3     | 14.23 | 14.41 | 0.59 | 0.62 | -0.18 | 2.96E-03 | 0.0172 | (B) TP53 wild in GC |
| ITGB2    | 21q22.3    | 9.87  | 10.27 | 1.38 | 1.33 | -0.4  | 2.98E-03 | 0.0173 | (B) TP53 wild in GC |
| ZFAND5   | 9q21.13    | 11.59 | 11.73 | 0.51 | 0.42 | -0.14 | 2.98E-03 | 0.0173 | (B) TP53 wild in GC |
| EIF4E3   | 3p13       | 8.9   | 9.17  | 0.88 | 0.97 | -0.27 | 2.98E-03 | 0.0173 | (B) TP53 wild in GC |

|         |          |       |       |      |      |       |          |        |                     |
|---------|----------|-------|-------|------|------|-------|----------|--------|---------------------|
| PTEN    | 10q23.31 | 10.68 | 10.86 | 0.57 | 0.63 | -0.18 | 2.99E-03 | 0.0173 | (B) TP53 wild in GC |
| ERAP2   | 5q15     | 9.38  | 9.93  | 1.88 | 1.81 | -0.55 | 2.99E-03 | 0.0173 | (B) TP53 wild in GC |
| WASHC2C | 10q11.22 | 10.12 | 10.25 | 0.47 | 0.44 | -0.14 | 3.00E-03 | 0.0174 | (B) TP53 wild in GC |
| ZNF791  | 19p13.13 | 8.22  | 8.38  | 0.55 | 0.55 | -0.16 | 3.00E-03 | 0.0174 | (B) TP53 wild in GC |
| DIS3L   | 15q22.31 | 9.05  | 9.22  | 0.58 | 0.49 | -0.16 | 3.02E-03 | 0.0175 | (B) TP53 wild in GC |
| TPK1    | 7q35     | 6.87  | 7.17  | 1.08 | 0.94 | -0.3  | 3.03E-03 | 0.0175 | (B) TP53 wild in GC |
| TRIM35  | 8p21.2   | 8.76  | 8.91  | 0.52 | 0.48 | -0.15 | 3.03E-03 | 0.0175 | (B) TP53 wild in GC |
| ZFAND6  | 15q25.1  | 9.82  | 9.95  | 0.4  | 0.45 | -0.12 | 3.04E-03 | 0.0175 | (B) TP53 wild in GC |
| EPS15   | 1p32.3   | 10.49 | 10.62 | 0.45 | 0.45 | -0.13 | 3.04E-03 | 0.0175 | (B) TP53 wild in GC |
| SEPTIN8 | 5q31.1   | 10.36 | 10.49 | 0.44 | 0.42 | -0.13 | 3.05E-03 | 0.0175 | (B) TP53 wild in GC |
| SAMD9L  | 7q21.2   | 9.68  | 10.08 | 1.36 | 1.32 | -0.4  | 3.07E-03 | 0.0176 | (B) TP53 wild in GC |
| TARSL2  | 15q26.3  | 7.58  | 7.78  | 0.64 | 0.68 | -0.2  | 3.07E-03 | 0.0176 | (B) TP53 wild in GC |
| ZNF627  | 19p13.2  | 7.96  | 8.11  | 0.51 | 0.44 | -0.14 | 3.08E-03 | 0.0177 | (B) TP53 wild in GC |
| SCIMP   | 17p13.2  | 5.04  | 5.49  | 1.48 | 1.6  | -0.45 | 3.11E-03 | 0.0178 | (B) TP53 wild in GC |
| SLC4A5  | 2p13.1   | 7.33  | 7.55  | 0.72 | 0.73 | -0.21 | 3.13E-03 | 0.0179 | (B) TP53 wild in GC |
| RBM27   | 5q32     | 9.9   | 10    | 0.37 | 0.34 | -0.1  | 3.15E-03 | 0.0179 | (B) TP53 wild in GC |



|           |            |       |       |      |      |       |          |        |                     |
|-----------|------------|-------|-------|------|------|-------|----------|--------|---------------------|
| PPP1R12B  | 1q32.1     | 10.85 | 11.33 | 1.48 | 1.81 | -0.48 | 3.15E-03 | 0.0179 | (B) TP53 wild in GC |
| APPBP2    | 17q23.2    | 9.66  | 9.79  | 0.42 | 0.47 | -0.13 | 3.17E-03 | 0.018  | (B) TP53 wild in GC |
| NPR2      | 9p13.3     | 7.09  | 7.36  | 0.91 | 0.93 | -0.27 | 3.18E-03 | 0.018  | (B) TP53 wild in GC |
| IDO1      | 8p11.21    | 7.51  | 8.2   | 2.17 | 2.52 | -0.69 | 3.18E-03 | 0.018  | (B) TP53 wild in GC |
| DNAJB14   | 4q23       | 8.23  | 8.38  | 0.52 | 0.51 | -0.15 | 3.18E-03 | 0.0181 | (B) TP53 wild in GC |
| POLR2B    | 4q12       | 10.88 | 11    | 0.43 | 0.43 | -0.13 | 3.21E-03 | 0.0182 | (B) TP53 wild in GC |
| USP38     | 4q31.21    | 9.91  | 10.05 | 0.54 | 0.45 | -0.15 | 3.22E-03 | 0.0182 | (B) TP53 wild in GC |
| KIAA2026  | 9p24.1     | 9.83  | 10.03 | 0.73 | 0.6  | -0.2  | 3.23E-03 | 0.0182 | (B) TP53 wild in GC |
| RGMB      | 5q15       | 9.38  | 9.67  | 0.94 | 1.08 | -0.29 | 3.23E-03 | 0.0182 | (B) TP53 wild in GC |
| GBE1      | 3p12.2     | 8.43  | 8.6   | 0.58 | 0.62 | -0.18 | 3.24E-03 | 0.0183 | (B) TP53 wild in GC |
| AP5M1     | 14q22.3    | 9.65  | 9.79  | 0.48 | 0.46 | -0.14 | 3.26E-03 | 0.0184 | (B) TP53 wild in GC |
| LINC00663 | 19p13.11   | 4.31  | 4.59  | 0.89 | 1.01 | -0.28 | 3.27E-03 | 0.0184 | (B) TP53 wild in GC |
| LRFN3     | 19q13.12   | 8.68  | 8.88  | 0.78 | 0.54 | -0.2  | 3.27E-03 | 0.0184 | (B) TP53 wild in GC |
| PHTF2     | 7q11.23-q2 | 8.8   | 8.97  | 0.57 | 0.56 | -0.17 | 3.27E-03 | 0.0184 | (B) TP53 wild in GC |
| NOL8      | 9q22.31    | 9.39  | 9.54  | 0.54 | 0.49 | -0.15 | 3.27E-03 | 0.0184 | (B) TP53 wild in GC |
| DENND4C   | 9p22.1     | 10.41 | 10.6  | 0.65 | 0.58 | -0.18 | 3.30E-03 | 0.0185 | (B) TP53 wild in GC |

|          |          |       |       |      |      |       |          |        |                     |
|----------|----------|-------|-------|------|------|-------|----------|--------|---------------------|
| LAIR1    | 19q13.42 | 8.45  | 8.81  | 1.19 | 1.23 | -0.35 | 3.32E-03 | 0.0186 | (B) TP53 wild in GC |
| CLEC2B   | 12p13.31 | 7.26  | 7.58  | 1.07 | 1.14 | -0.32 | 3.32E-03 | 0.0186 | (B) TP53 wild in GC |
| POLK     | 5q13.3   | 8.59  | 8.77  | 0.56 | 0.66 | -0.18 | 3.33E-03 | 0.0186 | (B) TP53 wild in GC |
| EVI5     | 1p22.1   | 9.17  | 9.32  | 0.52 | 0.55 | -0.16 | 3.38E-03 | 0.0188 | (B) TP53 wild in GC |
| COPS4    | 4q21.22  | 9.23  | 9.34  | 0.39 | 0.41 | -0.12 | 3.38E-03 | 0.0188 | (B) TP53 wild in GC |
| HLA-DOA  | 6p21.32  | 8.23  | 8.73  | 1.7  | 1.75 | -0.5  | 3.42E-03 | 0.019  | (B) TP53 wild in GC |
| CTTNBP2N | 1p13.2   | 9.87  | 10.02 | 0.49 | 0.53 | -0.15 | 3.43E-03 | 0.0191 | (B) TP53 wild in GC |
| PSTPIP1  | 15q24.3  | 5.86  | 6.19  | 1.11 | 1.19 | -0.33 | 3.46E-03 | 0.0192 | (B) TP53 wild in GC |
| SETD2    | 3p21.31  | 10.89 | 11.03 | 0.48 | 0.49 | -0.14 | 3.47E-03 | 0.0192 | (B) TP53 wild in GC |
| GSAP     | 7q11.23  | 8.11  | 8.35  | 0.86 | 0.78 | -0.24 | 3.47E-03 | 0.0192 | (B) TP53 wild in GC |
| FAM49A   | 2p24.2   | 6.06  | 6.44  | 1.21 | 1.4  | -0.38 | 3.49E-03 | 0.0193 | (B) TP53 wild in GC |
| ADAM19   | 5q33.3   | 9.33  | 9.61  | 0.93 | 1.05 | -0.29 | 3.52E-03 | 0.0194 | (B) TP53 wild in GC |
| ZNF430   | 19p12    | 7.08  | 7.29  | 0.78 | 0.69 | -0.22 | 3.53E-03 | 0.0195 | (B) TP53 wild in GC |
| ZNF230   | 19q13.31 | 6.15  | 6.34  | 0.72 | 0.6  | -0.2  | 3.56E-03 | 0.0196 | (B) TP53 wild in GC |
| ANKRD34A | 1q21.1   | 4.65  | 4.94  | 0.99 | 1.02 | -0.29 | 3.56E-03 | 0.0196 | (B) TP53 wild in GC |
| CLIC4    | 1p36.11  | 11.56 | 11.85 | 0.92 | 1.05 | -0.28 | 3.58E-03 | 0.0196 | (B) TP53 wild in GC |

|          |            |       |       |      |      |       |          |        |                     |
|----------|------------|-------|-------|------|------|-------|----------|--------|---------------------|
| HCST     | 19q13.12   | 6.65  | 7.05  | 1.34 | 1.38 | -0.39 | 3.68E-03 | 0.0201 | (B) TP53 wild in GC |
| GTPBP8   | 3q13.2     | 7.12  | 7.25  | 0.45 | 0.45 | -0.13 | 3.68E-03 | 0.0201 | (B) TP53 wild in GC |
| PEAK1    | 15q24.3    | 10.55 | 10.75 | 0.63 | 0.7  | -0.19 | 3.72E-03 | 0.0203 | (B) TP53 wild in GC |
| ABI3     | 17q21.32   | 7.98  | 8.25  | 0.93 | 1    | -0.28 | 3.74E-03 | 0.0204 | (B) TP53 wild in GC |
| PPP1R12A | 12q21.2-q2 | 10.71 | 10.9  | 0.62 | 0.74 | -0.19 | 3.74E-03 | 0.0204 | (B) TP53 wild in GC |
| EXOC5    | 14q22.3    | 10.08 | 10.22 | 0.46 | 0.44 | -0.13 | 3.75E-03 | 0.0204 | (B) TP53 wild in GC |
| NAV1     | 1q32.1     | 10.03 | 10.28 | 0.83 | 0.92 | -0.25 | 3.76E-03 | 0.0204 | (B) TP53 wild in GC |
| RECK     | 9p13.3     | 7.17  | 7.51  | 1.1  | 1.31 | -0.35 | 3.77E-03 | 0.0205 | (B) TP53 wild in GC |
| HAGHL    | 16p13.3    | 6.18  | 6.58  | 1.48 | 1.25 | -0.4  | 3.79E-03 | 0.0206 | (B) TP53 wild in GC |
| CLASP2   | 3p22.3     | 9.64  | 9.79  | 0.52 | 0.5  | -0.15 | 3.83E-03 | 0.0207 | (B) TP53 wild in GC |
| TUBGCP5  | 15q11.2    | 8     | 8.16  | 0.58 | 0.54 | -0.16 | 3.83E-03 | 0.0207 | (B) TP53 wild in GC |
| BMPR2    | 2q33.1-q33 | 11.32 | 11.5  | 0.58 | 0.64 | -0.18 | 3.85E-03 | 0.0208 | (B) TP53 wild in GC |
| CCDC69   | 5q33.1     | 9.02  | 9.41  | 1.26 | 1.48 | -0.39 | 3.89E-03 | 0.021  | (B) TP53 wild in GC |
| SAT1     | Xp22.11    | 12.23 | 12.47 | 0.8  | 0.87 | -0.24 | 3.90E-03 | 0.021  | (B) TP53 wild in GC |
| ETHE1    | 19q13.31   | 9.99  | 10.27 | 0.95 | 0.97 | -0.28 | 3.90E-03 | 0.021  | (B) TP53 wild in GC |
| EIF4EBP2 | 10q22.1    | 12.09 | 12.24 | 0.56 | 0.46 | -0.15 | 3.90E-03 | 0.021  | (B) TP53 wild in GC |

|         |          |       |       |      |      |       |          |        |                     |
|---------|----------|-------|-------|------|------|-------|----------|--------|---------------------|
| CX3CR1  | 3p22.2   | 4.87  | 5.33  | 1.44 | 1.76 | -0.46 | 3.91E-03 | 0.021  | (B) TP53 wild in GC |
| HARS    | 5q31.3   | 9.8   | 9.91  | 0.4  | 0.35 | -0.11 | 3.92E-03 | 0.021  | (B) TP53 wild in GC |
| TBX21   | 17q21.32 | 3.84  | 4.28  | 1.52 | 1.56 | -0.44 | 3.92E-03 | 0.021  | (B) TP53 wild in GC |
| INTS12  | 4q24     | 8.42  | 8.55  | 0.49 | 0.45 | -0.14 | 3.93E-03 | 0.0211 | (B) TP53 wild in GC |
| LAPTM5  | 1p35.2   | 11.58 | 11.92 | 1.15 | 1.21 | -0.34 | 3.93E-03 | 0.0211 | (B) TP53 wild in GC |
| SRFBP1  | 5q23.1   | 7.86  | 8     | 0.51 | 0.46 | -0.14 | 3.95E-03 | 0.0211 | (B) TP53 wild in GC |
| ERCC6L2 | 9q22.32  | 7.24  | 7.47  | 0.81 | 0.8  | -0.23 | 3.96E-03 | 0.0212 | (B) TP53 wild in GC |
| MMP28   | 17q12    | 7.23  | 7.73  | 1.61 | 1.86 | -0.5  | 3.97E-03 | 0.0212 | (B) TP53 wild in GC |
| KLHL6   | 3q27.1   | 7.41  | 7.81  | 1.3  | 1.47 | -0.39 | 3.98E-03 | 0.0213 | (B) TP53 wild in GC |
| ZNF223  | 19q13.31 | 5.62  | 5.92  | 1.16 | 0.9  | -0.31 | 3.98E-03 | 0.0213 | (B) TP53 wild in GC |
| RCHY1   | 4q21.1   | 8.53  | 8.68  | 0.53 | 0.54 | -0.15 | 3.99E-03 | 0.0213 | (B) TP53 wild in GC |
| ZNF330  | 4q31.21  | 8.74  | 8.88  | 0.51 | 0.47 | -0.14 | 3.99E-03 | 0.0213 | (B) TP53 wild in GC |
| POLR1E  | 9p13.2   | 8.47  | 8.62  | 0.54 | 0.52 | -0.15 | 4.01E-03 | 0.0214 | (B) TP53 wild in GC |
| LAX1    | 1q32.1   | 5.67  | 6.15  | 1.69 | 1.69 | -0.49 | 4.02E-03 | 0.0214 | (B) TP53 wild in GC |
| DPCD    | 10q24.32 | 7.31  | 7.52  | 0.74 | 0.69 | -0.21 | 4.03E-03 | 0.0214 | (B) TP53 wild in GC |
| LYST    | 1q42.3   | 9.21  | 9.42  | 0.68 | 0.79 | -0.21 | 4.03E-03 | 0.0215 | (B) TP53 wild in GC |

|         |            |       |       |      |      |       |          |        |                     |
|---------|------------|-------|-------|------|------|-------|----------|--------|---------------------|
| ZBTB46  | 20q13.33   | 7.11  | 7.39  | 0.97 | 0.98 | -0.28 | 4.04E-03 | 0.0215 | (B) TP53 wild in GC |
| KLHL9   | 9p21.3     | 9.49  | 9.72  | 0.83 | 0.79 | -0.23 | 4.06E-03 | 0.0216 | (B) TP53 wild in GC |
| RPAIN   | 17p13.2    | 8.77  | 8.93  | 0.58 | 0.53 | -0.16 | 4.06E-03 | 0.0216 | (B) TP53 wild in GC |
| SEC22C  | 3p22.1     | 8.26  | 8.39  | 0.48 | 0.43 | -0.13 | 4.07E-03 | 0.0216 | (B) TP53 wild in GC |
| UBA5    | 3q22.1     | 9.23  | 9.35  | 0.45 | 0.39 | -0.12 | 4.08E-03 | 0.0216 | (B) TP53 wild in GC |
| TFAP2A  | 6p24.3     | 8.01  | 8.52  | 1.95 | 1.52 | -0.51 | 4.08E-03 | 0.0216 | (B) TP53 wild in GC |
| PTCD2   | 5q13.2     | 6.68  | 6.83  | 0.55 | 0.47 | -0.15 | 4.08E-03 | 0.0216 | (B) TP53 wild in GC |
| RYR3    | 15q13.3-q1 | 3.3   | 3.81  | 1.66 | 1.99 | -0.52 | 4.10E-03 | 0.0217 | (B) TP53 wild in GC |
| MIS12   | 17p13.2    | 8.31  | 8.44  | 0.5  | 0.41 | -0.13 | 4.10E-03 | 0.0217 | (B) TP53 wild in GC |
| EMB     | 5q11.1     | 9.64  | 10.03 | 1.39 | 1.28 | -0.39 | 4.11E-03 | 0.0217 | (B) TP53 wild in GC |
| GBP5    | 1p22.2     | 8.34  | 8.85  | 1.76 | 1.75 | -0.5  | 4.11E-03 | 0.0217 | (B) TP53 wild in GC |
| ERCC5   | 13q33.1    | 10.13 | 10.27 | 0.54 | 0.47 | -0.15 | 4.13E-03 | 0.0218 | (B) TP53 wild in GC |
| ANK3    | 10q21.2    | 8.97  | 9.25  | 1.08 | 0.79 | -0.28 | 4.15E-03 | 0.0219 | (B) TP53 wild in GC |
| RBPJ    | 4p15.2     | 9.88  | 10.02 | 0.49 | 0.47 | -0.14 | 4.16E-03 | 0.0219 | (B) TP53 wild in GC |
| ATP9B   | 18q23      | 8.69  | 8.86  | 0.66 | 0.54 | -0.17 | 4.17E-03 | 0.022  | (B) TP53 wild in GC |
| SLC30A5 | 5q13.1-q13 | 9.9   | 10.01 | 0.4  | 0.39 | -0.11 | 4.18E-03 | 0.022  | (B) TP53 wild in GC |

|           |          |       |       |      |      |       |          |        |                     |
|-----------|----------|-------|-------|------|------|-------|----------|--------|---------------------|
| ZNF543    | 19q13.43 | 7.14  | 7.35  | 0.8  | 0.72 | -0.22 | 4.20E-03 | 0.0221 | (B) TP53 wild in GC |
| SPTLC2    | 14q24.3  | 10.7  | 10.87 | 0.61 | 0.63 | -0.18 | 4.22E-03 | 0.0221 | (B) TP53 wild in GC |
| ZC3HAV1   | 7q34     | 10.78 | 10.9  | 0.41 | 0.4  | -0.12 | 4.27E-03 | 0.0224 | (B) TP53 wild in GC |
| SLC8A1    | 2p22.1   | 7.94  | 8.28  | 1.08 | 1.33 | -0.34 | 4.30E-03 | 0.0225 | (B) TP53 wild in GC |
| SLC25A23  | 19p13.3  | 10.94 | 11.17 | 0.72 | 0.86 | -0.22 | 4.30E-03 | 0.0225 | (B) TP53 wild in GC |
| ZNF317    | 19p13.2  | 9.69  | 9.83  | 0.57 | 0.31 | -0.14 | 4.34E-03 | 0.0227 | (B) TP53 wild in GC |
| CAAP1     | 9p21.2   | 8.64  | 8.87  | 0.81 | 0.81 | -0.23 | 4.37E-03 | 0.0228 | (B) TP53 wild in GC |
| ADAM28    | 8p21.2   | 8.19  | 8.7   | 1.79 | 1.81 | -0.51 | 4.39E-03 | 0.0229 | (B) TP53 wild in GC |
| TOX       | 8q12.1   | 7.2   | 7.7   | 1.86 | 1.65 | -0.5  | 4.40E-03 | 0.0229 | (B) TP53 wild in GC |
| GPR155    | 2q31.1   | 7.9   | 8.28  | 1.33 | 1.37 | -0.38 | 4.41E-03 | 0.023  | (B) TP53 wild in GC |
| SAR1A     | 10q22.1  | 10.5  | 10.61 | 0.44 | 0.38 | -0.12 | 4.41E-03 | 0.023  | (B) TP53 wild in GC |
| ANKHD1-EI | 5q31.3   | 9.84  | 10.03 | 0.71 | 0.67 | -0.2  | 4.42E-03 | 0.023  | (B) TP53 wild in GC |
| GPR107    | 9q34.11  | 11.13 | 11.27 | 0.45 | 0.55 | -0.14 | 4.44E-03 | 0.0231 | (B) TP53 wild in GC |
| SLAMF1    | 1q23.3   | 5.02  | 5.43  | 1.43 | 1.45 | -0.41 | 4.47E-03 | 0.0232 | (B) TP53 wild in GC |
| MICU3     | 8p22     | 4.7   | 5.11  | 1.31 | 1.59 | -0.41 | 4.47E-03 | 0.0232 | (B) TP53 wild in GC |
| CD244     | 1q23.3   | 3.92  | 4.35  | 1.46 | 1.57 | -0.43 | 4.50E-03 | 0.0233 | (B) TP53 wild in GC |

|          |            |       |       |      |      |       |          |        |                     |
|----------|------------|-------|-------|------|------|-------|----------|--------|---------------------|
| IRF4     | 6p25.3     | 6.58  | 7.06  | 1.68 | 1.75 | -0.48 | 4.51E-03 | 0.0233 | (B) TP53 wild in GC |
| ISOC1    | 5q23.3     | 9.2   | 9.36  | 0.56 | 0.53 | -0.16 | 4.54E-03 | 0.0234 | (B) TP53 wild in GC |
| PPA2     | 4q24       | 9.77  | 9.92  | 0.52 | 0.54 | -0.15 | 4.55E-03 | 0.0235 | (B) TP53 wild in GC |
| SHPK     | 17p13.2    | 8.92  | 9.08  | 0.57 | 0.57 | -0.16 | 4.56E-03 | 0.0235 | (B) TP53 wild in GC |
| CALHM6   | 6q22.1     | 6.1   | 6.54  | 1.57 | 1.54 | -0.44 | 4.57E-03 | 0.0235 | (B) TP53 wild in GC |
| PARP15   | 3q21.1     | 4.71  | 5.2   | 1.73 | 1.79 | -0.5  | 4.57E-03 | 0.0235 | (B) TP53 wild in GC |
| OXNAD1   | 3p25.1-p24 | 7.93  | 8.07  | 0.51 | 0.48 | -0.14 | 4.59E-03 | 0.0236 | (B) TP53 wild in GC |
| FGL2     | 7q11.23    | 9.37  | 9.82  | 1.5  | 1.69 | -0.45 | 4.60E-03 | 0.0236 | (B) TP53 wild in GC |
| SLC25A38 | 3p22.1     | 9.18  | 9.3   | 0.47 | 0.41 | -0.13 | 4.64E-03 | 0.0238 | (B) TP53 wild in GC |
| PDE8B    | 5q13.3     | 4.73  | 5.17  | 1.49 | 1.63 | -0.44 | 4.66E-03 | 0.0239 | (B) TP53 wild in GC |
| IFFO1    | 12p13.31   | 6.78  | 7.05  | 0.9  | 1.02 | -0.27 | 4.67E-03 | 0.0239 | (B) TP53 wild in GC |
| GPR183   | 13q32.3    | 7.81  | 8.16  | 1.21 | 1.31 | -0.35 | 4.67E-03 | 0.0239 | (B) TP53 wild in GC |
| SNHG29   | 17p11.2    | 11.6  | 11.82 | 0.79 | 0.81 | -0.23 | 4.72E-03 | 0.0241 | (B) TP53 wild in GC |
| HTR2B    | 2q37.1     | 4.51  | 5.01  | 1.62 | 1.91 | -0.49 | 4.74E-03 | 0.0241 | (B) TP53 wild in GC |
| CNIH1    | 14q22.2    | 10.64 | 10.78 | 0.49 | 0.49 | -0.14 | 4.75E-03 | 0.0242 | (B) TP53 wild in GC |
| RAPGEF1  | 9q34.13    | 11.09 | 11.25 | 0.57 | 0.58 | -0.16 | 4.77E-03 | 0.0242 | (B) TP53 wild in GC |

|           |          |       |       |      |      |       |          |        |                     |
|-----------|----------|-------|-------|------|------|-------|----------|--------|---------------------|
| C9ORF85   | 9q21.13  | 7.11  | 7.26  | 0.6  | 0.5  | -0.16 | 4.78E-03 | 0.0243 | (B) TP53 wild in GC |
| POLI      | 18q21.2  | 7.75  | 7.95  | 0.71 | 0.7  | -0.2  | 4.79E-03 | 0.0243 | (B) TP53 wild in GC |
| ESYT2     | 7q36.3   | 11.41 | 11.57 | 0.58 | 0.6  | -0.16 | 4.83E-03 | 0.0245 | (B) TP53 wild in GC |
| FILIP1L   | 3q12.1   | 10.63 | 10.94 | 1    | 1.22 | -0.31 | 4.83E-03 | 0.0245 | (B) TP53 wild in GC |
| ZNF215    | 11p15.4  | 4.76  | 5.26  | 1.89 | 1.63 | -0.5  | 4.84E-03 | 0.0245 | (B) TP53 wild in GC |
| APOL3     | 22q12.3  | 8.8   | 9.13  | 1.11 | 1.23 | -0.33 | 4.85E-03 | 0.0245 | (B) TP53 wild in GC |
| AASDH     | 4q12     | 7.5   | 7.64  | 0.53 | 0.49 | -0.14 | 4.85E-03 | 0.0245 | (B) TP53 wild in GC |
| GFI1      | 1p22.1   | 5.59  | 5.96  | 1.38 | 1.22 | -0.37 | 4.87E-03 | 0.0246 | (B) TP53 wild in GC |
| RBM3      | Xp11.23  | 11.31 | 11.48 | 0.61 | 0.53 | -0.16 | 4.87E-03 | 0.0246 | (B) TP53 wild in GC |
| SNHG8     | 4q26     | 8.64  | 8.85  | 0.74 | 0.76 | -0.21 | 4.88E-03 | 0.0246 | (B) TP53 wild in GC |
| C1R       | 12p13.31 | 11.65 | 12.01 | 1.2  | 1.33 | -0.35 | 4.89E-03 | 0.0246 | (B) TP53 wild in GC |
| FRS2      | 12q15    | 9.75  | 9.93  | 0.59 | 0.75 | -0.19 | 4.89E-03 | 0.0246 | (B) TP53 wild in GC |
| ZNF575    | 19q13.31 | 5.82  | 6.01  | 0.7  | 0.71 | -0.2  | 4.90E-03 | 0.0247 | (B) TP53 wild in GC |
| CD27      | 12p13.31 | 6.76  | 7.25  | 1.77 | 1.68 | -0.49 | 4.90E-03 | 0.0247 | (B) TP53 wild in GC |
| TNFAIP8L2 | 1q21.3   | 5.79  | 6.1   | 1.09 | 1.13 | -0.31 | 4.93E-03 | 0.0248 | (B) TP53 wild in GC |
| TVP23C    | 17p12    | 8.29  | 8.48  | 0.7  | 0.68 | -0.19 | 4.94E-03 | 0.0248 | (B) TP53 wild in GC |



|         |            |       |       |      |      |       |          |        |                     |
|---------|------------|-------|-------|------|------|-------|----------|--------|---------------------|
| NEK9    | 14q24.3    | 10.13 | 10.27 | 0.53 | 0.52 | -0.15 | 4.95E-03 | 0.0249 | (B) TP53 wild in GC |
| CD180   | 5q12.3     | 6.49  | 6.92  | 1.53 | 1.55 | -0.43 | 4.97E-03 | 0.0249 | (B) TP53 wild in GC |
| CLINT1  | 5q33.3     | 11.47 | 11.65 | 0.69 | 0.61 | -0.18 | 4.97E-03 | 0.0249 | (B) TP53 wild in GC |
| NFIB    | 9p23-p22.3 | 10.75 | 11.04 | 1.02 | 1.05 | -0.29 | 5.00E-03 | 0.025  | (B) TP53 wild in GC |
| RWDD2B  | 21q21.3    | 7.99  | 8.17  | 0.61 | 0.68 | -0.18 | 5.02E-03 | 0.0251 | (B) TP53 wild in GC |
| CPEB2   | 4p15.32    | 8.78  | 8.97  | 0.67 | 0.71 | -0.19 | 5.03E-03 | 0.0251 | (B) TP53 wild in GC |
| RCN1    | 11p13      | 11.22 | 11.45 | 0.83 | 0.79 | -0.23 | 5.05E-03 | 0.0252 | (B) TP53 wild in GC |
| BORCS7  | 10q24.32   | 8.71  | 8.87  | 0.59 | 0.55 | -0.16 | 5.06E-03 | 0.0253 | (B) TP53 wild in GC |
| IKZF2   | 2q34       | 7.27  | 7.6   | 1.2  | 1.16 | -0.33 | 5.08E-03 | 0.0253 | (B) TP53 wild in GC |
| PLGRKT  | 9p24.1     | 7.95  | 8.17  | 0.76 | 0.83 | -0.22 | 5.08E-03 | 0.0253 | (B) TP53 wild in GC |
| LTA     | 6p21.33    | 3.63  | 4.07  | 1.55 | 1.57 | -0.44 | 5.09E-03 | 0.0254 | (B) TP53 wild in GC |
| WDR11   | 10q26.12   | 9.95  | 10.1  | 0.56 | 0.52 | -0.15 | 5.12E-03 | 0.0255 | (B) TP53 wild in GC |
| HMG5    | Xq21.1     | 6.94  | 7.35  | 1.55 | 1.43 | -0.42 | 5.16E-03 | 0.0256 | (B) TP53 wild in GC |
| RPS6KB1 | 17q23.1    | 9.41  | 9.54  | 0.47 | 0.45 | -0.13 | 5.19E-03 | 0.0257 | (B) TP53 wild in GC |
| PIK3C3  | 18q12.3    | 8.64  | 8.8   | 0.61 | 0.5  | -0.16 | 5.19E-03 | 0.0257 | (B) TP53 wild in GC |
| METTL7A | 12q13.12   | 9.7   | 10.04 | 1.16 | 1.29 | -0.34 | 5.22E-03 | 0.0258 | (B) TP53 wild in GC |

|          |          |       |       |      |      |       |          |        |                     |
|----------|----------|-------|-------|------|------|-------|----------|--------|---------------------|
| TPM1     | 15q22.2  | 12.14 | 12.43 | 0.95 | 1.17 | -0.29 | 5.26E-03 | 0.026  | (B) TP53 wild in GC |
| DMAC1    | 9p24.1   | 9.15  | 9.34  | 0.69 | 0.64 | -0.19 | 5.26E-03 | 0.026  | (B) TP53 wild in GC |
| LRP10    | 14q11.2  | 12.64 | 12.84 | 0.73 | 0.68 | -0.2  | 5.26E-03 | 0.026  | (B) TP53 wild in GC |
| KIAA0825 | 5q15     | 4.75  | 5     | 0.84 | 0.92 | -0.24 | 5.28E-03 | 0.026  | (B) TP53 wild in GC |
| PTPRM    | 18p11.23 | 9.15  | 9.42  | 0.88 | 1.1  | -0.27 | 5.28E-03 | 0.026  | (B) TP53 wild in GC |
| MCCC2    | 5q13.2   | 11.09 | 11.25 | 0.57 | 0.57 | -0.16 | 5.28E-03 | 0.026  | (B) TP53 wild in GC |
| CD52     | 1p36.11  | 8.21  | 8.63  | 1.39 | 1.64 | -0.42 | 5.30E-03 | 0.0261 | (B) TP53 wild in GC |
| ZNF540   | 19q13.12 | 4.22  | 4.56  | 1.19 | 1.26 | -0.34 | 5.30E-03 | 0.0261 | (B) TP53 wild in GC |
| HNRNPA1L | 13q14.3  | 10.47 | 10.62 | 0.55 | 0.51 | -0.15 | 5.31E-03 | 0.0261 | (B) TP53 wild in GC |
| SMAD4    | 18q21.2  | 10.23 | 10.42 | 0.73 | 0.66 | -0.19 | 5.34E-03 | 0.0262 | (B) TP53 wild in GC |
| MXD4     | 4p16.3   | 10.19 | 10.37 | 0.64 | 0.66 | -0.18 | 5.38E-03 | 0.0264 | (B) TP53 wild in GC |
| CARF     | 2q33.2   | 6.67  | 6.9   | 0.83 | 0.87 | -0.24 | 5.40E-03 | 0.0265 | (B) TP53 wild in GC |
| ZNF425   | 7q36.1   | 5.06  | 5.34  | 1.03 | 0.93 | -0.27 | 5.46E-03 | 0.0267 | (B) TP53 wild in GC |
| C3ORF62  | 3p21.31  | 6.73  | 6.92  | 0.72 | 0.65 | -0.19 | 5.46E-03 | 0.0267 | (B) TP53 wild in GC |
| GPC4     | Xq26.2   | 9.31  | 9.62  | 1.16 | 1.12 | -0.32 | 5.50E-03 | 0.0269 | (B) TP53 wild in GC |
| DDIT4    | 10q22.1  | 10.6  | 10.88 | 1    | 1.03 | -0.28 | 5.52E-03 | 0.027  | (B) TP53 wild in GC |

|          |          |       |       |      |      |       |          |        |                     |
|----------|----------|-------|-------|------|------|-------|----------|--------|---------------------|
| FEZ2     | 2p22.2   | 9.14  | 9.29  | 0.5  | 0.63 | -0.15 | 5.52E-03 | 0.027  | (B) TP53 wild in GC |
| RNF38    | 9p13.2   | 9.97  | 10.14 | 0.62 | 0.65 | -0.18 | 5.53E-03 | 0.027  | (B) TP53 wild in GC |
| YWHAH    | 22q12.3  | 11.89 | 12.02 | 0.49 | 0.46 | -0.13 | 5.53E-03 | 0.027  | (B) TP53 wild in GC |
| PPP3CC   | 8p21.3   | 7.66  | 7.87  | 0.83 | 0.73 | -0.22 | 5.57E-03 | 0.0271 | (B) TP53 wild in GC |
| MS4A4A   | 11q12.2  | 7.13  | 7.53  | 1.45 | 1.41 | -0.4  | 5.57E-03 | 0.0271 | (B) TP53 wild in GC |
| TRIM13   | 13q14.2  | 9.45  | 9.59  | 0.54 | 0.47 | -0.14 | 5.59E-03 | 0.0272 | (B) TP53 wild in GC |
| TPT1     | 13q14.13 | 15.2  | 15.37 | 0.63 | 0.6  | -0.17 | 5.63E-03 | 0.0273 | (B) TP53 wild in GC |
| KITLG    | 12q21.32 | 10.01 | 10.29 | 1.01 | 1.05 | -0.28 | 5.66E-03 | 0.0274 | (B) TP53 wild in GC |
| HLA-DQA1 | 6p21.32  | 10.07 | 10.57 | 1.89 | 1.71 | -0.5  | 5.67E-03 | 0.0275 | (B) TP53 wild in GC |
| SEPTIN1  | 16p11.2  | 7.14  | 7.49  | 1.2  | 1.32 | -0.35 | 5.69E-03 | 0.0275 | (B) TP53 wild in GC |
| EIF3F    | 11p15.4  | 10.86 | 10.99 | 0.45 | 0.46 | -0.12 | 5.69E-03 | 0.0275 | (B) TP53 wild in GC |
| RSBN1    | 1p13.2   | 9.24  | 9.36  | 0.44 | 0.44 | -0.12 | 5.70E-03 | 0.0276 | (B) TP53 wild in GC |
| SNX1     | 15q22.31 | 10.73 | 10.84 | 0.39 | 0.43 | -0.11 | 5.70E-03 | 0.0276 | (B) TP53 wild in GC |
| WDFY4    | 10q11.23 | 7.33  | 7.84  | 1.84 | 1.87 | -0.51 | 5.73E-03 | 0.0277 | (B) TP53 wild in GC |
| RASGRP4  | 19q13.2  | 4.92  | 5.28  | 1.23 | 1.36 | -0.35 | 5.74E-03 | 0.0277 | (B) TP53 wild in GC |
| ACADSB   | 10q26.13 | 8.94  | 9.15  | 0.74 | 0.77 | -0.21 | 5.74E-03 | 0.0277 | (B) TP53 wild in GC |

|        |          |       |       |      |      |       |          |        |                     |
|--------|----------|-------|-------|------|------|-------|----------|--------|---------------------|
| BBS7   | 4q27     | 7.81  | 7.95  | 0.5  | 0.45 | -0.13 | 5.79E-03 | 0.0279 | (B) TP53 wild in GC |
| REST   | 4q12     | 9.21  | 9.34  | 0.49 | 0.47 | -0.13 | 5.81E-03 | 0.028  | (B) TP53 wild in GC |
| GPRC5A | 12p13.1  | 12.29 | 12.73 | 1.67 | 1.52 | -0.44 | 5.85E-03 | 0.0282 | (B) TP53 wild in GC |
| ITGA1  | 5q11.2   | 10.24 | 10.53 | 1.01 | 1.09 | -0.29 | 5.87E-03 | 0.0282 | (B) TP53 wild in GC |
| IGSF6  | 16p12.2  | 6.91  | 7.26  | 1.26 | 1.35 | -0.36 | 5.87E-03 | 0.0282 | (B) TP53 wild in GC |
| LY86   | 6p25.1   | 6.27  | 6.65  | 1.3  | 1.49 | -0.38 | 5.92E-03 | 0.0284 | (B) TP53 wild in GC |
| INTS6L | Xq26.3   | 6.84  | 7.13  | 1.1  | 1.01 | -0.29 | 5.92E-03 | 0.0284 | (B) TP53 wild in GC |
| DPT    | 1q24.2   | 5.68  | 6.3   | 2.16 | 2.4  | -0.62 | 5.96E-03 | 0.0286 | (B) TP53 wild in GC |
| GNS    | 12q14.3  | 11.98 | 12.14 | 0.59 | 0.64 | -0.17 | 5.96E-03 | 0.0286 | (B) TP53 wild in GC |
| AFF3   | 2q11.2   | 5.15  | 5.72  | 1.95 | 2.19 | -0.56 | 5.96E-03 | 0.0286 | (B) TP53 wild in GC |
| SUCLG2 | 3p14.1   | 10.17 | 10.33 | 0.64 | 0.56 | -0.17 | 6.02E-03 | 0.0287 | (B) TP53 wild in GC |
| RFX3   | 9p24.2   | 5.84  | 6.13  | 1.06 | 1    | -0.28 | 6.02E-03 | 0.0288 | (B) TP53 wild in GC |
| XAF1   | 17p13.1  | 9.99  | 10.31 | 1.21 | 1.13 | -0.32 | 6.04E-03 | 0.0288 | (B) TP53 wild in GC |
| ATP8A1 | 4p13     | 8.79  | 9.17  | 1.49 | 1.26 | -0.38 | 6.12E-03 | 0.0291 | (B) TP53 wild in GC |
| CXXC1  | 18q21.1  | 9.26  | 9.39  | 0.49 | 0.49 | -0.13 | 6.13E-03 | 0.0292 | (B) TP53 wild in GC |
| IPO8   | 12p11.21 | 10.33 | 10.47 | 0.53 | 0.5  | -0.14 | 6.14E-03 | 0.0292 | (B) TP53 wild in GC |

|         |            |       |       |      |      |       |          |        |                     |
|---------|------------|-------|-------|------|------|-------|----------|--------|---------------------|
| SMAP2   | 1p34.2     | 9.92  | 10.11 | 0.69 | 0.7  | -0.19 | 6.14E-03 | 0.0292 | (B) TP53 wild in GC |
| TSTD2   | 9q22.33    | 8.65  | 8.79  | 0.52 | 0.52 | -0.14 | 6.14E-03 | 0.0292 | (B) TP53 wild in GC |
| PABPC4L | 4q28.3     | 4.54  | 4.88  | 1.11 | 1.41 | -0.34 | 6.17E-03 | 0.0293 | (B) TP53 wild in GC |
| FBXL3   | 13q22.3    | 10.16 | 10.29 | 0.46 | 0.45 | -0.13 | 6.18E-03 | 0.0293 | (B) TP53 wild in GC |
| DZIP3   | 3q13.13    | 8.02  | 8.23  | 0.75 | 0.77 | -0.21 | 6.18E-03 | 0.0293 | (B) TP53 wild in GC |
| N4BP1   | 16q12.1    | 10.29 | 10.41 | 0.44 | 0.41 | -0.12 | 6.20E-03 | 0.0294 | (B) TP53 wild in GC |
| ARSK    | 5q15       | 6.8   | 6.95  | 0.59 | 0.52 | -0.15 | 6.21E-03 | 0.0294 | (B) TP53 wild in GC |
| RTRAF   | 14q22.1    | 10.82 | 10.97 | 0.56 | 0.48 | -0.14 | 6.22E-03 | 0.0295 | (B) TP53 wild in GC |
| TM2D2   | 8p11.22    | 9.4   | 9.55  | 0.58 | 0.51 | -0.15 | 6.26E-03 | 0.0296 | (B) TP53 wild in GC |
| SH2B3   | 12q24.12   | 10.13 | 10.31 | 0.66 | 0.66 | -0.18 | 6.29E-03 | 0.0297 | (B) TP53 wild in GC |
| SRA1    | 5q31.3     | 9.12  | 9.27  | 0.55 | 0.51 | -0.14 | 6.30E-03 | 0.0297 | (B) TP53 wild in GC |
| SUFU    | 10q24.32   | 8.81  | 8.95  | 0.53 | 0.52 | -0.14 | 6.30E-03 | 0.0297 | (B) TP53 wild in GC |
| FNDC3A  | 13q14.2    | 11.05 | 11.22 | 0.66 | 0.56 | -0.17 | 6.30E-03 | 0.0297 | (B) TP53 wild in GC |
| SYNE2   | 14q23.2    | 11.73 | 11.96 | 0.79 | 0.96 | -0.24 | 6.30E-03 | 0.0297 | (B) TP53 wild in GC |
| ZNF490  | 19p13.2-p1 | 7.69  | 7.85  | 0.57 | 0.54 | -0.15 | 6.37E-03 | 0.03   | (B) TP53 wild in GC |
| CD163L1 | 12p13.31   | 5.72  | 6.18  | 1.72 | 1.61 | -0.46 | 6.38E-03 | 0.03   | (B) TP53 wild in GC |

|          |           |       |       |      |      |       |          |        |                     |
|----------|-----------|-------|-------|------|------|-------|----------|--------|---------------------|
| ABCA1    | 9q31.1    | 9.72  | 9.98  | 0.96 | 1.02 | -0.27 | 6.38E-03 | 0.03   | (B) TP53 wild in GC |
| DHRS7B   | 17p11.2   | 8.39  | 8.56  | 0.67 | 0.57 | -0.17 | 6.39E-03 | 0.0301 | (B) TP53 wild in GC |
| DAPP1    | 4q23      | 6.96  | 7.35  | 1.43 | 1.41 | -0.39 | 6.40E-03 | 0.0301 | (B) TP53 wild in GC |
| NBAS     | 2p24.3    | 9.83  | 9.97  | 0.52 | 0.55 | -0.14 | 6.41E-03 | 0.0301 | (B) TP53 wild in GC |
| FZD4     | 11q14.2   | 9.17  | 9.41  | 0.85 | 0.93 | -0.24 | 6.41E-03 | 0.0301 | (B) TP53 wild in GC |
| SIGLEC10 | 19q13.41  | 7.37  | 7.77  | 1.47 | 1.47 | -0.4  | 6.42E-03 | 0.0301 | (B) TP53 wild in GC |
| ENC1     | 5q13.3    | 11.24 | 11.49 | 0.88 | 1    | -0.25 | 6.42E-03 | 0.0301 | (B) TP53 wild in GC |
| ZNF564   | 19p13.2   | 7.71  | 7.84  | 0.51 | 0.42 | -0.13 | 6.42E-03 | 0.0301 | (B) TP53 wild in GC |
| SLAMF7   | 1q23.3    | 8.28  | 8.72  | 1.54 | 1.65 | -0.43 | 6.46E-03 | 0.0303 | (B) TP53 wild in GC |
| SIRT1    | 10q21.3   | 9.04  | 9.18  | 0.54 | 0.49 | -0.14 | 6.47E-03 | 0.0303 | (B) TP53 wild in GC |
| ZNF366   | 5q13.2 5q | 5     | 5.35  | 1.2  | 1.36 | -0.34 | 6.47E-03 | 0.0303 | (B) TP53 wild in GC |
| ST3GAL5  | 2p11.2    | 6.83  | 7.1   | 0.99 | 0.99 | -0.27 | 6.53E-03 | 0.0304 | (B) TP53 wild in GC |
| TMEM245  | 9q31.3    | 10.98 | 11.16 | 0.58 | 0.79 | -0.18 | 6.53E-03 | 0.0304 | (B) TP53 wild in GC |
| MOB3C    | 1p33      | 8.37  | 8.51  | 0.57 | 0.49 | -0.15 | 6.54E-03 | 0.0305 | (B) TP53 wild in GC |
| BTAFF1   | 10q23.32  | 9.74  | 9.92  | 0.64 | 0.69 | -0.18 | 6.55E-03 | 0.0305 | (B) TP53 wild in GC |
| ELAC1    | 18q21.2   | 6.37  | 6.56  | 0.73 | 0.67 | -0.19 | 6.59E-03 | 0.0307 | (B) TP53 wild in GC |

|        |            |       |       |      |      |       |          |        |                     |
|--------|------------|-------|-------|------|------|-------|----------|--------|---------------------|
| NFIC   | 19p13.3    | 10.47 | 10.7  | 0.8  | 0.93 | -0.23 | 6.60E-03 | 0.0307 | (B) TP53 wild in GC |
| JMY    | 5q14.1     | 9.11  | 9.31  | 0.64 | 0.85 | -0.2  | 6.62E-03 | 0.0308 | (B) TP53 wild in GC |
| UGCG   | 9q31.3     | 8.4   | 8.61  | 0.75 | 0.86 | -0.22 | 6.62E-03 | 0.0308 | (B) TP53 wild in GC |
| MAP3K1 | 5q11.2     | 9.67  | 9.85  | 0.63 | 0.73 | -0.18 | 6.63E-03 | 0.0308 | (B) TP53 wild in GC |
| TEC    | 19q13.2    | 5.76  | 5.98  | 0.86 | 0.76 | -0.22 | 6.64E-03 | 0.0308 | (B) TP53 wild in GC |
| MEF2C  | 5q14.3     | 8.85  | 9.16  | 1.05 | 1.21 | -0.3  | 6.66E-03 | 0.0309 | (B) TP53 wild in GC |
| TRIM21 | 11p15.4    | 8.89  | 9.06  | 0.65 | 0.63 | -0.17 | 6.66E-03 | 0.0309 | (B) TP53 wild in GC |
| SGCD   | 5q33.2-q33 | 7.95  | 8.37  | 1.47 | 1.69 | -0.43 | 6.66E-03 | 0.0309 | (B) TP53 wild in GC |
| EPM2A  | 6q24.3     | 6.41  | 6.66  | 0.87 | 0.99 | -0.25 | 6.68E-03 | 0.0309 | (B) TP53 wild in GC |
| SETD7  | 4q31.1     | 10.77 | 10.99 | 0.8  | 0.84 | -0.22 | 6.69E-03 | 0.031  | (B) TP53 wild in GC |
| ZEB1   | 10p11.22   | 9.59  | 9.91  | 1.08 | 1.32 | -0.32 | 6.70E-03 | 0.031  | (B) TP53 wild in GC |
| C3     | 19p13.3    | 12.84 | 13.33 | 1.73 | 1.93 | -0.49 | 6.73E-03 | 0.0311 | (B) TP53 wild in GC |
| LMBRD1 | 6q13       | 10.02 | 10.15 | 0.48 | 0.48 | -0.13 | 6.77E-03 | 0.0312 | (B) TP53 wild in GC |
| ZBTB4  | 17p13.1    | 10.74 | 10.94 | 0.68 | 0.79 | -0.2  | 6.77E-03 | 0.0312 | (B) TP53 wild in GC |
| IRAK3  | 12q14.3    | 8.13  | 8.52  | 1.34 | 1.56 | -0.39 | 6.78E-03 | 0.0313 | (B) TP53 wild in GC |
| CD14   | 5q31.3     | 9.98  | 10.27 | 1.05 | 1.11 | -0.29 | 6.79E-03 | 0.0313 | (B) TP53 wild in GC |

|          |          |       |       |      |      |       |          |        |                     |
|----------|----------|-------|-------|------|------|-------|----------|--------|---------------------|
| LRIG1    | 3p14.1   | 10.74 | 11.01 | 0.92 | 1.1  | -0.27 | 6.81E-03 | 0.0314 | (B) TP53 wild in GC |
| APP      | 21q21.3  | 13.78 | 13.94 | 0.61 | 0.51 | -0.15 | 6.83E-03 | 0.0314 | (B) TP53 wild in GC |
| POPDC2   | 3q13.33  | 5.16  | 5.63  | 1.57 | 1.92 | -0.47 | 6.83E-03 | 0.0314 | (B) TP53 wild in GC |
| XPA      | 9q22.33  | 7.8   | 7.94  | 0.53 | 0.53 | -0.14 | 6.83E-03 | 0.0314 | (B) TP53 wild in GC |
| CARD16   | 11q22.3  | 6.72  | 7.03  | 1.18 | 1.09 | -0.31 | 6.85E-03 | 0.0315 | (B) TP53 wild in GC |
| STK10    | 5q35.1   | 9.72  | 9.9   | 0.65 | 0.66 | -0.18 | 6.86E-03 | 0.0315 | (B) TP53 wild in GC |
| TOR1AIP1 | 1q25.2   | 10.45 | 10.6  | 0.47 | 0.6  | -0.14 | 6.89E-03 | 0.0316 | (B) TP53 wild in GC |
| ASB7     | 15q26.3  | 8.74  | 8.87  | 0.48 | 0.47 | -0.13 | 6.89E-03 | 0.0316 | (B) TP53 wild in GC |
| HECTD2   | 10q23.32 | 7.21  | 7.49  | 1    | 1.08 | -0.28 | 6.95E-03 | 0.0318 | (B) TP53 wild in GC |
| YPEL5    | 2p23.1   | 10.12 | 10.26 | 0.49 | 0.56 | -0.14 | 6.96E-03 | 0.0318 | (B) TP53 wild in GC |
| SLC35A4  | 5q31.3   | 11.27 | 11.39 | 0.43 | 0.41 | -0.11 | 6.96E-03 | 0.0318 | (B) TP53 wild in GC |
| TAB2     | 6q25.1   | 10.91 | 11.03 | 0.43 | 0.47 | -0.12 | 6.97E-03 | 0.0319 | (B) TP53 wild in GC |
| TWSG1    | 18p11.22 | 10.21 | 10.42 | 0.73 | 0.78 | -0.2  | 6.99E-03 | 0.0319 | (B) TP53 wild in GC |
| PRKD3    | 2p22.2   | 9.36  | 9.59  | 0.87 | 0.88 | -0.24 | 7.06E-03 | 0.0322 | (B) TP53 wild in GC |
| CXCL13   | 4q21.1   | 7.54  | 8.19  | 2.39 | 2.42 | -0.65 | 7.08E-03 | 0.0323 | (B) TP53 wild in GC |
| MORC4    | Xq22.3   | 9.23  | 9.46  | 0.85 | 0.87 | -0.23 | 7.09E-03 | 0.0323 | (B) TP53 wild in GC |



|          |          |       |       |      |      |       |          |        |                     |
|----------|----------|-------|-------|------|------|-------|----------|--------|---------------------|
| LAG3     | 12p13.31 | 6.63  | 7.05  | 1.56 | 1.56 | -0.42 | 7.13E-03 | 0.0324 | (B) TP53 wild in GC |
| ABO      | 9q34.2   | 6.86  | 7.43  | 2.12 | 2.12 | -0.57 | 7.15E-03 | 0.0324 | (B) TP53 wild in GC |
| EIF4G2   | 11p15.4  | 14.17 | 14.27 | 0.37 | 0.38 | -0.1  | 7.15E-03 | 0.0324 | (B) TP53 wild in GC |
| UBA7     | 3p21.31  | 9.56  | 9.8   | 0.93 | 0.86 | -0.24 | 7.15E-03 | 0.0324 | (B) TP53 wild in GC |
| KDM5A    | 12p13.33 | 10.51 | 10.63 | 0.46 | 0.48 | -0.13 | 7.19E-03 | 0.0326 | (B) TP53 wild in GC |
| LOC90784 | 2p11.2   | 8.08  | 8.26  | 0.63 | 0.7  | -0.18 | 7.23E-03 | 0.0327 | (B) TP53 wild in GC |
| APOBEC3C | 22q13.1  | 8.34  | 8.63  | 1.04 | 1.09 | -0.28 | 7.23E-03 | 0.0327 | (B) TP53 wild in GC |
| FBXO10   | 9p13.2   | 7.35  | 7.55  | 0.74 | 0.71 | -0.19 | 7.24E-03 | 0.0327 | (B) TP53 wild in GC |
| PCGF6    | 10q24.33 | 7.11  | 7.26  | 0.56 | 0.54 | -0.15 | 7.24E-03 | 0.0327 | (B) TP53 wild in GC |
| SIT1     | 9p13.3   | 5.56  | 5.98  | 1.53 | 1.59 | -0.42 | 7.24E-03 | 0.0327 | (B) TP53 wild in GC |
| ST6GALNA | 17q25.1  | 9.03  | 9.63  | 2.5  | 1.92 | -0.61 | 7.24E-03 | 0.0327 | (B) TP53 wild in GC |
| PTGFRN   | 1p13.1   | 11.12 | 11.3  | 0.61 | 0.72 | -0.18 | 7.32E-03 | 0.033  | (B) TP53 wild in GC |
| C1QBP    | 17p13.2  | 10.97 | 11.16 | 0.7  | 0.71 | -0.19 | 7.32E-03 | 0.033  | (B) TP53 wild in GC |
| LRRK2    | 12q12    | 6.65  | 7.09  | 1.52 | 1.79 | -0.44 | 7.33E-03 | 0.033  | (B) TP53 wild in GC |
| NAALADL2 | 3q26.31  | 6.73  | 7.13  | 1.55 | 1.38 | -0.4  | 7.35E-03 | 0.033  | (B) TP53 wild in GC |
| COL6A1   | 21q22.3  | 12.78 | 13.06 | 1.01 | 1.15 | -0.29 | 7.36E-03 | 0.0331 | (B) TP53 wild in GC |

|          |            |       |       |      |      |       |          |        |                     |
|----------|------------|-------|-------|------|------|-------|----------|--------|---------------------|
| ZNF518A  | 10q24.1    | 9.53  | 9.74  | 0.81 | 0.73 | -0.21 | 7.37E-03 | 0.0331 | (B) TP53 wild in GC |
| ANKRD22  | 10q23.31   | 8.82  | 9.2   | 1.41 | 1.43 | -0.38 | 7.39E-03 | 0.0331 | (B) TP53 wild in GC |
| MDFIC    | 7q31.1-q31 | 8.8   | 9.08  | 0.99 | 1.12 | -0.28 | 7.40E-03 | 0.0332 | (B) TP53 wild in GC |
| MSL3     | Xp22.2     | 9.2   | 9.32  | 0.46 | 0.42 | -0.12 | 7.41E-03 | 0.0332 | (B) TP53 wild in GC |
| CRIM1    | 2p22.2     | 10.74 | 10.95 | 0.76 | 0.76 | -0.2  | 7.44E-03 | 0.0333 | (B) TP53 wild in GC |
| LAMA4    | 6q21       | 10.8  | 11.05 | 0.86 | 1.06 | -0.25 | 7.46E-03 | 0.0333 | (B) TP53 wild in GC |
| SH2D3C   | 9q34.11    | 8.06  | 8.31  | 0.89 | 0.96 | -0.25 | 7.46E-03 | 0.0333 | (B) TP53 wild in GC |
| CD81     | 11p15.5    | 12.61 | 12.78 | 0.68 | 0.63 | -0.18 | 7.50E-03 | 0.0335 | (B) TP53 wild in GC |
| C5ORF15  | 5q31.1     | 10.47 | 10.63 | 0.6  | 0.57 | -0.16 | 7.51E-03 | 0.0335 | (B) TP53 wild in GC |
| PLEKHO2  | 15q22.31   | 9.43  | 9.64  | 0.77 | 0.84 | -0.21 | 7.54E-03 | 0.0336 | (B) TP53 wild in GC |
| LTA4H    | 12q23.1    | 10.76 | 10.89 | 0.45 | 0.54 | -0.13 | 7.54E-03 | 0.0336 | (B) TP53 wild in GC |
| PPARGC1B | 5q32       | 6.82  | 7.12  | 1.18 | 1.02 | -0.3  | 7.55E-03 | 0.0337 | (B) TP53 wild in GC |
| DENND6A  | 3p14.3     | 9.1   | 9.22  | 0.45 | 0.47 | -0.12 | 7.56E-03 | 0.0337 | (B) TP53 wild in GC |
| MYO5A    | 15q21.2    | 8.76  | 9.03  | 0.91 | 1.11 | -0.27 | 7.59E-03 | 0.0338 | (B) TP53 wild in GC |
| TTL11    | 9q33.2     | 6.33  | 6.54  | 0.75 | 0.83 | -0.21 | 7.59E-03 | 0.0338 | (B) TP53 wild in GC |
| CNOT4    | 7q33       | 9.08  | 9.17  | 0.34 | 0.32 | -0.09 | 7.59E-03 | 0.0338 | (B) TP53 wild in GC |

|         |            |       |       |      |      |       |          |        |                     |
|---------|------------|-------|-------|------|------|-------|----------|--------|---------------------|
| FLT3LG  | 19q13.33   | 6.56  | 6.82  | 0.94 | 1.02 | -0.26 | 7.60E-03 | 0.0338 | (B) TP53 wild in GC |
| ATG4C   | 1p31.3     | 7.36  | 7.48  | 0.45 | 0.44 | -0.12 | 7.60E-03 | 0.0338 | (B) TP53 wild in GC |
| GTF2H2C | 5q13.2     | 8.12  | 8.29  | 0.64 | 0.65 | -0.17 | 7.63E-03 | 0.0339 | (B) TP53 wild in GC |
| ZNF484  | 9q22.31    | 6.82  | 6.98  | 0.63 | 0.62 | -0.17 | 7.64E-03 | 0.0339 | (B) TP53 wild in GC |
| BACE2   | 21q22.2-q2 | 11.44 | 11.72 | 1.05 | 1.02 | -0.28 | 7.64E-03 | 0.0339 | (B) TP53 wild in GC |
| IQGAP2  | 5q13.3     | 10.4  | 10.77 | 1.43 | 1.3  | -0.37 | 7.65E-03 | 0.0339 | (B) TP53 wild in GC |
| GYPC    | 2q14.3     | 8.21  | 8.54  | 1.14 | 1.38 | -0.33 | 7.67E-03 | 0.034  | (B) TP53 wild in GC |
| HDAC3   | 5q31.3     | 9.37  | 9.47  | 0.41 | 0.39 | -0.11 | 7.68E-03 | 0.034  | (B) TP53 wild in GC |
| FGD2    | 6p21.2     | 7.01  | 7.34  | 1.16 | 1.29 | -0.32 | 7.69E-03 | 0.0341 | (B) TP53 wild in GC |
| RPSAP58 | 19p12      | 12.75 | 12.91 | 0.62 | 0.58 | -0.16 | 7.73E-03 | 0.0342 | (B) TP53 wild in GC |
| CNRIP1  | 2p14       | 7.05  | 7.32  | 0.9  | 1.2  | -0.27 | 7.74E-03 | 0.0342 | (B) TP53 wild in GC |
| RABGAP1 | 9q33.2-q33 | 10.06 | 10.22 | 0.55 | 0.6  | -0.15 | 7.76E-03 | 0.0343 | (B) TP53 wild in GC |
| NMUR1   | 2q37.1     | 4.48  | 4.87  | 1.39 | 1.6  | -0.39 | 7.77E-03 | 0.0343 | (B) TP53 wild in GC |
| CFD     | 19p13.3    | 8.31  | 8.71  | 1.46 | 1.61 | -0.4  | 7.78E-03 | 0.0343 | (B) TP53 wild in GC |
| CORO1A  | 16p11.2    | 9.53  | 9.85  | 1.17 | 1.23 | -0.32 | 7.78E-03 | 0.0343 | (B) TP53 wild in GC |
| SENP5   | 3q29       | 9.37  | 9.5   | 0.48 | 0.47 | -0.13 | 7.83E-03 | 0.0345 | (B) TP53 wild in GC |

|          |            |       |       |      |      |       |          |        |                     |
|----------|------------|-------|-------|------|------|-------|----------|--------|---------------------|
| ICE2     | 15q22.2    | 9.58  | 9.7   | 0.46 | 0.47 | -0.12 | 7.85E-03 | 0.0346 | (B) TP53 wild in GC |
| 8-Mar    | 10q11.21-q | 8.1   | 8.32  | 0.83 | 0.8  | -0.22 | 7.91E-03 | 0.0348 | (B) TP53 wild in GC |
| FCMR     | 1q32.1     | 7.38  | 7.76  | 1.34 | 1.57 | -0.38 | 7.96E-03 | 0.035  | (B) TP53 wild in GC |
| LAMB2    | 3p21.31    | 11.67 | 11.9  | 0.83 | 0.86 | -0.22 | 7.99E-03 | 0.0351 | (B) TP53 wild in GC |
| RC3H2    | 9q33.2     | 9.12  | 9.29  | 0.67 | 0.64 | -0.17 | 8.01E-03 | 0.0352 | (B) TP53 wild in GC |
| KIF2A    | 5q12.1     | 9.21  | 9.38  | 0.65 | 0.61 | -0.17 | 8.01E-03 | 0.0352 | (B) TP53 wild in GC |
| SRGAP3   | 3p25.3     | 6.4   | 6.71  | 1.21 | 1.16 | -0.31 | 8.03E-03 | 0.0352 | (B) TP53 wild in GC |
| TMX1     | 14q22.1    | 10.18 | 10.31 | 0.5  | 0.45 | -0.13 | 8.09E-03 | 0.0354 | (B) TP53 wild in GC |
| SPCS3    | 4q34.2     | 11.37 | 11.5  | 0.46 | 0.49 | -0.13 | 8.09E-03 | 0.0354 | (B) TP53 wild in GC |
| ISCA1    | 9q21.33    | 8.98  | 9.11  | 0.48 | 0.51 | -0.13 | 8.09E-03 | 0.0354 | (B) TP53 wild in GC |
| ZNF266   | 19p13.2    | 8.74  | 8.92  | 0.69 | 0.69 | -0.18 | 8.11E-03 | 0.0355 | (B) TP53 wild in GC |
| NACC2    | 9q34.3     | 7.24  | 7.48  | 0.85 | 0.97 | -0.24 | 8.14E-03 | 0.0356 | (B) TP53 wild in GC |
| MORC3    | 21q22.12   | 9.45  | 9.59  | 0.49 | 0.53 | -0.13 | 8.16E-03 | 0.0357 | (B) TP53 wild in GC |
| SRGN     | 10q22.1    | 10.58 | 10.89 | 1.11 | 1.25 | -0.31 | 8.17E-03 | 0.0357 | (B) TP53 wild in GC |
| ADAMTSL1 | 9p22.2-p22 | 6.21  | 6.6   | 1.39 | 1.61 | -0.39 | 8.19E-03 | 0.0357 | (B) TP53 wild in GC |
| MRNIP    | 5q35.3     | 5.94  | 6.14  | 0.74 | 0.78 | -0.2  | 8.20E-03 | 0.0358 | (B) TP53 wild in GC |

|          |            |       |       |      |      |       |          |        |                     |
|----------|------------|-------|-------|------|------|-------|----------|--------|---------------------|
| DAAM1    | 14q23.1    | 8.91  | 9.08  | 0.61 | 0.67 | -0.17 | 8.22E-03 | 0.0358 | (B) TP53 wild in GC |
| FAM102B  | 1p13.3     | 10.01 | 10.2  | 0.75 | 0.69 | -0.19 | 8.24E-03 | 0.0359 | (B) TP53 wild in GC |
| ALCAM    | 3q13.11    | 9.79  | 10.09 | 1.12 | 1.16 | -0.3  | 8.24E-03 | 0.0359 | (B) TP53 wild in GC |
| PELO     | 5q11.2     | 8.89  | 9.01  | 0.45 | 0.47 | -0.12 | 8.26E-03 | 0.036  | (B) TP53 wild in GC |
| RIPK1    | 6p25.2     | 9.89  | 9.99  | 0.38 | 0.36 | -0.1  | 8.28E-03 | 0.036  | (B) TP53 wild in GC |
| USP46    | 4q12       | 8.38  | 8.52  | 0.58 | 0.51 | -0.14 | 8.35E-03 | 0.0362 | (B) TP53 wild in GC |
| DOCK4    | 7q31.1     | 8.14  | 8.38  | 0.88 | 0.95 | -0.24 | 8.37E-03 | 0.0363 | (B) TP53 wild in GC |
| DOCK5    | 8p21.2     | 9.66  | 9.9   | 0.93 | 0.91 | -0.24 | 8.43E-03 | 0.0365 | (B) TP53 wild in GC |
| ZNF20    | 19p13.2    | 6.49  | 6.64  | 0.57 | 0.53 | -0.15 | 8.44E-03 | 0.0366 | (B) TP53 wild in GC |
| LYRM7    | 5q23.3-q31 | 8.55  | 8.71  | 0.58 | 0.61 | -0.16 | 8.46E-03 | 0.0366 | (B) TP53 wild in GC |
| CCR7     | 17q21.2    | 6.11  | 6.59  | 1.7  | 1.98 | -0.48 | 8.46E-03 | 0.0366 | (B) TP53 wild in GC |
| TGFBR2   | 3p24.1     | 11.62 | 11.85 | 0.77 | 0.97 | -0.23 | 8.48E-03 | 0.0366 | (B) TP53 wild in GC |
| PHC3     | 3q26.2     | 10.75 | 10.91 | 0.63 | 0.57 | -0.16 | 8.48E-03 | 0.0367 | (B) TP53 wild in GC |
| ZNF565   | 19q13.12   | 6.14  | 6.29  | 0.62 | 0.53 | -0.15 | 8.50E-03 | 0.0367 | (B) TP53 wild in GC |
| DPY19L1  | 7p14.2     | 10.06 | 10.26 | 0.73 | 0.75 | -0.19 | 8.51E-03 | 0.0367 | (B) TP53 wild in GC |
| ARHGEF28 | 5q13.2     | 8.35  | 8.61  | 1.03 | 0.94 | -0.26 | 8.55E-03 | 0.0369 | (B) TP53 wild in GC |

|         |          |       |       |      |      |       |          |        |                     |
|---------|----------|-------|-------|------|------|-------|----------|--------|---------------------|
| SMAD1   | 4q31.21  | 9.12  | 9.25  | 0.44 | 0.5  | -0.12 | 8.56E-03 | 0.0369 | (B) TP53 wild in GC |
| IFT27   | 22q12.3  | 7.82  | 8     | 0.72 | 0.67 | -0.18 | 8.56E-03 | 0.0369 | (B) TP53 wild in GC |
| RAB27B  | 18q21.2  | 7.15  | 7.61  | 1.87 | 1.64 | -0.47 | 8.58E-03 | 0.037  | (B) TP53 wild in GC |
| CAMK2D  | 4q26     | 10.06 | 10.22 | 0.62 | 0.6  | -0.16 | 8.64E-03 | 0.0371 | (B) TP53 wild in GC |
| JAK3    | 19p13.11 | 8.7   | 8.99  | 1.04 | 1.18 | -0.29 | 8.66E-03 | 0.0372 | (B) TP53 wild in GC |
| SSH1    | 12q24.11 | 10.32 | 10.46 | 0.51 | 0.56 | -0.14 | 8.67E-03 | 0.0372 | (B) TP53 wild in GC |
| DISC1   | 1q42.2   | 6.83  | 7.07  | 0.9  | 0.92 | -0.24 | 8.69E-03 | 0.0373 | (B) TP53 wild in GC |
| HAVCR2  | 5q33.3   | 7.66  | 7.98  | 1.21 | 1.22 | -0.32 | 8.71E-03 | 0.0374 | (B) TP53 wild in GC |
| ZNF234  | 19q13.31 | 6.98  | 7.17  | 0.83 | 0.64 | -0.2  | 8.72E-03 | 0.0374 | (B) TP53 wild in GC |
| LSP1    | 11p15.5  | 9.83  | 10.13 | 1.09 | 1.21 | -0.3  | 8.73E-03 | 0.0374 | (B) TP53 wild in GC |
| NLRP3   | 1q44     | 5.28  | 5.64  | 1.33 | 1.37 | -0.35 | 8.79E-03 | 0.0376 | (B) TP53 wild in GC |
| SLC24A1 | 15q22.31 | 8.16  | 8.32  | 0.61 | 0.59 | -0.16 | 8.84E-03 | 0.0378 | (B) TP53 wild in GC |
| MLLT3   | 9p21.3   | 8.21  | 8.47  | 0.98 | 0.93 | -0.25 | 8.94E-03 | 0.0381 | (B) TP53 wild in GC |
| HOMEZ   | 14q11.2  | 8.39  | 8.53  | 0.56 | 0.51 | -0.14 | 8.95E-03 | 0.0381 | (B) TP53 wild in GC |
| CXCR3   | Xq13.1   | 6.55  | 6.91  | 1.31 | 1.52 | -0.36 | 8.97E-03 | 0.0382 | (B) TP53 wild in GC |
| CNN2    | 19p13.3  | 11.47 | 11.66 | 0.73 | 0.72 | -0.19 | 8.97E-03 | 0.0382 | (B) TP53 wild in GC |

|           |          |       |       |      |      |       |          |        |                     |
|-----------|----------|-------|-------|------|------|-------|----------|--------|---------------------|
| ADORA3    | 1p13.2   | 5.89  | 6.27  | 1.39 | 1.49 | -0.37 | 9.01E-03 | 0.0384 | (B) TP53 wild in GC |
| ITGAV     | 2q32.1   | 11.57 | 11.77 | 0.78 | 0.78 | -0.2  | 9.04E-03 | 0.0385 | (B) TP53 wild in GC |
| APBB2     | 4p14-p13 | 9.95  | 10.13 | 0.67 | 0.71 | -0.18 | 9.05E-03 | 0.0385 | (B) TP53 wild in GC |
| PDE4C     | 19p13.11 | 5.59  | 6.08  | 1.84 | 1.97 | -0.49 | 9.05E-03 | 0.0385 | (B) TP53 wild in GC |
| LINC02035 | 3q21.1   | 7.48  | 7.68  | 0.73 | 0.83 | -0.2  | 9.07E-03 | 0.0386 | (B) TP53 wild in GC |
| BNIP2     | 15q22.2  | 9.44  | 9.59  | 0.58 | 0.56 | -0.15 | 9.09E-03 | 0.0386 | (B) TP53 wild in GC |
| SGMS1     | 10q11.23 | 9.4   | 9.55  | 0.59 | 0.55 | -0.15 | 9.09E-03 | 0.0386 | (B) TP53 wild in GC |
| RAB33A    | Xq26.1   | 3.51  | 3.8   | 1.13 | 1.12 | -0.29 | 9.11E-03 | 0.0387 | (B) TP53 wild in GC |
| TMEM173   | 5q31.2   | 8.89  | 9.13  | 0.86 | 0.94 | -0.23 | 9.11E-03 | 0.0387 | (B) TP53 wild in GC |
| TCF4      | 18q21.2  | 9.92  | 10.16 | 0.85 | 1.06 | -0.25 | 9.12E-03 | 0.0387 | (B) TP53 wild in GC |
| RPSA      | 3p22.1   | 11.06 | 11.22 | 0.62 | 0.6  | -0.16 | 9.12E-03 | 0.0387 | (B) TP53 wild in GC |
| ETFBKMT   | 12p11.21 | 4.98  | 5.17  | 0.76 | 0.72 | -0.19 | 9.16E-03 | 0.0388 | (B) TP53 wild in GC |
| METTL8    | 2q31.1   | 8.63  | 8.79  | 0.63 | 0.55 | -0.16 | 9.17E-03 | 0.0389 | (B) TP53 wild in GC |
| AFAP1     | 4p16.1   | 10.49 | 10.68 | 0.69 | 0.78 | -0.19 | 9.17E-03 | 0.0389 | (B) TP53 wild in GC |
| ELL2      | 5q15     | 9.46  | 9.67  | 0.8  | 0.85 | -0.21 | 9.21E-03 | 0.039  | (B) TP53 wild in GC |
| HS3ST1    | 4p15.33  | 8.54  | 8.86  | 1.19 | 1.27 | -0.32 | 9.22E-03 | 0.039  | (B) TP53 wild in GC |

|          |          |       |       |      |      |       |          |        |                     |
|----------|----------|-------|-------|------|------|-------|----------|--------|---------------------|
| HDAC4    | 2q37.3   | 9.11  | 9.34  | 0.84 | 0.88 | -0.22 | 9.23E-03 | 0.039  | (B) TP53 wild in GC |
| IFIT5    | 10q23.31 | 8.81  | 8.99  | 0.67 | 0.72 | -0.18 | 9.26E-03 | 0.0391 | (B) TP53 wild in GC |
| SLC25A28 | 10q24.2  | 8.87  | 9.01  | 0.51 | 0.56 | -0.14 | 9.28E-03 | 0.0392 | (B) TP53 wild in GC |
| ATF7     | 12q13.13 | 10.79 | 10.91 | 0.4  | 0.46 | -0.11 | 9.29E-03 | 0.0392 | (B) TP53 wild in GC |
| CUL1     | 7q36.1   | 10.37 | 10.48 | 0.45 | 0.38 | -0.11 | 9.32E-03 | 0.0393 | (B) TP53 wild in GC |
| ADGRE2   | 19p13.12 | 7.43  | 7.73  | 1.07 | 1.26 | -0.3  | 9.37E-03 | 0.0395 | (B) TP53 wild in GC |
| ZNF275   | Xq28     | 9.47  | 9.62  | 0.58 | 0.51 | -0.14 | 9.38E-03 | 0.0395 | (B) TP53 wild in GC |
| INKA2    | 1p13.2   | 5.2   | 5.5   | 1.15 | 1.19 | -0.3  | 9.46E-03 | 0.0398 | (B) TP53 wild in GC |
| GRHPR    | 9p13.2   | 10    | 10.14 | 0.53 | 0.52 | -0.14 | 9.48E-03 | 0.0398 | (B) TP53 wild in GC |
| EPHA3    | 3p11.1   | 7.2   | 7.64  | 1.59 | 1.8  | -0.44 | 9.50E-03 | 0.0399 | (B) TP53 wild in GC |
| SEPTIN11 | 4q21.1   | 11.35 | 11.5  | 0.59 | 0.59 | -0.15 | 9.58E-03 | 0.0402 | (B) TP53 wild in GC |
| YLPM1    | 14q24.3  | 10.48 | 10.58 | 0.4  | 0.4  | -0.1  | 9.59E-03 | 0.0402 | (B) TP53 wild in GC |
| TLL1     | 4q32.3   | 4.1   | 4.54  | 1.45 | 1.98 | -0.44 | 9.62E-03 | 0.0403 | (B) TP53 wild in GC |
| UBE2J1   | 6q15     | 11.18 | 11.3  | 0.43 | 0.45 | -0.11 | 9.63E-03 | 0.0404 | (B) TP53 wild in GC |
| PYGM     | 11q13.1  | 4.04  | 4.59  | 2.02 | 2.27 | -0.55 | 9.63E-03 | 0.0404 | (B) TP53 wild in GC |
| NR3C1    | 5q31.3   | 9.57  | 9.83  | 0.97 | 1.07 | -0.26 | 9.66E-03 | 0.0404 | (B) TP53 wild in GC |



|         |          |       |      |      |      |       |          |        |                     |
|---------|----------|-------|------|------|------|-------|----------|--------|---------------------|
| DDX42   | 17q23.3  | 11.02 | 11.1 | 0.34 | 0.33 | -0.09 | 9.68E-03 | 0.0405 | (B) TP53 wild in GC |
| FBXO22  | 15q24.2  | 8.59  | 8.7  | 0.46 | 0.46 | -0.12 | 9.68E-03 | 0.0405 | (B) TP53 wild in GC |
| INPP5B  | 1p34.3   | 8.5   | 8.65 | 0.58 | 0.6  | -0.15 | 9.69E-03 | 0.0405 | (B) TP53 wild in GC |
| KYAT3   | 1p22.2   | 8.77  | 8.93 | 0.56 | 0.64 | -0.15 | 9.71E-03 | 0.0406 | (B) TP53 wild in GC |
| KLHDC1  | 14q21.3  | 5.23  | 5.51 | 0.96 | 1.2  | -0.28 | 9.72E-03 | 0.0406 | (B) TP53 wild in GC |
| TCEAL7  | Xq22.2   | 4.23  | 4.6  | 1.31 | 1.61 | -0.37 | 9.75E-03 | 0.0407 | (B) TP53 wild in GC |
| ZNF800  | 7q31.33  | 9.26  | 9.38 | 0.5  | 0.44 | -0.12 | 9.76E-03 | 0.0407 | (B) TP53 wild in GC |
| ZNF445  | 3p21.31  | 9.12  | 9.26 | 0.55 | 0.53 | -0.14 | 9.78E-03 | 0.0407 | (B) TP53 wild in GC |
| ZFP30   | 19q13.12 | 6.48  | 6.82 | 1.38 | 1.24 | -0.34 | 9.79E-03 | 0.0407 | (B) TP53 wild in GC |
| CREB3L2 | 7q33     | 11.01 | 11.2 | 0.72 | 0.72 | -0.19 | 9.81E-03 | 0.0408 | (B) TP53 wild in GC |
| NUDT13  | 10q22.2  | 5.14  | 5.4  | 1.09 | 0.87 | -0.26 | 9.82E-03 | 0.0408 | (B) TP53 wild in GC |
| CYP4X1  | 1p33 1   | 5.87  | 6.41 | 2.06 | 2.17 | -0.54 | 9.84E-03 | 0.0409 | (B) TP53 wild in GC |
| SMYD4   | 17p13.3  | 8.03  | 8.15 | 0.49 | 0.45 | -0.12 | 9.88E-03 | 0.041  | (B) TP53 wild in GC |
| PECAM1  | 17q23.3  | 9.63  | 9.85 | 0.82 | 0.95 | -0.23 | 9.88E-03 | 0.041  | (B) TP53 wild in GC |
| MRO     | 18q21.2  | 3.61  | 3.99 | 1.54 | 1.37 | -0.38 | 9.90E-03 | 0.0411 | (B) TP53 wild in GC |
| PLCD4   | 2q35     | 5.68  | 5.92 | 0.81 | 1.08 | -0.24 | 9.90E-03 | 0.0411 | (B) TP53 wild in GC |

|          |          |       |       |      |      |       |          |        |                     |
|----------|----------|-------|-------|------|------|-------|----------|--------|---------------------|
| ALDH1B1  | 9p13.1   | 10.39 | 10.66 | 0.99 | 1.15 | -0.27 | 9.93E-03 | 0.0411 | (B) TP53 wild in GC |
| DTX1     | 12q24.13 | 6.73  | 7.1   | 1.38 | 1.52 | -0.37 | 9.94E-03 | 0.0412 | (B) TP53 wild in GC |
| ABLIM1   | 10q25.3  | 11.82 | 12.05 | 0.93 | 0.82 | -0.23 | 9.97E-03 | 0.0413 | (B) TP53 wild in GC |
| HACD4    | 9p21.3   | 7.53  | 7.83  | 1.08 | 1.25 | -0.3  | 9.98E-03 | 0.0413 | (B) TP53 wild in GC |
| CHMP7    | 8p21.3   | 9.73  | 9.86  | 0.53 | 0.48 | -0.13 | 9.99E-03 | 0.0413 | (B) TP53 wild in GC |
| GALNT12  | 9q22.33  | 9.41  | 9.67  | 1.03 | 0.96 | -0.26 | 9.99E-03 | 0.0413 | (B) TP53 wild in GC |
| PCMTD1   | 8q11.23  | 9.98  | 10.14 | 0.67 | 0.63 | -0.17 | 1.00E-02 | 0.0413 | (B) TP53 wild in GC |
| TRAPPC13 | 5q12.3   | 8.38  | 8.5   | 0.48 | 0.42 | -0.12 | 0.01     | 0.0413 | (B) TP53 wild in GC |
| MPDZ     | 9p23     | 7.65  | 8.02  | 1.29 | 1.58 | -0.36 | 0.01     | 0.0414 | (B) TP53 wild in GC |
| LOXL1    | 15q24.1  | 9.37  | 9.65  | 1.09 | 1.13 | -0.29 | 0.01     | 0.0414 | (B) TP53 wild in GC |
| FAM13A-A | 4q22.1   | 4.83  | 5.1   | 1.05 | 1.1  | -0.27 | 0.0102   | 0.0418 | (B) TP53 wild in GC |
| MIR22HG  | 17p13.3  | 6.95  | 7.18  | 0.93 | 0.85 | -0.23 | 0.0102   | 0.042  | (B) TP53 wild in GC |
| NCF1     | 7q11.23  | 6.9   | 7.28  | 1.4  | 1.53 | -0.37 | 0.0102   | 0.042  | (B) TP53 wild in GC |
| DNAJC18  | 5q31.2   | 6.33  | 6.57  | 0.88 | 0.99 | -0.24 | 0.0102   | 0.0421 | (B) TP53 wild in GC |
| UBP1     | 3p22.3   | 10.61 | 10.72 | 0.45 | 0.42 | -0.11 | 0.0103   | 0.0421 | (B) TP53 wild in GC |
| STYX     | 14q22.1  | 9.08  | 9.2   | 0.48 | 0.44 | -0.12 | 0.0104   | 0.0427 | (B) TP53 wild in GC |

|          |          |       |       |      |      |       |        |        |                           |
|----------|----------|-------|-------|------|------|-------|--------|--------|---------------------------|
| APOBEC3F | 22q13.1  | 7.04  | 7.3   | 1.03 | 1.03 | -0.26 | 0.0105 | 0.0428 | (B) TP53<br>wild in GC    |
| RBMXL1   | 1p22.2   | 9.52  | 9.63  | 0.42 | 0.43 | -0.11 | 0.0105 | 0.0429 | (B) TP53<br>wild in GC    |
| ZNF501   | 3p21.31  | 5.75  | 5.99  | 0.93 | 0.94 | -0.24 | 0.0105 | 0.043  | (B) TP53<br>wild in GC    |
| USP8     | 15q21.2  | 10.28 | 10.38 | 0.38 | 0.37 | -0.1  | 0.0105 | 0.043  | (B) TP53<br>wild in GC    |
| MACF1    | 1p34.3   | 11.98 | 12.17 | 0.67 | 0.89 | -0.2  | 0.0106 | 0.0431 | (B) TP53<br>wild in<br>GC |
| HLA-DRB1 | 6p21.32  | 11.17 | 11.57 | 1.6  | 1.44 | -0.39 | 0.0106 | 0.0433 | (B) TP53<br>wild in GC    |
| RAI1     | 17p11.2  | 10.58 | 10.74 | 0.62 | 0.64 | -0.16 | 0.0106 | 0.0433 | (B) TP53<br>wild in GC    |
| NDFIP1   | 5q31.3   | 11.33 | 11.44 | 0.43 | 0.4  | -0.11 | 0.0106 | 0.0433 | (B) TP53<br>wild in GC    |
| ZNF510   | 9q22.33  | 8.08  | 8.22  | 0.57 | 0.53 | -0.14 | 0.0107 | 0.0435 | (B) TP53<br>wild in GC    |
| GPR82    | Xp11.4   | 4.04  | 4.36  | 1.17 | 1.43 | -0.33 | 0.0107 | 0.0435 | (B) TP53<br>wild in GC    |
| CTDSPL   | 3p22.2   | 10.71 | 10.86 | 0.59 | 0.6  | -0.15 | 0.0107 | 0.0436 | (B) TP53<br>wild in GC    |
| ADCK2    | 7q34     | 9.03  | 9.2   | 0.67 | 0.59 | -0.16 | 0.0108 | 0.0438 | (B) TP53<br>wild in GC    |
| VPS39    | 15q15.1  | 10.45 | 10.55 | 0.37 | 0.42 | -0.1  | 0.0108 | 0.044  | (B) TP53<br>wild in GC    |
| MZF1-AS1 | 19q13.43 | 4.25  | 4.48  | 0.97 | 0.83 | -0.23 | 0.0109 | 0.044  | (B) TP53<br>wild in GC    |

|          |          |       |       |      |      |       |        |        |                        |
|----------|----------|-------|-------|------|------|-------|--------|--------|------------------------|
| SCAF11   | 12q12    | 11.33 | 11.45 | 0.48 | 0.42 | -0.12 | 0.0109 | 0.044  | (B) TP53<br>wild in GC |
| FPR3     | 19q13.41 | 8.36  | 8.72  | 1.37 | 1.44 | -0.35 | 0.011  | 0.0446 | (B) TP53<br>wild in GC |
| LEPROTL1 | 8p12     | 9.97  | 10.11 | 0.53 | 0.52 | -0.13 | 0.0111 | 0.0446 | (B) TP53<br>wild in GC |
| VAV1     | 19p13.3  | 7.18  | 7.51  | 1.31 | 1.25 | -0.33 | 0.0111 | 0.0446 | (B) TP53<br>wild in GC |
| ACAP2    | 3q29     | 10.57 | 10.69 | 0.48 | 0.51 | -0.13 | 0.0111 | 0.0447 | (B) TP53<br>wild in GC |
| GMPR2    | 14q12    | 9.26  | 9.37  | 0.43 | 0.39 | -0.11 | 0.0111 | 0.0447 | (B) TP53<br>wild in GC |
| SELL     | 1q24.2   | 7.77  | 8.16  | 1.45 | 1.66 | -0.39 | 0.0112 | 0.045  | (B) TP53<br>wild in GC |
| PDS5A    | 4p14     | 11.54 | 11.65 | 0.45 | 0.44 | -0.11 | 0.0112 | 0.045  | (B) TP53<br>wild in GC |
| L3HYPDH  | 14q23.1  | 6.17  | 6.33  | 0.6  | 0.67 | -0.16 | 0.0112 | 0.045  | (B) TP53<br>wild in GC |
| TRAPPC2  | Xp22.2   | 7.74  | 7.89  | 0.63 | 0.57 | -0.15 | 0.0113 | 0.0452 | (B) TP53<br>wild in GC |
| LRRC8C   | 1p22.2   | 8.74  | 8.94  | 0.77 | 0.83 | -0.2  | 0.0113 | 0.0454 | (B) TP53<br>wild in GC |
| SIMC1    | 5q35.2   | 8.68  | 8.88  | 0.78 | 0.85 | -0.2  | 0.0113 | 0.0455 | (B) TP53<br>wild in GC |
| C1QC     | 1p36.12  | 11.06 | 11.4  | 1.35 | 1.35 | -0.34 | 0.0113 | 0.0455 | (B) TP53<br>wild in GC |
| SQOR     | 15q21.1  | 10.33 | 10.53 | 0.84 | 0.76 | -0.2  | 0.0113 | 0.0455 | (B) TP53<br>wild in GC |
| STAG1    | 3q22.3   | 9.65  | 9.8   | 0.57 | 0.56 | -0.14 | 0.0114 | 0.0457 | (B) TP53<br>wild in GC |

|          |                |       |      |      |      |       |        |        |                        |
|----------|----------------|-------|------|------|------|-------|--------|--------|------------------------|
| MGC16275 | 17q25.1        | 4.59  | 4.78 | 0.79 | 0.71 | -0.19 | 0.0114 | 0.0458 | (B) TP53<br>wild in GC |
| P2RY11   | 19p13.2        | 7.29  | 7.53 | 0.95 | 0.91 | -0.24 | 0.0115 | 0.0459 | (B) TP53<br>wild in GC |
| CBLB     | 3q13.11        | 9.31  | 9.45 | 0.57 | 0.56 | -0.14 | 0.0115 | 0.0459 | (B) TP53<br>wild in GC |
| DCLK2    | 4q31.23-<br>q3 | 5.48  | 5.85 | 1.32 | 1.63 | -0.37 | 0.0115 | 0.0459 | (B) TP53<br>wild in GC |
| CEP170   | 1q43           | 9.51  | 9.71 | 0.76 | 0.77 | -0.19 | 0.0115 | 0.0461 | (B) TP53<br>wild in GC |
| ARHGAP22 | 10q11.22-<br>q | 5.14  | 5.44 | 1.13 | 1.26 | -0.3  | 0.0115 | 0.0461 | (B) TP53<br>wild in GC |
| RPS15    | 19p13.3        | 12.21 | 12.4 | 0.8  | 0.74 | -0.19 | 0.0115 | 0.0461 | (B) TP53<br>wild in GC |
| ERMAP    | 1p34.2         | 7.75  | 7.9  | 0.6  | 0.62 | -0.15 | 0.0115 | 0.0461 | (B) TP53<br>wild in GC |
| MNDA     | 1q23.1         | 7     | 7.33 | 1.22 | 1.43 | -0.33 | 0.0116 | 0.0462 | (B) TP53<br>wild in GC |
| MAFB     | 20q12          | 9.34  | 9.63 | 1.09 | 1.2  | -0.29 | 0.0116 | 0.0463 | (B) TP53<br>wild in GC |
| PHF7     | 3p21.1         | 5.48  | 5.67 | 0.77 | 0.75 | -0.19 | 0.0116 | 0.0465 | (B) TP53<br>wild in GC |
| SAMM50   | 22q13.31       | 9.7   | 9.81 | 0.47 | 0.42 | -0.11 | 0.0117 | 0.0465 | (B) TP53<br>wild in GC |
| ZCCHC10  | 5q31.1         | 8.22  | 8.33 | 0.48 | 0.45 | -0.12 | 0.0117 | 0.0465 | (B) TP53<br>wild in GC |
| PLEK     | 2p14           | 8.4   | 8.76 | 1.36 | 1.46 | -0.35 | 0.0117 | 0.0467 | (B) TP53<br>wild in GC |
| SH3RF2   | 5q32           | 9.18  | 9.57 | 1.79 | 1.21 | -0.39 | 0.0117 | 0.0467 | (B) TP53<br>wild in GC |
| TANK     | 2q24.2         | 9.77  | 9.89 | 0.5  | 0.43 | -0.12 | 0.0118 | 0.0468 | (B) TP53<br>wild in GC |

|          |          |       |       |      |      |       |        |        |                        |
|----------|----------|-------|-------|------|------|-------|--------|--------|------------------------|
| PRRT1    | 6p21.32  | 5.5   | 5.82  | 1.21 | 1.32 | -0.32 | 0.0118 | 0.047  | (B) TP53<br>wild in GC |
| HAUS4    | 14q11.2  | 8.79  | 8.92  | 0.54 | 0.53 | -0.13 | 0.0119 | 0.0471 | (B) TP53<br>wild in GC |
| CIPC     | 14q24.3  | 9.17  | 9.3   | 0.45 | 0.56 | -0.13 | 0.0119 | 0.0471 | (B) TP53<br>wild in GC |
| MRAS     | 3q22.3   | 8.1   | 8.38  | 1.05 | 1.21 | -0.28 | 0.0119 | 0.0471 | (B) TP53<br>wild in GC |
| CITED2   | 6q24.1   | 9.64  | 9.84  | 0.76 | 0.86 | -0.2  | 0.0119 | 0.0471 | (B) TP53<br>wild in GC |
| PIP4K2A  | 10p12.2  | 9.54  | 9.71  | 0.64 | 0.68 | -0.16 | 0.012  | 0.0474 | (B) TP53<br>wild in GC |
| AOPEP    | 9q22.32  | 8.98  | 9.18  | 0.74 | 0.81 | -0.19 | 0.012  | 0.0474 | (B) TP53<br>wild in GC |
| GOLGB1   | 3q13.33  | 11.78 | 11.93 | 0.56 | 0.61 | -0.15 | 0.012  | 0.0476 | (B) TP53<br>wild in GC |
| STX12    | 1p35.3   | 10.05 | 10.15 | 0.41 | 0.42 | -0.1  | 0.012  | 0.0477 | (B) TP53<br>wild in GC |
| RRAGA    | 9p22.1   | 10.19 | 10.31 | 0.5  | 0.49 | -0.12 | 0.012  | 0.0477 | (B) TP53<br>wild in GC |
| MSN      | Xq12     | 12.4  | 12.62 | 0.81 | 0.95 | -0.22 | 0.0121 | 0.0478 | (B) TP53<br>wild in GC |
| PTPRB    | 12q15    | 9.45  | 9.67  | 0.87 | 0.89 | -0.22 | 0.0122 | 0.0483 | (B) TP53<br>wild in GC |
| SLC25A53 | Xq22.2   | 3.87  | 4.14  | 1.08 | 1.12 | -0.27 | 0.0124 | 0.0486 | (B) TP53<br>wild in GC |
| GPR68    | 14q32.11 | 7.27  | 7.54  | 1.04 | 1.11 | -0.27 | 0.0124 | 0.0487 | (B) TP53<br>wild in GC |
| UBASH3B  | 11q24.1  | 7.77  | 8.04  | 1.14 | 1.04 | -0.27 | 0.0124 | 0.0487 | (B) TP53<br>wild in GC |
| FGD4     | 12p11.21 | 9.75  | 9.96  | 0.88 | 0.76 | -0.21 | 0.0124 | 0.0489 | (B) TP53<br>wild in GC |

|         |         |       |       |      |      |       |        |        |                        |
|---------|---------|-------|-------|------|------|-------|--------|--------|------------------------|
| EFR3A   | 8q24.22 | 11.07 | 11.18 | 0.46 | 0.47 | -0.12 | 0.0124 | 0.0489 | (B) TP53<br>wild in GC |
| CALCRL  | 2q32.1  | 8.99  | 9.24  | 0.88 | 1.13 | -0.25 | 0.0125 | 0.049  | (B) TP53<br>wild in GC |
| ZSWIM6  | 5q12.1  | 8.9   | 9.04  | 0.56 | 0.56 | -0.14 | 0.0125 | 0.0491 | (B) TP53<br>wild in GC |
| ARID2   | 12q12   | 10.02 | 10.16 | 0.57 | 0.51 | -0.14 | 0.0125 | 0.0491 | (B) TP53<br>wild in GC |
| SETD9   | 5q11.2  | 6.28  | 6.51  | 0.93 | 0.96 | -0.24 | 0.0125 | 0.0491 | (B) TP53<br>wild in GC |
| ANKRD17 | 4q13.3  | 11.45 | 11.55 | 0.42 | 0.41 | -0.1  | 0.0125 | 0.0492 | (B) TP53<br>wild in GC |
| FRMD6   | 14q22.1 | 8.48  | 8.79  | 1.19 | 1.37 | -0.31 | 0.0126 | 0.0495 | (B) TP53<br>wild in GC |
| NCK1    | 3q22.3  | 9.13  | 9.26  | 0.52 | 0.48 | -0.12 | 0.0128 | 0.05   | (B) TP53<br>wild in GC |

**Table S1:** 1363 mRNA highly expressed in TP53 wild-type gastric cancer.

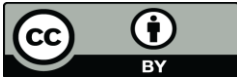

This article is an open access article distributed under the terms and conditions of the [Creative Commons Attribution \(CC-BY\) license 4.0](https://creativecommons.org/licenses/by/4.0/)
